# Supplementary material for: Exploring equity in health and poverty impacts of control measures for SARS-CoV-2 in six countries
Source: PubMed Central journal article supplement (PMC8159665; doi:10.1136/bmjgh-2021-005521), 2021-05-26
Supplement: bmjgh-2021-005521supp001.pdf [file bmjgh-2021-005521supp001.pdf]

## Supplemental File 1 Supplementary Results Tables

Supplementary Table 1 Total people in ISCO-08 occupation codes by country

|                                  | <b>Quintile 1</b> | <b>Quintile 2</b> | <b>Quintile 3</b> | <b>Quintile 4</b> | <b>Quintile 5</b> | <b>Total</b>     |
|----------------------------------|-------------------|-------------------|-------------------|-------------------|-------------------|------------------|
|                                  | n (thousands), %  | n (thousands), %  | n (thousands), %  | n (thousands), %  | n (thousands), %  | n (thousands), % |
| <b>Chile</b>                     |                   |                   |                   |                   |                   |                  |
| Total people in the labour force | 1,293             | 1,293             | 1,292             | 1,293             | 1,291             | 6,463            |
| Total unemployed people          | 115 (9%)          | 104 (8%)          | 114 (9%)          | 125 (10%)         | 74 (6%)           | 532 (8%)         |
| Total people in 'essential' jobs | 1,016 (79%)       | 772 (60%)         | 899 (70%)         | 355 (27%)         | 348 (27%)         | 3,391 (52%)      |
| Total people in 'closed' jobs    | 93 (7%)           | 185 (14%)         | 162 (13%)         | 112 (9%)          | 14 (1%)           | 567 (9%)         |
| Total people teleworking         | (0%)              | 17 (1%)           | 8 (1%)            | 434 (34%)         | 622 (48%)         | 1,082 (17%)      |
| Total people unable to telework  | 70 (5%)           | 215 (17%)         | 110 (8%)          | 267 (21%)         | 231 (18%)         | 893 (14%)        |
| <b>Georgia</b>                   |                   |                   |                   |                   |                   |                  |
| Total people in the labour force | 336               | 334               | 334               | 334               | 333               | 1,671            |
| Total unemployed people          | 217 (65%)         | 167 (50%)         | 179 (54%)         | 146 (44%)         | 122 (37%)         | 831 (50%)        |
| Total people in 'essential' jobs | 44 (13%)          | 61 (18%)          | 60 (18%)          | 87 (26%)          | 81 (24%)          | 333 (20%)        |
| Total people in 'closed' jobs    | 30 (9%)           | 81 (24%)          | 23 (7%)           | 40 (12%)          | 19 (6%)           | 193 (12%)        |
| Total people teleworking         | (0%)              | 1 (0%)            | 22 (7%)           | 38 (11%)          | 98 (29%)          | 160 (10%)        |
| Total people unable to telework  | 45 (13%)          | 25 (7%)           | 49 (15%)          | 23 (7%)           | 12 (4%)           | 154 (9%)         |
| <b>South Africa</b>              |                   |                   |                   |                   |                   |                  |
| Total people in the labour force | 3,222             | 3,221             | 3,222             | 3,221             | 3,223             | 16,108           |
| Total unemployed people          | 766 (24%)         | 916 (28%)         | 209 (6%)          | 277 (9%)          | 165 (5%)          | 2,332 (14%)      |
| Total people in 'essential' jobs | 1,026 (32%)       | 335 (10%)         | 838 (26%)         | 1,002 (31%)       | 978 (30%)         | 4,179 (26%)      |
| Total people in 'closed' jobs    | 917 (28%)         | 753 (23%)         | 352 (11%)         | 687 (21%)         | 541 (17%)         | 3,250 (20%)      |
| Total people teleworking         | (0%)              | 41 (1%)           | 64 (2%)           | 706 (22%)         | 1,228 (38%)       | 2,040 (13%)      |
| Total people unable to telework  | 514 (16%)         | 1,176 (37%)       | 1,759 (55%)       | 549 (17%)         | 310 (10%)         | 4,308 (27%)      |
| <b>Pakistan</b>                  |                   |                   |                   |                   |                   |                  |
| Total people in the labour force | 5,303             | 5,301             | 5,300             | 5,303             | 5,302             | 26,510           |
| Total unemployed people          | 121 (2%)          | 113 (2%)          | 160 (3%)          | 189 (4%)          | 248 (5%)          | 831 (3%)         |
| Total people in 'essential' jobs | 1,836 (35%)       | 1,386 (26%)       | 633 (12%)         | 1,144 (22%)       | 1,448 (27%)       | 6,447 (24%)      |

|                                  |             |             |             |             |             |              |
|----------------------------------|-------------|-------------|-------------|-------------|-------------|--------------|
| Total people in 'closed' jobs    | 521 (10%)   | 494 (9%)    | 1,915 (36%) | 852 (16%)   | 752 (14%)   | 4,533 (17%)  |
| Total people teleworking         | 1 (0%)      | 137 (3%)    | 181 (3%)    | 329 (6%)    | 2,322 (44%) | 2,971 (11%)  |
| Total people unable to telework  | 2,823 (53%) | 3,171 (60%) | 2,411 (45%) | 2,789 (53%) | 532 (10%)   | 11,727 (44%) |
| <b>Philippines</b>               |             |             |             |             |             |              |
| Total people in the labour force | 5,589       | 5,587       | 5,588       | 5,587       | 5,586       | 27,938       |
| Total unemployed people          | 167 (3%)    | 185 (3%)    | 249 (4%)    | 219 (4%)    | 114 (2%)    | 934 (3%)     |
| Total people in 'essential' jobs | 2,150 (38%) | 1,741 (31%) | 524 (9%)    | 1,190 (21%) | 2,314 (41%) | 7,918 (28%)  |
| Total people in 'closed' jobs    | 1,271 (23%) | 1,203 (22%) | 2,525 (45%) | 1,307 (23%) | 739 (13%)   | 7,046 (25%)  |
| Total people teleworking         | (0%)        | 63 (1%)     | 144 (3%)    | 817 (15%)   | 1,765 (32%) | 2,788 (10%)  |
| Total people unable to telework  | 2,001 (36%) | 2,396 (43%) | 2,146 (38%) | 2,054 (37%) | 655 (12%)   | 9,251 (33%)  |
| <b>United Kingdom</b>            |             |             |             |             |             |              |
| Total people in the labour force | 5,658       | 5,658       | 5,657       | 5,658       | 5,657       | 28,288       |
| Total unemployed people          | 287 (5%)    | 231 (4%)    | 163 (3%)    | 92 (2%)     | 63 (1%)     | 837 (3%)     |
| Total people in 'essential' jobs | 1,409 (25%) | 893 (16%)   | 1,996 (35%) | 1,550 (27%) | 2,461 (44%) | 8,310 (29%)  |
| Total people in 'closed' jobs    | 1,266 (22%) | 1,711 (30%) | 1,195 (21%) | 735 (13%)   | 741 (13%)   | 5,648 (20%)  |
| Total people teleworking         | 172 (3%)    | 306 (5%)    | 1,012 (18%) | 2,365 (42%) | 2,003 (35%) | 5,857 (21%)  |
| Total people unable to telework  | 2,524 (45%) | 2,517 (44%) | 1,291 (23%) | 915 (16%)   | 389 (7%)    | 7,637 (27%)  |

Supplementary Table 2 Total people in ISCO-08 occupation codes by country

| ISCO-08 Occupation code and description                       | ISEI Score | Total people in the workforce (including employees and unemployed) |         |          |             |              |         |
|---------------------------------------------------------------|------------|--------------------------------------------------------------------|---------|----------|-------------|--------------|---------|
|                                                               |            | Chile                                                              | Georgia | Pakistan | Philippines | South Africa | UK      |
| <b>1. Managers</b>                                            |            |                                                                    |         |          |             |              |         |
| 11 - Chief executives, senior officials and legislators       | 69         | 7.8K                                                               | 5.1K    | 115.2K   | 497.1K      | 825.4K       | 103.0K  |
| 12 - Administrative and commercial managers                   | 68         | 46.6K                                                              | 91.6K   | 201.3K   | 257.9K      | 34.1K        | 905.3K  |
| 13 - Production and specialised services managers             | 60         | 42.4K                                                              | 44.0K   | 316.6K   | 226.3K      |              | 1260.3K |
| 14 - Hospitality, retail and other services managers          | 53         |                                                                    |         | 25.7K    | 101.0K      | 130.4K       | 871.0K  |
| <b>2. Professionals</b>                                       |            |                                                                    |         |          |             |              |         |
| 21 - Science and engineering professionals                    | 70         | 204.8K                                                             | 34.8K   | 121.6K   | 256.4K      | 92.1K        | 1130.3K |
| 22 - Health professionals                                     | 66         | 109.6K                                                             | 33.7K   | 119.0K   | 290.8K      | 351.7K       | 1262.3K |
| 23 - Teaching professionals                                   | 63         | 301.4K                                                             | 129.8K  | 1971.2K  | 1288.8K     | 286.7K       | 1403.0K |
| 24 - Business and administration professionals                | 64         | 282.0K                                                             | 91.4K   | 266.5K   | 249.7K      |              | 2059.6K |
| 25 - Information and communications technology professionals  | 69         |                                                                    |         | 48.4K    | 141.6K      |              | 938.8K  |
| 26 - Legal, social and cultural professionals                 | 66         |                                                                    |         | 338.8K   | 129.2K      | 327.9K       | 610.8K  |
| <b>3. Technicians and associate professionals</b>             |            |                                                                    |         |          |             |              |         |
| 31 - Science and engineering associate professionals          | 51         | 131.6K                                                             | 39.2K   | 365.1K   | 300.9K      | 242.7K       | 528.3K  |
| 32 - Health associate professionals                           | 47         | 157.9K                                                             | 45.9K   | 474.1K   | 401.0K      | 313.8K       | 347.8K  |
| 33 - Business and administration associate professionals      | 52         | 66.7K                                                              | 28.5K   | 631.6K   | 726.5K      | 459.9K       | 1861.5K |
| 34 - Legal, social, cultural, related associate professionals | 45         | 396.1K                                                             | 89.1K   | 96.4K    | 158.0K      |              | 747.9K  |
| 35 - Information and communications technicians               | 53         |                                                                    |         | 150.5K   | 125.3K      | 1152.1K      | 220.0K  |
| <b>4. Clerical support workers</b>                            |            |                                                                    |         |          |             |              |         |
| 41 - General and keyboard clerks                              | 41         | 419.0K                                                             | 71.4K   | 490.0K   | 945.7K      | 665.5K       | 219.6K  |
| 42 - Customer services clerks                                 | 40         | 246.5K                                                             | 53.2K   | 160.8K   | 1072.1K     |              | 1195.2K |
| 43 - Numerical and material recording clerks                  | 43         |                                                                    |         | 184.0K   | 481.2K      |              | 648.5K  |
| 44 - Other clerical support workers                           | 39         |                                                                    |         | 55.0K    | 159.3K      | 1909.8K      | 955.2K  |
| <b>5. Service and sales workers</b>                           |            |                                                                    |         |          |             |              |         |
| 51 - Personal service workers                                 | 30         | 589.4K                                                             | 150.7K  | 1069.5K  | 1253.7K     | 951.7K       | 1017.6K |
| 52 - Sales workers                                            | 33         | 408.0K                                                             | 80.9K   | 1661.6K  | 2525.1K     |              | 1691.2K |
| 53 - Personal care workers                                    | 26         |                                                                    |         | 26.8K    | 414.7K      |              | 2038.9K |
| 54 - Protective services workers                              | 39         |                                                                    |         | 927.5K   | 995.7K      |              | 555.5K  |

**6. Skilled agricultural, forestry and fishery workers**

|                                                                 |    |        |       |        |       |        |        |
|-----------------------------------------------------------------|----|--------|-------|--------|-------|--------|--------|
| 61 - Market-oriented skilled agricultural workers               | 19 | 113.1K | 37.4K | 133.2K | 1.1K  | 36.8K  | 128.6K |
| 62 - Market-oriented skilled forestry, fishery, hunting workers | 24 | 1.3K   |       | 20.1K  | 25.5K |        | 20.7K  |
| 63 - Subsistence farmers, fishers, hunters and gatherers        | 10 |        |       |        |       | 686.3K |        |

**7. Craft and related trades workers**

|                                                                                |    |        |       |         |         |        |        |
|--------------------------------------------------------------------------------|----|--------|-------|---------|---------|--------|--------|
| 71 - Building and related trades workers, excluding electricians               | 34 | 338.0K | 81.9K | 1548.9K | 1485.3K | 779.8K | 452.6K |
| 72 - Metal, machinery and related trades workers                               | 38 | 269.6K | 69.6K | 773.2K  | 575.1K  | 87.2K  | 679.3K |
| 73 - Handicraft and printing workers                                           | 33 | 18.6K  | 7.2K  | 282.7K  | 169.9K  | 269.7K | 98.1K  |
| 74 - Electrical and electronic trades workers                                  | 43 | 124.0K | 63.3K | 390.4K  | 331.7K  |        | 264.9K |
| 75 - Food processing, wood working, garment and other craft and related trades | 27 |        |       | 2103.6K | 547.4K  |        | 251.1K |

**8. Plant and machine operators, and assemblers**

|                                             |    |        |        |         |         |         |        |
|---------------------------------------------|----|--------|--------|---------|---------|---------|--------|
| 81 - Stationary plant and machine operators | 29 | 42.8K  | 15.8K  | 1005.7K | 342.5K  | 486.8K  | 319.0K |
| 82 - Assemblers                             | 29 | 128.2K | 22.3K  | 12.0K   | 361.7K  |         | 120.0K |
| 83 - Drivers and mobile plant operators     | 36 | 400.9K | 128.7K | 1498.5K | 1709.5K | 3088.3K | 881.2K |

**9. Elementary occupations**

|                                                                  |    |        |        |         |         |         |        |
|------------------------------------------------------------------|----|--------|--------|---------|---------|---------|--------|
| 91 - Cleaners and helpers                                        | 17 | 915.8K | 171.2K | 1028.2K | 1991.1K | 1477.0K | 580.0K |
| 92 - Agricultural, forestry and fishery labourers                | 15 | 385.3K | 16.3K  | 2615.1K | 3246.3K | 1452.8K | 50.0K  |
| 93 - Labourers in mining, construction, manufacturing, transport | 24 | 315.6K | 68.1K  | 4714.9K | 3325.8K |         | 959.3K |
| 94 - Food preparation assistants                                 | 20 |        |        | 10.6K   | 23.3K   |         | 23.3K  |
| 95 - Street and related sales and service workers                | 25 |        |        | 555.4K  | 581.4K  |         | 354.3K |
| 96 - Refuse workers and other elementary workers                 | 26 |        |        |         | 222.1K  |         | 534.0K |

K, Thousand. ISEI, international socio-economic index.

Supplementary Table 3 Essential workers by country

| <b>ISCO-08 Occupation code and description</b>                | <b>Chile</b> | <b>Georgia</b> | <b>Pakistan</b> | <b>Philippines</b> | <b>South Africa</b> | <b>UK</b> |
|---------------------------------------------------------------|--------------|----------------|-----------------|--------------------|---------------------|-----------|
| <b>1. Managers</b>                                            | 1.2K         | 1.2K           | 29.9K           | 270.3K             | 186.4K              | 25.1K     |
| 11 - Chief executives, senior officials and legislators       | 3.6K         | 21.4K          | 52.3K           | 140.2K             | 7.7K                | 220.3K    |
| 12 - Administrative and commercial managers                   | 13.2K        | 10.3K          | 82.2K           | 123.1K             |                     | 306.6K    |
| 13 - Production and specialised services managers             |              |                | 6.7K            | 54.9K              | 29.5K               | 211.9K    |
| 14 - Hospitality, retail and other services managers          |              |                |                 |                    |                     |           |
| <b>2. Professionals</b>                                       | 37.1K        | 7.4K           | 10.9K           | 74.6K              | 20.7K               | 375.1K    |
| 21 - Science and engineering professionals                    | 83.5K        | 22.3K          | 115.2K          | 286.2K             | 336.8K              | 1252.0K   |
| 22 - Health professionals                                     | 54.6K        | 16.3K          | 91.4K           | 260.8K             | 29.6K               | 309.1K    |
| 23 - Teaching professionals                                   | 51.0K        | 19.4K          | 23.9K           | 72.7K              |                     | 683.4K    |
| 24 - Business and administration professionals                |              |                | 4.2K            | 41.0K              |                     | 306.0K    |
| 25 - Information and communications technology professionals  |              |                | 9.8K            | 23.3K              | 27.1K               | 48.0K     |
| 26 - Legal, social and cultural professionals                 |              |                |                 |                    |                     |           |
| <b>3. Technicians and associate professionals</b>             | 21.5K        | 10.4K          | 164.9K          | 117.4K             | 70.4K               | 187.6K    |
| 31 - Science and engineering associate professionals          | 115.5K       | 26.6K          | 450.6K          | 391.4K             | 295.4K              | 340.3K    |
| 32 - Health associate professionals                           | 10.9K        | 7.5K           | 285.4K          | 283.4K             | 133.4K              | 660.9K    |
| 33 - Business and administration associate professionals      | 64.7K        | 21.2K          | 38.9K           | 54.1K              |                     | 208.1K    |
| 34 - Legal, social, cultural, related associate professionals |              |                | 68.0K           | 48.9K              | 334.2K              | 78.1K     |
| 35 - Information and communications technicians               |              |                |                 |                    |                     |           |
| <b>4. Clerical support workers</b>                            | 75.2K        | 17.8K          | 211.0K          | 246.6K             | 171.4K              | 72.6K     |
| 41 - General and keyboard clerks                              | 44.2K        | 11.5K          | 60.6K           | 257.6K             |                     | 350.5K    |
| 42 - Customer services clerks                                 |              |                | 79.2K           | 125.5K             |                     | 214.5K    |
| 43 - Numerical and material recording clerks                  |              |                | 20.7K           | 38.3K              | 412.8K              | 280.2K    |
| 44 - Other clerical support workers                           |              |                |                 |                    |                     |           |
| <b>5. Service and sales workers</b>                           | 226.2K       | 30.6K          | 153.3K          | 129.5K             | 62.3K               | 73.5K     |
| 51 - Personal service workers                                 | 201.2K       | 16.4K          | 238.2K          | 253.4K             |                     | 122.1K    |
| 52 - Sales workers                                            |              |                | 15.8K           | 199.4K             |                     | 807.3K    |
| 53 - Personal care workers                                    |              |                | 156.8K          | 117.8K             |                     | 220.0K    |
| 54 - Protective services workers                              |              |                |                 |                    |                     |           |
| <b>6. Skilled agricultural, forestry and fishery workers</b>  | 95.8K        | 5.6K           | 81.8K           | 0.7K               | 34.5K               | 111.0K    |

|                                                                                |               |              |               |               |               |              |
|--------------------------------------------------------------------------------|---------------|--------------|---------------|---------------|---------------|--------------|
| 61 - Market-oriented skilled agricultural workers                              | 1.1K          |              | 8.5K          | 16.3K         |               | 5.7K         |
| 62 - Market-oriented skilled forestry, fishery, hunting workers                |               |              |               |               | 679.0K        |              |
| 63 - Subsistence farmers, fishers, hunters and gatherers                       |               |              |               |               |               |              |
| <b>7. Craft and related trades workers</b>                                     | <b>253.7K</b> | <b>10.9K</b> | <b>105.4K</b> | <b>69.7K</b>  | <b>30.3K</b>  | <b>45.8K</b> |
| 71 - Building and related trades workers, excluding electricians               | 199.8K        | 9.2K         | 52.6K         | 27.0K         | 3.4K          | 68.7K        |
| 72 - Metal, machinery and related trades workers                               | 14.0K         | 1.0K         | 19.2K         | 8.0K          | 10.5K         | 9.9K         |
| 73 - Handicraft and printing workers                                           | 91.9K         | 8.5K         | 26.6K         | 15.8K         |               | 29.0K        |
| 74 - Electrical and electronic trades workers                                  |               |              | 145.7K        | 26.2K         |               | 25.4K        |
| 75 - Food processing, wood working, garment and other craft and related trades |               |              |               |               |               |              |
| <b>8. Plant and machine operators, and assemblers</b>                          | <b>33.8K</b>  | <b>1.6K</b>  | <b>133.6K</b> | <b>25.7K</b>  | <b>60.6K</b>  | <b>31.9K</b> |
| 81 - Stationary plant and machine operators                                    | 101.1K        | 2.3K         | 1.6K          | 27.1K         |               | 12.0K        |
| 82 - Assemblers                                                                | 313.0K        | 20.7K        | 490.6K        | 505.8K        | 841.9K        | 221.5K       |
| 83 - Drivers and mobile plant operators                                        |               |              |               |               |               |              |
| <b>9. Elementary occupations</b>                                               | <b>705.9K</b> | <b>22.2K</b> | <b>346.5K</b> | <b>743.6K</b> | <b>204.6K</b> | <b>99.4K</b> |
| 91 - Cleaners and helpers                                                      | 316.1K        | 2.1K         | 895.8K        | 1259.2K       | 196.6K        | 7.3K         |
| 92 - Agricultural, forestry and fishery labourers                              | 260.6K        | 8.8K         | 1578.5K       | 1259.0K       |               | 122.5K       |
| 93 - Labourers in mining, construction, manufacturing, transport               |               |              | 3.6K          | 8.7K          |               | 4.0K         |
| 94 - Food preparation assistants                                               |               |              | 187.2K        | 217.1K        |               | 60.8K        |
| 95 - Street and related sales and service workers                              |               |              |               | 97.3K         |               | 101.6K       |
| 96 - Refuse workers and other elementary workers                               | 1.2K          | 1.2K         | 29.9K         | 270.3K        | 186.4K        | 25.1K        |

K, Thousand.

Supplementary Table 4 Closed jobs by country

| ISCO-08 Occupation code and description                       | Chile  | Georgia | Pakistan | Philippines | South Africa | UK     |
|---------------------------------------------------------------|--------|---------|----------|-------------|--------------|--------|
| <b>1. Managers</b>                                            | 0.2K   | 0.5K    | 7.9K     | 93.1K       | 188.5K       | 21.8K  |
| 11 - Chief executives, senior officials and legislators       | 1.5K   | 8.7K    | 13.8K    | 48.3K       | 7.8K         | 192.0K |
| 12 - Administrative and commercial managers                   | 1.3K   | 4.2K    | 21.7K    | 42.4K       |              | 267.3K |
| 13 - Production and specialised services managers             |        |         | 1.8K     | 18.9K       | 29.8K        | 184.7K |
| 14 - Hospitality, retail and other services managers          |        |         |          |             |              |        |
| <b>2. Professionals</b>                                       | 1.9K   | 1.7K    | 15.9K    | 14.3K       | 4.3K         | 77.7K  |
| 21 - Science and engineering professionals                    | 0.0B   | 0.0B    | 0.0B     | 0.0B        | 0.0B         | 0.0B   |
| 22 - Health professionals                                     | 2.8K   | 6.4K    | 258.3K   | 71.9K       | 13.4K        | 66.2K  |
| 23 - Teaching professionals                                   | 2.7K   | 4.5K    | 34.9K    | 13.9K       |              | 141.5K |
| 24 - Business and administration professionals                |        |         | 6.3K     | 7.9K        |              | 64.5K  |
| 25 - Information and communications technology professionals  |        |         | 238.9K   | 70.5K       | 191.4K       | 336.4K |
| 26 - Legal, social and cultural professionals                 |        |         |          |             |              |        |
| <b>3. Technicians and associate professionals</b>             | 2.6K   | 3.9K    | 34.3K    | 57.3K       | 21.9K        | 85.1K  |
| 31 - Science and engineering associate professionals          | 0.0B   | 0.0B    | 0.0B     | 0.0B        | 0.0B         | 0.0B   |
| 32 - Health associate professionals                           | 1.3K   | 2.9K    | 59.3K    | 138.3K      | 41.5K        | 300.0K |
| 33 - Business and administration associate professionals      | 40.1K  | 25.1K   | 40.1K    | 78.5K       |              | 409.0K |
| 34 - Legal, social, cultural, related associate professionals |        |         | 14.1K    | 23.8K       | 104.0K       | 35.5K  |
| 35 - Information and communications technicians               |        |         |          |             |              |        |
| <b>4. Clerical support workers</b>                            | 42.7K  | 10.4K   | 24.4K    | 166.2K      | 187.0K       | 38.4K  |
| 41 - General and keyboard clerks                              | 25.1K  | 7.7K    | 8.0K     | 188.5K      |              | 209.1K |
| 42 - Customer services clerks                                 |        |         | 9.2K     | 84.6K       |              | 113.4K |
| 43 - Numerical and material recording clerks                  |        |         | 2.7K     | 28.0K       | 536.5K       | 167.1K |
| 44 - Other clerical support workers                           |        |         |          |             |              |        |
| <b>5. Service and sales workers</b>                           | 140.8K | 52.2K   | 870.0K   | 1041.5K     | 417.1K       | 585.1K |
| 51 - Personal service workers                                 | 97.5K  | 27.2K   | 876.3K   | 1378.1K     |              | 721.1K |
| 52 - Sales workers                                            |        |         | 5.4K     | 122.7K      |              | 295.9K |
| 53 - Personal care workers                                    |        |         | 579.8K   | 651.0K      |              | 187.2K |
| 54 - Protective services workers                              |        |         |          |             |              |        |
| <b>6. Skilled agricultural, forestry and fishery workers</b>  | 2.0K   | 0.0B    | 0.0B     | 0.0B        | 1.2K         | 0.0B   |

|                                                                                |              |              |               |               |               |               |
|--------------------------------------------------------------------------------|--------------|--------------|---------------|---------------|---------------|---------------|
| 61 - Market-oriented skilled agricultural workers                              | 0.0K         |              | 3.1K          | 0.0B          |               | 4.9K          |
| 62 - Market-oriented skilled forestry, fishery, hunting workers                |              |              |               |               | 0.0B          |               |
| 63 - Subsistence farmers, fishers, hunters and gatherers                       |              |              |               |               |               |               |
| <b>7. Craft and related trades workers</b>                                     | <b>33.5K</b> | <b>2.6K</b>  | <b>136.1K</b> | <b>138.7K</b> | <b>87.5K</b>  | <b>68.2K</b>  |
| 71 - Building and related trades workers, excluding electricians               | 12.8K        | 2.2K         | 68.0K         | 53.7K         | 9.8K          | 102.3K        |
| 72 - Metal, machinery and related trades workers                               | 2.4K         | 0.2K         | 24.8K         | 15.9K         | 30.2K         | 14.8K         |
| 73 - Handicraft and printing workers                                           | 2.4K         | 2.0K         | 34.3K         | 31.0K         |               | 39.9K         |
| 74 - Electrical and electronic trades workers                                  |              |              | 174.6K        | 49.9K         |               | 38.2K         |
| 75 - Food processing, wood working, garment and other craft and related trades |              |              |               |               |               |               |
| <b>8. Plant and machine operators, and assemblers</b>                          | <b>4.3K</b>  | <b>0.2K</b>  | <b>34.7K</b>  | <b>40.9K</b>  | <b>44.2K</b>  | <b>49.8K</b>  |
| 81 - Stationary plant and machine operators                                    | 12.9K        | 0.3K         | 0.4K          | 43.2K         |               | 18.7K         |
| 82 - Assemblers                                                                | 40.4K        | 1.7K         | 51.8K         | 192.6K        | 270.9K        | 114.0K        |
| 83 - Drivers and mobile plant operators                                        |              |              |               |               |               |               |
| <b>9. Elementary occupations</b>                                               | <b>93.5K</b> | <b>21.8K</b> | <b>121.8K</b> | <b>465.0K</b> | <b>547.0K</b> | <b>234.8K</b> |
| 91 - Cleaners and helpers                                                      | 0.0B         | 1.2K         | 251.8K        | 742.1K        | 516.1K        | 15.9K         |
| 92 - Agricultural, forestry and fishery labourers                              | 1.7K         | 5.0K         | 453.9K        | 760.3K        |               | 305.9K        |
| 93 - Labourers in mining, construction, manufacturing, transport               |              |              | 1.0K          | 5.3K          |               | 7.4K          |
| 94 - Food preparation assistants                                               |              |              | 53.5K         | 132.9K        |               | 113.0K        |
| 95 - Street and related sales and service workers                              |              |              |               | 35.1K         |               | 20.9K         |
| 96 - Refuse workers and other elementary workers                               | 0.2K         | 0.5K         | 7.9K          | 93.1K         | 188.5K        | 21.8K         |
