# Supplementary material for: Exploring equity in health and poverty impacts of control measures for SARS-CoV-2 in six countries
Source: PubMed Central journal article supplement (PMC8159665; doi:10.1136/bmjgh-2021-005521), 2021-05-26
Supplement: bmjgh-2021-005521supp002.pdf [file bmjgh-2021-005521supp002.pdf]

## Philippines

The Philippines reported its first case of COVID-19 on January 30, 2020. Starting March 16, the government instituted Enhanced Community Quarantine (ECQ). ECQ, the strictest of all levels was initially planned to end on April 30, but was subsequently extended to May 15 in selected areas. During ECQ, the medical sector, agricultural sector, delivery and courier services, as well as manufacturing and supply-chain activities related to these sectors have been maintained at full capacity. Establishments related in the provision of essential goods and services such as public markets, grocery stores, and the like; as well as media establishments, are allowed to operate at 50% capacity. Financial services such as banks, other medical and dental services, water supply and sanitation services, and telecommunications and utilities, and other services were limited to a skeletal workforce.

On June 1, the government moved Metro Manila and other high-risk areas from a "modified enhanced community quarantine" to a "general community quarantine," which allows more businesses to reopen and mass transportation to resume in phases. As of writing, Cebu City, which had been under "enhanced community quarantine" from June 16 to July 15, has transitioned to a less restrictive "modified enhanced community quarantine."

### Percent of jobs that were essential during lockdown

| Isco Nace | Occupation description                                                                 | A    | B    | C    | D    | E    | F    | G    | H    | I    | J    | K    | L    | M    | N    | O    | P    | Q    | R    | S    | T    |      |
|-----------|----------------------------------------------------------------------------------------|------|------|------|------|------|------|------|------|------|------|------|------|------|------|------|------|------|------|------|------|------|
| 11        | 11 - Chief executives, senior officials and legislators                                | 100% | 10%  | 10%  | 10%  | 10%  | 0%   | 0%   | 0%   | 50%  | 0%   | 25%  | 25%  | 0%   | 0%   | 0%   | 100% | 0%   | 100% | 0%   | 0%   |      |
| 12        | 12 - Administrative and commercial managers                                            | 100% | 10%  | 10%  | 10%  | 10%  | 0%   | 0%   | 0%   | 50%  | 0%   | 25%  | 25%  | 0%   | 0%   | 0%   | 100% | 0%   | 100% | 0%   | 0%   |      |
| 13        | 13 - Production and specialised services managers                                      | 100% | 10%  | 10%  | 10%  | 10%  | 0%   | 0%   | 0%   | 50%  | 0%   | 25%  | 25%  | 0%   | 0%   | 0%   | 100% | 0%   | 100% | 0%   | 0%   |      |
| 14        | 14 - Hospitality, retail and other services managers                                   | 100% | 10%  | 10%  | 10%  | 10%  | 0%   | 0%   | 0%   | 50%  | 0%   | 25%  | 25%  | 0%   | 0%   | 0%   | 100% | 0%   | 100% | 0%   | 0%   |      |
| 21        | 21 - Science and engineering professionals                                             | 100% | 10%  | 10%  | 10%  | 10%  | 0%   | 0%   | 0%   | 50%  | 0%   | 25%  | 25%  | 0%   | 0%   | 0%   | 100% | 0%   | 100% | 0%   | 0%   |      |
| 22        | 22 - Health professionals                                                              | 100% | 100% | 100% | 100% | 100% | 100% | 100% | 100% | 100% | 100% | 100% | 100% | 100% | 100% | 100% | 100% | 100% | 100% | 100% | 100% | 100% |
| 23        | 23 - Teaching professionals                                                            | 100% | 10%  | 10%  | 10%  | 10%  | 0%   | 0%   | 0%   | 0%   | 0%   | 25%  | 25%  | 0%   | 0%   | 0%   | 100% | 0%   | 0%   | 0%   | 0%   |      |
| 24        | 24 - Business and administration professionals                                         | 100% | 10%  | 10%  | 10%  | 10%  | 0%   | 0%   | 0%   | 50%  | 0%   | 25%  | 25%  | 0%   | 0%   | 0%   | 100% | 0%   | 100% | 0%   | 0%   |      |
| 25        | 25 - Information and communications technology professionals                           | 100% | 10%  | 10%  | 10%  | 10%  | 0%   | 0%   | 0%   | 0%   | 0%   | 25%  | 25%  | 0%   | 0%   | 0%   | 100% | 0%   | 100% | 0%   | 0%   |      |
| 26        | 26 - Legal, social and cultural professionals                                          | 100% | 0%   | 0%   | 0%   | 0%   | 0%   | 0%   | 0%   | 0%   | 0%   | 0%   | 0%   | 0%   | 0%   | 0%   | 100% | 0%   | 0%   | 0%   | 0%   |      |
| 31        | 31 - Science and engineering associate professionals                                   | 100% | 10%  | 10%  | 10%  | 10%  | 0%   | 0%   | 0%   | 50%  | 0%   | 25%  | 25%  | 0%   | 0%   | 0%   | 100% | 0%   | 100% | 0%   | 0%   |      |
| 32        | 32 - Health associate professionals                                                    | 100% | 100% | 100% | 100% | 100% | 100% | 100% | 100% | 100% | 100% | 100% | 100% | 100% | 100% | 100% | 100% | 100% | 100% | 100% | 100% | 100% |
| 33        | 33 - Business and administration associate professionals                               | 100% | 10%  | 10%  | 10%  | 10%  | 0%   | 0%   | 0%   | 50%  | 0%   | 25%  | 25%  | 0%   | 0%   | 0%   | 100% | 0%   | 100% | 0%   | 0%   |      |
| 34        | 34 - Legal, social, cultural and related associate professionals                       | 100% | 0%   | 0%   | 0%   | 0%   | 0%   | 0%   | 0%   | 0%   | 0%   | 0%   | 0%   | 0%   | 0%   | 0%   | 100% | 0%   | 100% | 0%   | 0%   |      |
| 35        | 35 - Information and communications technicians                                        | 100% | 10%  | 10%  | 10%  | 10%  | 0%   | 0%   | 0%   | 50%  | 0%   | 25%  | 25%  | 0%   | 0%   | 0%   | 100% | 0%   | 100% | 0%   | 0%   |      |
| 41        | 41 - General and keyboard clerks                                                       | 100% | 10%  | 10%  | 10%  | 10%  | 0%   | 0%   | 0%   | 50%  | 0%   | 25%  | 25%  | 0%   | 0%   | 0%   | 100% | 0%   | 100% | 0%   | 0%   |      |
| 42        | 42 - Customer services clerks                                                          | 100% | 10%  | 10%  | 10%  | 10%  | 0%   | 0%   | 0%   | 0%   | 0%   | 25%  | 25%  | 0%   | 0%   | 0%   | 100% | 0%   | 100% | 0%   | 0%   |      |
| 43        | 43 - Numerical and material recording clerks                                           | 100% | 10%  | 10%  | 10%  | 10%  | 0%   | 0%   | 0%   | 50%  | 0%   | 25%  | 25%  | 0%   | 0%   | 0%   | 100% | 0%   | 100% | 0%   | 0%   |      |
| 44        | 44 - Other clerical support workers                                                    | 100% | 10%  | 10%  | 10%  | 10%  | 0%   | 0%   | 0%   | 0%   | 0%   | 25%  | 25%  | 0%   | 0%   | 0%   | 100% | 0%   | 100% | 0%   | 0%   |      |
| 51        | 51 - Personal service workers                                                          | 100% | 0%   | 0%   | 0%   | 0%   | 0%   | 0%   | 0%   | 0%   | 0%   | 25%  | 0%   | 0%   | 0%   | 0%   | 100% | 0%   | 10%  | 0%   | 0%   |      |
| 52        | 52 - Sales workers                                                                     | 100% | 0%   | 0%   | 0%   | 0%   | 0%   | 0%   | 0%   | 0%   | 0%   | 0%   | 0%   | 0%   | 0%   | 0%   | 100% | 0%   | 0%   | 0%   | 0%   |      |
| 53        | 53 - Personal care workers                                                             | 100% | 10%  | 10%  | 10%  | 10%  | 0%   | 0%   | 100% | 0%   | 0%   | 0%   | 25%  | 0%   | 0%   | 0%   | 100% | 0%   | 100% | 0%   | 0%   |      |
| 54        | 54 - Protective services workers                                                       | 100% | 10%  | 10%  | 10%  | 10%  | 0%   | 0%   | 0%   | 0%   | 0%   | 25%  | 25%  | 0%   | 0%   | 0%   | 100% | 0%   | 100% | 0%   | 0%   |      |
| 61        | 61 - Market-oriented skilled agricultural workers                                      | 100% | 10%  | 10%  | 10%  | 10%  | 0%   | 0%   | 0%   | 0%   | 0%   | 25%  | 25%  | 100% | 100% | 100% | 100% | 0%   | 0%   | 100% | 100% |      |
| 62        | 62 - Market-oriented skilled forestry, fishery and hunting workers                     | 100% | 10%  | 10%  | 10%  | 10%  | 0%   | 0%   | 0%   | 0%   | 0%   | 25%  | 25%  | 0%   | 0%   | 0%   | 100% | 0%   | 0%   | 0%   | 0%   |      |
| 63        | 63 - Subsistence farmers, fishers, hunters and gatherers                               | 100% | 100% | 100% | 100% | 100% | 100% | 100% | 100% | 100% | 100% | 100% | 100% | 100% | 100% | 100% | 100% | 100% | 100% | 100% | 100% | 100% |
| 71        | 71 - Building and related trades workers, excluding electricians                       | 100% | 10%  | 10%  | 10%  | 10%  | 0%   | 0%   | 0%   | 0%   | 0%   | 25%  | 25%  | 0%   | 0%   | 0%   | 100% | 0%   | 0%   | 0%   | 0%   |      |
| 72        | 72 - Metal, machinery and related trades workers                                       | 100% | 10%  | 10%  | 10%  | 10%  | 0%   | 0%   | 0%   | 0%   | 0%   | 25%  | 25%  | 0%   | 0%   | 0%   | 100% | 0%   | 0%   | 0%   | 0%   |      |
| 73        | 73 - Handicraft and printing workers                                                   | 100% | 10%  | 10%  | 10%  | 10%  | 0%   | 0%   | 0%   | 0%   | 0%   | 25%  | 25%  | 0%   | 0%   | 0%   | 100% | 0%   | 0%   | 0%   | 0%   |      |
| 74        | 74 - Electrical and electronic trades workers                                          | 100% | 10%  | 10%  | 10%  | 10%  | 0%   | 0%   | 0%   | 0%   | 0%   | 25%  | 25%  | 0%   | 0%   | 0%   | 100% | 0%   | 100% | 0%   | 0%   |      |
| 75        | 75 - Food processing, wood working, garment and other craft and related trades workers | 100% | 10%  | 10%  | 10%  | 10%  | 0%   | 0%   | 0%   | 0%   | 25%  | 25%  | 25%  | 0%   | 0%   | 0%   | 100% | 0%   | 0%   | 0%   | 0%   |      |
| 81        | 81 - Stationary plant and machine operators                                            | 100% | 10%  | 10%  | 10%  | 10%  | 0%   | 0%   | 0%   | 0%   | 0%   | 25%  | 25%  | 0%   | 0%   | 0%   | 100% | 0%   | 0%   | 0%   | 0%   |      |
| 82        | 82 - Assemblers                                                                        | 100% | 10%  | 10%  | 10%  | 10%  | 0%   | 0%   | 0%   | 0%   | 0%   | 25%  | 25%  | 0%   | 0%   | 0%   | 100% | 0%   | 0%   | 0%   | 0%   |      |
| 83        | 83 - Drivers and mobile plant operators                                                | 100% | 10%  | 10%  | 10%  | 10%  | 0%   | 0%   | 0%   | 50%  | 0%   | 25%  | 25%  | 0%   | 0%   | 0%   | 100% | 0%   | 50%  | 0%   | 0%   |      |
| 91        | 91 - Cleaners and helpers                                                              | 100% | 10%  | 10%  | 10%  | 10%  | 0%   | 0%   | 0%   | 0%   | 0%   | 25%  | 25%  | 0%   | 0%   | 0%   | 100% | 0%   | 100% | 0%   | 0%   |      |
| 92        | 92 - Agricultural, forestry and fishery labourers                                      | 100% | 10%  | 10%  | 10%  | 10%  | 0%   | 0%   | 0%   | 50%  | 0%   | 25%  | 25%  | 0%   | 0%   | 0%   | 100% | 0%   | 0%   | 0%   | 0%   |      |
| 93        | 93 - Labourers in mining, construction, manufacturing and transport                    | 100% | 10%  | 10%  | 10%  | 10%  | 0%   | 0%   | 0%   | 25%  | 0%   | 25%  | 25%  | 0%   | 0%   | 0%   | 100% | 0%   | 0%   | 0%   | 0%   |      |
| 94        | 94 - Food preparation assistants                                                       | 100% | 10%  | 10%  | 10%  | 10%  | 0%   | 0%   | 100% | 25%  | 50%  | 25%  | 25%  | 0%   | 0%   | 0%   | 100% | 0%   | 100% | 0%   | 0%   |      |
| 95        | 95 - Street and related sales and service workers                                      | 100% | 10%  | 10%  | 10%  | 10%  | 0%   | 0%   | 0%   | 0%   | 0%   | 25%  | 25%  | 0%   | 0%   | 0%   | 100% | 0%   | 100% | 0%   | 0%   |      |
| 96        | 96 - Refuse workers and other elementary workers                                       | 100% | 10%  | 10%  | 10%  | 10%  | 0%   | 0%   | 0%   | 0%   | 0%   | 25%  | 25%  | 0%   | 0%   | 0%   | 100% | 0%   | 100% | 0%   | 0%   |      |

Philippines

Percent of jobs that were closed during lockdown

| Isc0 | Nace | Occupation description                                                            | A.                                    | B. Mining     | C.            | D.                              | E. Water supply;                           | F.           | G. Wholesale and                           | H.                         | I.                                                       | J.                            | K. Financial                       | L. Real                | M.                                     | N.                         | O. Public                  | P. Education                            | Q. Human                           | R. Arts,                 | S. Other                                                                                         | T. Activities of households |      |
|------|------|-----------------------------------------------------------------------------------|---------------------------------------|---------------|---------------|---------------------------------|--------------------------------------------|--------------|--------------------------------------------|----------------------------|----------------------------------------------------------|-------------------------------|------------------------------------|------------------------|----------------------------------------|----------------------------|----------------------------|-----------------------------------------|------------------------------------|--------------------------|--------------------------------------------------------------------------------------------------|-----------------------------|------|
|      |      |                                                                                   | Agriculture; and forestry and fishing | and quarrying | Manufacturing | Electricity; gas, steam and air | sewerage, waste management and remediation | Construction | retail trade; repair of motor vehicles and | Transportation and storage | Wholesale and retail trade; repair of motor vehicles and | Information and communication | Insurance and financial activities | Real estate activities | Professional, scientific and technical | Administrative and support | Administration and defence | Human health and social work activities | Arts, entertainment and recreation | Other service activities | Activities of households as employers; undifferentiated goods- and services-producing activities |                             |      |
|      |      |                                                                                   | A                                     | B             | C             | D                               | E                                          | F            | G                                          | H                          | I                                                        | J                             | K                                  | L                      | M                                      | N                          | O                          | P                                       | Q                                  | R                        | S                                                                                                | T                           |      |
| 11   | 11   | Chief executives, senior officials and legislators                                | 0%                                    | 0%            | 0%            | 0%                              | 0%                                         | 0%           | 0%                                         | 100%                       | 0%                                                       | 100%                          | 0%                                 | 0%                     | 0%                                     | 0%                         | 0%                         | 0%                                      | 0%                                 | 0%                       | 100%                                                                                             | 100%                        | 100% |
| 12   | 12   | Administrative and commercial managers                                            | 0%                                    | 0%            | 0%            | 0%                              | 0%                                         | 0%           | 0%                                         | 100%                       | 0%                                                       | 100%                          | 0%                                 | 0%                     | 0%                                     | 0%                         | 0%                         | 0%                                      | 0%                                 | 0%                       | 0%                                                                                               | 100%                        | 100% |
| 13   | 13   | Production and specialised services managers                                      | 0%                                    | 0%            | 0%            | 0%                              | 0%                                         | 0%           | 0%                                         | 100%                       | 0%                                                       | 100%                          | 0%                                 | 0%                     | 0%                                     | 0%                         | 0%                         | 0%                                      | 0%                                 | 0%                       | 0%                                                                                               | 100%                        | 100% |
| 14   | 14   | Hospitality, retail and other services managers                                   | 0%                                    | 0%            | 0%            | 0%                              | 0%                                         | 0%           | 0%                                         | 100%                       | 0%                                                       | 100%                          | 0%                                 | 0%                     | 0%                                     | 0%                         | 0%                         | 0%                                      | 0%                                 | 0%                       | 0%                                                                                               | 100%                        | 100% |
| 21   | 21   | Science and engineering professionals                                             | 0%                                    | 0%            | 0%            | 0%                              | 0%                                         | 0%           | 0%                                         | 100%                       | 0%                                                       | 100%                          | 0%                                 | 0%                     | 0%                                     | 0%                         | 0%                         | 0%                                      | 0%                                 | 0%                       | 0%                                                                                               | 100%                        | 100% |
| 22   | 22   | Health professionals                                                              | 0%                                    | 0%            | 0%            | 0%                              | 0%                                         | 0%           | 0%                                         | 0%                         | 0%                                                       | 0%                            | 0%                                 | 0%                     | 0%                                     | 0%                         | 0%                         | 0%                                      | 0%                                 | 0%                       | 0%                                                                                               | 0%                          | 0%   |
| 23   | 23   | Teaching professionals                                                            | 0%                                    | 0%            | 0%            | 0%                              | 0%                                         | 0%           | 0%                                         | 100%                       | 0%                                                       | 100%                          | 0%                                 | 0%                     | 0%                                     | 0%                         | 0%                         | 0%                                      | 0%                                 | 0%                       | 0%                                                                                               | 100%                        | 100% |
| 24   | 24   | Business and administration professionals                                         | 0%                                    | 0%            | 0%            | 0%                              | 0%                                         | 0%           | 0%                                         | 100%                       | 0%                                                       | 100%                          | 0%                                 | 0%                     | 0%                                     | 0%                         | 0%                         | 0%                                      | 0%                                 | 0%                       | 0%                                                                                               | 100%                        | 100% |
| 25   | 25   | Information and communications technology professionals                           | 0%                                    | 0%            | 0%            | 0%                              | 0%                                         | 0%           | 0%                                         | 100%                       | 0%                                                       | 100%                          | 0%                                 | 0%                     | 0%                                     | 0%                         | 0%                         | 0%                                      | 0%                                 | 0%                       | 0%                                                                                               | 100%                        | 100% |
| 26   | 26   | Legal, social and cultural professionals                                          | 0%                                    | 75%           | 75%           | 75%                             | 75%                                        | 75%          | 75%                                        | 75%                        | 75%                                                      | 100%                          | 75%                                | 75%                    | 75%                                    | 75%                        | 75%                        | 0%                                      | 75%                                | 0%                       | 100%                                                                                             | 100%                        | 100% |
| 31   | 31   | Science and engineering associate professionals                                   | 0%                                    | 0%            | 0%            | 0%                              | 0%                                         | 0%           | 0%                                         | 100%                       | 0%                                                       | 100%                          | 0%                                 | 0%                     | 0%                                     | 0%                         | 0%                         | 0%                                      | 0%                                 | 0%                       | 0%                                                                                               | 100%                        | 100% |
| 32   | 32   | Health associate professionals                                                    | 0%                                    | 0%            | 0%            | 0%                              | 0%                                         | 0%           | 0%                                         | 0%                         | 0%                                                       | 0%                            | 0%                                 | 0%                     | 0%                                     | 0%                         | 0%                         | 0%                                      | 0%                                 | 0%                       | 0%                                                                                               | 0%                          | 0%   |
| 33   | 33   | Business and administration associate professionals                               | 0%                                    | 0%            | 0%            | 0%                              | 0%                                         | 0%           | 0%                                         | 100%                       | 0%                                                       | 100%                          | 0%                                 | 0%                     | 0%                                     | 0%                         | 0%                         | 0%                                      | 0%                                 | 0%                       | 0%                                                                                               | 100%                        | 100% |
| 34   | 34   | Legal, social, cultural and related associate professionals                       | 0%                                    | 75%           | 75%           | 75%                             | 75%                                        | 75%          | 75%                                        | 75%                        | 75%                                                      | 100%                          | 75%                                | 75%                    | 75%                                    | 75%                        | 75%                        | 0%                                      | 75%                                | 0%                       | 100%                                                                                             | 100%                        | 100% |
| 35   | 35   | Information and communications technicians                                        | 0%                                    | 0%            | 0%            | 0%                              | 0%                                         | 0%           | 0%                                         | 100%                       | 0%                                                       | 100%                          | 0%                                 | 0%                     | 0%                                     | 0%                         | 0%                         | 0%                                      | 0%                                 | 0%                       | 0%                                                                                               | 100%                        | 100% |
| 41   | 41   | General and keyboard clerks                                                       | 0%                                    | 0%            | 0%            | 0%                              | 0%                                         | 0%           | 0%                                         | 100%                       | 0%                                                       | 100%                          | 0%                                 | 0%                     | 0%                                     | 0%                         | 0%                         | 0%                                      | 0%                                 | 0%                       | 0%                                                                                               | 100%                        | 100% |
| 42   | 42   | Customer services clerks                                                          | 0%                                    | 0%            | 0%            | 0%                              | 0%                                         | 0%           | 0%                                         | 100%                       | 0%                                                       | 100%                          | 0%                                 | 0%                     | 0%                                     | 0%                         | 0%                         | 0%                                      | 0%                                 | 0%                       | 0%                                                                                               | 100%                        | 100% |
| 43   | 43   | Numerical and material recording clerks                                           | 0%                                    | 0%            | 0%            | 0%                              | 0%                                         | 0%           | 0%                                         | 100%                       | 0%                                                       | 100%                          | 0%                                 | 0%                     | 0%                                     | 0%                         | 0%                         | 0%                                      | 0%                                 | 0%                       | 0%                                                                                               | 100%                        | 100% |
| 44   | 44   | Other clerical support workers                                                    | 0%                                    | 0%            | 0%            | 0%                              | 0%                                         | 0%           | 0%                                         | 100%                       | 0%                                                       | 100%                          | 0%                                 | 0%                     | 0%                                     | 0%                         | 0%                         | 0%                                      | 0%                                 | 0%                       | 0%                                                                                               | 100%                        | 100% |
| 51   | 51   | Personal service workers                                                          | 0%                                    | 100%          | 100%          | 100%                            | 100%                                       | 100%         | 100%                                       | 100%                       | 100%                                                     | 100%                          | 75%                                | 100%                   | 100%                                   | 100%                       | 100%                       | 0%                                      | 100%                               | 0%                       | 100%                                                                                             | 100%                        | 100% |
| 52   | 52   | Sales workers                                                                     | 0%                                    | 75%           | 75%           | 75%                             | 75%                                        | 75%          | 75%                                        | 75%                        | 75%                                                      | 0%                            | 0%                                 | 0%                     | 100%                                   | 100%                       | 100%                       | 0%                                      | 75%                                | 0%                       | 100%                                                                                             | 100%                        | 100% |
| 53   | 53   | Personal care workers                                                             | 0%                                    | 0%            | 0%            | 0%                              | 0%                                         | 0%           | 0%                                         | 0%                         | 0%                                                       | 100%                          | 100%                               | 0%                     | 0%                                     | 0%                         | 0%                         | 0%                                      | 0%                                 | 0%                       | 0%                                                                                               | 100%                        | 100% |
| 54   | 54   | Protective services workers                                                       | 0%                                    | 0%            | 0%            | 0%                              | 0%                                         | 0%           | 0%                                         | 100%                       | 0%                                                       | 100%                          | 0%                                 | 0%                     | 0%                                     | 0%                         | 0%                         | 0%                                      | 0%                                 | 0%                       | 0%                                                                                               | 100%                        | 100% |
| 61   | 61   | Market-oriented skilled agricultural workers                                      | 0%                                    | 0%            | 0%            | 0%                              | 0%                                         | 0%           | 0%                                         | 100%                       | 0%                                                       | 100%                          | 0%                                 | 0%                     | 0%                                     | 0%                         | 0%                         | 0%                                      | 0%                                 | 0%                       | 0%                                                                                               | 0%                          | 0%   |
| 62   | 62   | Market-oriented skilled forestry, fishery and hunting workers                     | 0%                                    | 0%            | 0%            | 0%                              | 0%                                         | 0%           | 0%                                         | 100%                       | 0%                                                       | 100%                          | 0%                                 | 0%                     | 0%                                     | 0%                         | 0%                         | 0%                                      | 0%                                 | 0%                       | 0%                                                                                               | 100%                        | 100% |
| 63   | 63   | Subsistence farmers, fishers, hunters and gatherers                               | 0%                                    | 0%            | 0%            | 0%                              | 0%                                         | 0%           | 0%                                         | 0%                         | 0%                                                       | 0%                            | 0%                                 | 0%                     | 0%                                     | 0%                         | 0%                         | 0%                                      | 0%                                 | 0%                       | 0%                                                                                               | 0%                          | 0%   |
| 71   | 71   | Building and related trades workers, excluding electricians                       | 0%                                    | 0%            | 0%            | 0%                              | 0%                                         | 0%           | 0%                                         | 100%                       | 0%                                                       | 100%                          | 0%                                 | 0%                     | 0%                                     | 0%                         | 0%                         | 0%                                      | 0%                                 | 0%                       | 0%                                                                                               | 100%                        | 100% |
| 72   | 72   | Metal, machinery and related trades workers                                       | 0%                                    | 0%            | 0%            | 0%                              | 0%                                         | 0%           | 0%                                         | 100%                       | 0%                                                       | 100%                          | 0%                                 | 0%                     | 0%                                     | 0%                         | 0%                         | 0%                                      | 0%                                 | 0%                       | 0%                                                                                               | 100%                        | 100% |
| 73   | 73   | Handicraft and printing workers                                                   | 0%                                    | 0%            | 0%            | 0%                              | 0%                                         | 0%           | 0%                                         | 100%                       | 0%                                                       | 100%                          | 0%                                 | 0%                     | 0%                                     | 0%                         | 0%                         | 0%                                      | 0%                                 | 0%                       | 0%                                                                                               | 100%                        | 100% |
| 74   | 74   | Electrical and electronic trades workers                                          | 0%                                    | 0%            | 0%            | 0%                              | 0%                                         | 0%           | 0%                                         | 100%                       | 0%                                                       | 100%                          | 0%                                 | 0%                     | 0%                                     | 0%                         | 0%                         | 0%                                      | 0%                                 | 0%                       | 0%                                                                                               | 100%                        | 100% |
| 75   | 75   | Food processing, wood working, garment and other craft and related trades workers | 0%                                    | 0%            | 0%            | 0%                              | 0%                                         | 0%           | 0%                                         | 100%                       | 0%                                                       | 0%                            | 0%                                 | 0%                     | 0%                                     | 0%                         | 0%                         | 0%                                      | 100%                               | 0%                       | 100%                                                                                             | 100%                        | 100% |
| 81   | 81   | Stationary plant and machine operators                                            | 0%                                    | 0%            | 0%            | 0%                              | 0%                                         | 0%           | 0%                                         | 100%                       | 0%                                                       | 100%                          | 0%                                 | 0%                     | 0%                                     | 0%                         | 0%                         | 0%                                      | 0%                                 | 0%                       | 0%                                                                                               | 100%                        | 100% |
| 82   | 82   | Assemblers                                                                        | 0%                                    | 0%            | 0%            | 0%                              | 0%                                         | 0%           | 0%                                         | 100%                       | 0%                                                       | 100%                          | 0%                                 | 0%                     | 0%                                     | 0%                         | 0%                         | 0%                                      | 0%                                 | 0%                       | 0%                                                                                               | 100%                        | 100% |
| 83   | 83   | Drivers and mobile plant operators                                                | 0%                                    | 0%            | 0%            | 0%                              | 0%                                         | 0%           | 0%                                         | 100%                       | 0%                                                       | 0%                            | 0%                                 | 0%                     | 0%                                     | 0%                         | 0%                         | 0%                                      | 0%                                 | 0%                       | 0%                                                                                               | 100%                        | 100% |
| 91   | 91   | Cleaners and helpers                                                              | 0%                                    | 0%            | 0%            | 0%                              | 0%                                         | 0%           | 0%                                         | 100%                       | 0%                                                       | 100%                          | 0%                                 | 0%                     | 0%                                     | 0%                         | 0%                         | 100%                                    | 0%                                 | 0%                       | 0%                                                                                               | 100%                        | 100% |
| 92   | 92   | Agricultural, forestry and fishery labourers                                      | 0%                                    | 0%            | 0%            | 0%                              | 0%                                         | 0%           | 0%                                         | 100%                       | 0%                                                       | 100%                          | 0%                                 | 0%                     | 0%                                     | 0%                         | 0%                         | 0%                                      | 0%                                 | 0%                       | 0%                                                                                               | 100%                        | 100% |
| 93   | 93   | Labourers in mining, construction, manufacturing and transport                    | 0%                                    | 0%            | 0%            | 0%                              | 0%                                         | 0%           | 0%                                         | 100%                       | 0%                                                       | 100%                          | 0%                                 | 0%                     | 0%                                     | 0%                         | 0%                         | 0%                                      | 0%                                 | 0%                       | 0%                                                                                               | 100%                        | 100% |
| 94   | 94   | Food preparation assistants                                                       | 0%                                    | 0%            | 0%            | 0%                              | 0%                                         | 0%           | 0%                                         | 0%                         | 0%                                                       | 0%                            | 0%                                 | 0%                     | 0%                                     | 0%                         | 0%                         | 0%                                      | 0%                                 | 0%                       | 0%                                                                                               | 100%                        | 100% |
| 95   | 95   | Street and related sales and service workers                                      | 0%                                    | 0%            | 0%            | 0%                              | 0%                                         | 0%           | 0%                                         | 100%                       | 0%                                                       | 100%                          | 0%                                 | 0%                     | 0%                                     | 0%                         | 0%                         | 0%                                      | 0%                                 | 0%                       | 0%                                                                                               | 100%                        | 100% |
| 96   | 96   | Refuse workers and other elementary workers                                       | 0%                                    | 0%            | 0%            | 0%                              | 0%                                         | 0%           | 0%                                         | 100%                       | 0%                                                       | 100%                          | 0%                                 | 0%                     | 0%                                     | 0%                         | 0%                         | 0%                                      | 0%                                 | 0%                       | 0%                                                                                               | 100%                        | 100% |

## Philippines

## Percent of jobs subject to teleworking during lockdown

| Isc0 | Nace | Occupation description                                                            | A.                                    | B. Mining     | C.            | D.                              | E. Water supply;                           | F.           | G. Wholesale and                           | H.                         | I.                             | J.                            | K. Financial                       | L. Real                | M.                                     | N.                         | O. Public                   | P. Education | Q. Human                                | R. Arts,                     | S. Other           | T. Activities of households                                             |
|------|------|-----------------------------------------------------------------------------------|---------------------------------------|---------------|---------------|---------------------------------|--------------------------------------------|--------------|--------------------------------------------|----------------------------|--------------------------------|-------------------------------|------------------------------------|------------------------|----------------------------------------|----------------------------|-----------------------------|--------------|-----------------------------------------|------------------------------|--------------------|-------------------------------------------------------------------------|
|      |      |                                                                                   | Agriculture; and forestry and fishing | and quarrying | Manufacturing | Electricity; gas, steam and air | sewerage, waste management and remediation | Construction | retail trade; repair of motor vehicles and | Transportation and storage | Accommodation and food service | Information and communication | Insurance and financial activities | Real estate activities | Professional, scientific and technical | Administrative and support | administration and defence; |              | Human health and social work activities | entertainment and recreation | service activities | as employers; undifferentiated goods- and services-producing activities |
|      |      |                                                                                   | A                                     | B             | C             | D                               | E                                          | F            | G                                          | H                          | I                              | J                             | K                                  | L                      | M                                      | N                          | O                           | P            | Q                                       | R                            | S                  | T                                                                       |
| 11   | 11   | Chief executives, senior officials and legislators                                | 0%                                    | 90%           | 90%           | 90%                             | 90%                                        | 90%          | 100%                                       | 0%                         | 50%                            | 0%                            | 75%                                | 75%                    | 100%                                   | 100%                       | 100%                        | 0%           | 100%                                    | 0%                           | 0%                 | 0%                                                                      |
| 12   | 12   | Administrative and commercial managers                                            | 0%                                    | 90%           | 90%           | 90%                             | 90%                                        | 90%          | 100%                                       | 0%                         | 50%                            | 0%                            | 75%                                | 75%                    | 100%                                   | 100%                       | 100%                        | 0%           | 100%                                    | 0%                           | 0%                 | 0%                                                                      |
| 13   | 13   | Production and specialised services managers                                      | 0%                                    | 90%           | 90%           | 90%                             | 90%                                        | 90%          | 100%                                       | 0%                         | 50%                            | 0%                            | 75%                                | 75%                    | 100%                                   | 100%                       | 100%                        | 0%           | 100%                                    | 0%                           | 0%                 | 0%                                                                      |
| 14   | 14   | Hospitality, retail and other services managers                                   | 0%                                    | 90%           | 90%           | 90%                             | 90%                                        | 90%          | 100%                                       | 0%                         | 50%                            | 0%                            | 75%                                | 75%                    | 100%                                   | 100%                       | 100%                        | 0%           | 100%                                    | 0%                           | 0%                 | 0%                                                                      |
| 21   | 21   | Science and engineering professionals                                             | 0%                                    | 90%           | 90%           | 90%                             | 90%                                        | 90%          | 100%                                       | 0%                         | 50%                            | 0%                            | 75%                                | 75%                    | 100%                                   | 100%                       | 100%                        | 0%           | 100%                                    | 0%                           | 0%                 | 0%                                                                      |
| 22   | 22   | Health professionals                                                              | 0%                                    | 0%            | 0%            | 0%                              | 0%                                         | 0%           | 0%                                         | 0%                         | 0%                             | 0%                            | 0%                                 | 0%                     | 0%                                     | 0%                         | 0%                          | 0%           | 0%                                      | 0%                           | 0%                 | 0%                                                                      |
| 23   | 23   | Teaching professionals                                                            | 0%                                    | 90%           | 90%           | 90%                             | 90%                                        | 90%          | 100%                                       | 0%                         | 100%                           | 0%                            | 75%                                | 75%                    | 100%                                   | 100%                       | 100%                        | 0%           | 100%                                    | 100%                         | 0%                 | 0%                                                                      |
| 24   | 24   | Business and administration professionals                                         | 0%                                    | 90%           | 90%           | 90%                             | 90%                                        | 90%          | 100%                                       | 0%                         | 50%                            | 0%                            | 75%                                | 75%                    | 100%                                   | 100%                       | 100%                        | 0%           | 100%                                    | 0%                           | 0%                 | 0%                                                                      |
| 25   | 25   | Information and communications technology professionals                           | 0%                                    | 90%           | 90%           | 90%                             | 90%                                        | 90%          | 100%                                       | 0%                         | 100%                           | 0%                            | 75%                                | 75%                    | 100%                                   | 100%                       | 100%                        | 0%           | 100%                                    | 0%                           | 0%                 | 0%                                                                      |
| 26   | 26   | Legal, social and cultural professionals                                          | 0%                                    | 25%           | 25%           | 25%                             | 25%                                        | 25%          | 25%                                        | 25%                        | 25%                            | 0%                            | 25%                                | 25%                    | 25%                                    | 25%                        | 25%                         | 0%           | 25%                                     | 100%                         | 0%                 | 0%                                                                      |
| 31   | 31   | Science and engineering associate professionals                                   | 0%                                    | 90%           | 90%           | 90%                             | 90%                                        | 90%          | 100%                                       | 0%                         | 50%                            | 0%                            | 75%                                | 75%                    | 100%                                   | 100%                       | 100%                        | 0%           | 100%                                    | 0%                           | 0%                 | 0%                                                                      |
| 32   | 32   | Health associate professionals                                                    | 0%                                    | 0%            | 0%            | 0%                              | 0%                                         | 0%           | 0%                                         | 0%                         | 0%                             | 0%                            | 0%                                 | 0%                     | 0%                                     | 0%                         | 0%                          | 0%           | 0%                                      | 0%                           | 0%                 | 0%                                                                      |
| 33   | 33   | Business and administration associate professionals                               | 0%                                    | 90%           | 90%           | 90%                             | 90%                                        | 90%          | 100%                                       | 0%                         | 50%                            | 0%                            | 75%                                | 75%                    | 100%                                   | 100%                       | 100%                        | 0%           | 100%                                    | 0%                           | 0%                 | 0%                                                                      |
| 34   | 34   | Legal, social, cultural and related associate professionals                       | 0%                                    | 25%           | 25%           | 25%                             | 25%                                        | 25%          | 25%                                        | 25%                        | 25%                            | 0%                            | 25%                                | 25%                    | 25%                                    | 25%                        | 25%                         | 0%           | 25%                                     | 0%                           | 0%                 | 0%                                                                      |
| 35   | 35   | Information and communications technicians                                        | 0%                                    | 90%           | 90%           | 90%                             | 90%                                        | 90%          | 100%                                       | 0%                         | 50%                            | 0%                            | 75%                                | 75%                    | 100%                                   | 100%                       | 100%                        | 0%           | 100%                                    | 0%                           | 0%                 | 0%                                                                      |
| 41   | 41   | General and keyboard clerks                                                       | 0%                                    | 90%           | 90%           | 90%                             | 90%                                        | 90%          | 100%                                       | 0%                         | 50%                            | 0%                            | 75%                                | 75%                    | 100%                                   | 100%                       | 100%                        | 0%           | 100%                                    | 0%                           | 0%                 | 0%                                                                      |
| 42   | 42   | Customer services clerks                                                          | 0%                                    | 90%           | 90%           | 90%                             | 90%                                        | 90%          | 100%                                       | 0%                         | 100%                           | 0%                            | 75%                                | 75%                    | 100%                                   | 100%                       | 100%                        | 0%           | 100%                                    | 0%                           | 0%                 | 0%                                                                      |
| 43   | 43   | Numerical and material recording clerks                                           | 0%                                    | 90%           | 90%           | 90%                             | 90%                                        | 90%          | 100%                                       | 0%                         | 50%                            | 0%                            | 75%                                | 75%                    | 100%                                   | 100%                       | 100%                        | 0%           | 100%                                    | 0%                           | 0%                 | 0%                                                                      |
| 44   | 44   | Other clerical support workers                                                    | 0%                                    | 90%           | 90%           | 90%                             | 90%                                        | 90%          | 100%                                       | 0%                         | 100%                           | 0%                            | 75%                                | 75%                    | 100%                                   | 100%                       | 100%                        | 0%           | 100%                                    | 0%                           | 0%                 | 0%                                                                      |
| 51   | 51   | Personal service workers                                                          | 0%                                    | 0%            | 0%            | 0%                              | 0%                                         | 0%           | 0%                                         | 0%                         | 0%                             | 0%                            | 0%                                 | 0%                     | 0%                                     | 0%                         | 0%                          | 0%           | 0%                                      | 90%                          | 0%                 | 0%                                                                      |
| 52   | 52   | Sales workers                                                                     | 0%                                    | 25%           | 25%           | 25%                             | 25%                                        | 25%          | 25%                                        | 25%                        | 25%                            | 100%                          | 100%                               | 100%                   | 0%                                     | 0%                         | 0%                          | 0%           | 25%                                     | 100%                         | 0%                 | 0%                                                                      |
| 53   | 53   | Personal care workers                                                             | 0%                                    | 90%           | 90%           | 90%                             | 90%                                        | 90%          | 100%                                       | 0%                         | 100%                           | 0%                            | 0%                                 | 75%                    | 100%                                   | 100%                       | 100%                        | 0%           | 100%                                    | 0%                           | 0%                 | 0%                                                                      |
| 54   | 54   | Protective services workers                                                       | 0%                                    | 90%           | 90%           | 90%                             | 90%                                        | 90%          | 100%                                       | 0%                         | 100%                           | 0%                            | 75%                                | 75%                    | 100%                                   | 100%                       | 100%                        | 0%           | 100%                                    | 0%                           | 0%                 | 0%                                                                      |
| 61   | 61   | Market-oriented skilled agricultural workers                                      | 0%                                    | 90%           | 90%           | 90%                             | 90%                                        | 90%          | 100%                                       | 0%                         | 100%                           | 0%                            | 75%                                | 75%                    | 0%                                     | 0%                         | 0%                          | 0%           | 100%                                    | 100%                         | 0%                 | 0%                                                                      |
| 62   | 62   | Market-oriented skilled forestry, fishery and hunting workers                     | 0%                                    | 90%           | 90%           | 90%                             | 90%                                        | 90%          | 100%                                       | 0%                         | 100%                           | 0%                            | 75%                                | 75%                    | 100%                                   | 100%                       | 100%                        | 0%           | 100%                                    | 100%                         | 0%                 | 0%                                                                      |
| 63   | 63   | Subsistence farmers, fishers, hunters and gatherers                               | 0%                                    | 0%            | 0%            | 0%                              | 0%                                         | 0%           | 0%                                         | 0%                         | 0%                             | 0%                            | 0%                                 | 0%                     | 0%                                     | 0%                         | 0%                          | 0%           | 0%                                      | 0%                           | 0%                 | 0%                                                                      |
| 71   | 71   | Building and related trades workers, excluding electricians                       | 0%                                    | 90%           | 90%           | 90%                             | 90%                                        | 90%          | 100%                                       | 0%                         | 100%                           | 0%                            | 75%                                | 75%                    | 100%                                   | 100%                       | 100%                        | 0%           | 100%                                    | 100%                         | 0%                 | 0%                                                                      |
| 72   | 72   | Metal, machinery and related trades workers                                       | 0%                                    | 90%           | 90%           | 90%                             | 90%                                        | 90%          | 100%                                       | 0%                         | 100%                           | 0%                            | 75%                                | 75%                    | 100%                                   | 100%                       | 100%                        | 0%           | 100%                                    | 100%                         | 0%                 | 0%                                                                      |
| 73   | 73   | Handicraft and printing workers                                                   | 0%                                    | 90%           | 90%           | 90%                             | 90%                                        | 90%          | 100%                                       | 0%                         | 100%                           | 0%                            | 75%                                | 75%                    | 100%                                   | 100%                       | 100%                        | 0%           | 100%                                    | 100%                         | 0%                 | 0%                                                                      |
| 74   | 74   | Electrical and electronic trades workers                                          | 0%                                    | 90%           | 90%           | 90%                             | 90%                                        | 90%          | 100%                                       | 0%                         | 100%                           | 0%                            | 75%                                | 75%                    | 100%                                   | 100%                       | 100%                        | 0%           | 100%                                    | 0%                           | 0%                 | 0%                                                                      |
| 75   | 75   | Food processing, wood working, garment and other craft and related trades workers | 0%                                    | 90%           | 90%           | 90%                             | 90%                                        | 90%          | 100%                                       | 0%                         | 100%                           | 75%                           | 75%                                | 75%                    | 100%                                   | 100%                       | 100%                        | 0%           | 0%                                      | 100%                         | 0%                 | 0%                                                                      |
| 81   | 81   | Stationary plant and machine operators                                            | 0%                                    | 90%           | 90%           | 90%                             | 90%                                        | 90%          | 100%                                       | 0%                         | 100%                           | 0%                            | 75%                                | 75%                    | 100%                                   | 100%                       | 100%                        | 0%           | 100%                                    | 100%                         | 0%                 | 0%                                                                      |
| 82   | 82   | Assemblers                                                                        | 0%                                    | 90%           | 90%           | 90%                             | 90%                                        | 90%          | 100%                                       | 0%                         | 100%                           | 0%                            | 75%                                | 75%                    | 100%                                   | 100%                       | 100%                        | 0%           | 100%                                    | 100%                         | 0%                 | 0%                                                                      |
| 83   | 83   | Drivers and mobile plant operators                                                | 0%                                    | 90%           | 90%           | 90%                             | 90%                                        | 90%          | 100%                                       | 0%                         | 50%                            | 50%                           | 75%                                | 75%                    | 100%                                   | 100%                       | 100%                        | 0%           | 100%                                    | 50%                          | 0%                 | 0%                                                                      |
| 91   | 91   | Cleaners and helpers                                                              | 0%                                    | 90%           | 90%           | 90%                             | 90%                                        | 90%          | 100%                                       | 0%                         | 100%                           | 0%                            | 75%                                | 75%                    | 100%                                   | 100%                       | 100%                        | 0%           | 0%                                      | 0%                           | 0%                 | 0%                                                                      |
| 92   | 92   | Agricultural, forestry and fishery labourers                                      | 0%                                    | 90%           | 90%           | 90%                             | 90%                                        | 90%          | 100%                                       | 0%                         | 50%                            | 0%                            | 75%                                | 75%                    | 100%                                   | 100%                       | 100%                        | 0%           | 100%                                    | 100%                         | 0%                 | 0%                                                                      |
| 93   | 93   | Labourers in mining, construction, manufacturing and transport                    | 0%                                    | 90%           | 90%           | 90%                             | 90%                                        | 90%          | 100%                                       | 0%                         | 75%                            | 0%                            | 75%                                | 75%                    | 100%                                   | 100%                       | 100%                        | 0%           | 100%                                    | 100%                         | 0%                 | 0%                                                                      |
| 94   | 94   | Food preparation assistants                                                       | 0%                                    | 90%           | 90%           | 90%                             | 90%                                        | 90%          | 100%                                       | 0%                         | 75%                            | 50%                           | 75%                                | 75%                    | 100%                                   | 100%                       | 100%                        | 0%           | 100%                                    | 0%                           | 0%                 | 0%                                                                      |
| 95   | 95   | Street and related sales and service workers                                      | 0%                                    | 90%           | 90%           | 90%                             | 90%                                        | 90%          | 100%                                       | 0%                         | 100%                           | 0%                            | 75%                                | 75%                    | 100%                                   | 100%                       | 100%                        | 0%           | 100%                                    | 0%                           | 0%                 | 0%                                                                      |
| 96   | 96   | Refuse workers and other elementary workers                                       | 0%                                    | 90%           | 90%           | 90%                             | 90%                                        | 90%          | 100%                                       | 0%                         | 100%                           | 0%                            | 75%                                | 75%                    | 100%                                   | 100%                       | 100%                        | 0%           | 100%                                    | 0%                           | 0%                 | 0%                                                                      |

Chile

Chile reported its first confirmed COVID-19 case on March 3, 2020. In response to COVID-19, the authorities have implemented a range of measures, including declaration of state of catastrophe (extended till mid-September), travel restrictions, closure of schools, curfews and bans on public gatherings, and a law on teleworking. The authorities have also unveiled measures to support employment and incomes, and provide liquidity.

Percent of jobs that were essential during lockdown

| Isco1 Nace | Occupation description                                                                 | A.                                              | B. Mining     | C.            | D.                                           | E. Water supply;                           | F.           | G. Wholesale and                                   | H.                         | I.                                        | J.                                       | K. Financial  | L. Real           | M.                                                | N.                                    | O. Public                   | P. Education | Q. Human                          | R. Arts,                     | S. Other           | T. Activities of households                                                           |
|------------|----------------------------------------------------------------------------------------|-------------------------------------------------|---------------|---------------|----------------------------------------------|--------------------------------------------|--------------|----------------------------------------------------|----------------------------|-------------------------------------------|------------------------------------------|---------------|-------------------|---------------------------------------------------|---------------------------------------|-----------------------------|--------------|-----------------------------------|------------------------------|--------------------|---------------------------------------------------------------------------------------|
|            |                                                                                        | Agriculture; and forestry and quarrying fishing | and quarrying | Manufacturing | Electricity; gas, steam and air conditioning | sewerage, waste management and remediation | Construction | retail trade; repair of motor vehicles and storage | Transportation and storage | Accommodation and food service activities | Information and communication activities | and insurance | estate activities | Professional, scientific and technical activities | Administrative and support activities | administration and defence; |              | Health and social work activities | entertainment and recreation | service activities | as employers; undifferentiated goods- and services-producing activities of households |
| 11         | 11 - Chief executives, senior officials and legislators                                | 20%                                             | 20%           | 20%           | 20%                                          | 20%                                        | 20%          | 20%                                                | 0%                         | 20%                                       | 20%                                      | 20%           | 20%               | 20%                                               | 20%                                   | 20%                         | 20%          | 20%                               | 0%                           | 20%                | 20%                                                                                   |
| 12         | 12 - Administrative and commercial managers                                            | 10%                                             | 10%           | 10%           | 10%                                          | 10%                                        | 10%          | 10%                                                | 0%                         | 10%                                       | 10%                                      | 10%           | 10%               | 10%                                               | 10%                                   | 10%                         | 10%          | 10%                               | 0%                           | 10%                | 10%                                                                                   |
| 13         | 13 - Production and specialised services managers                                      | 40%                                             | 40%           | 40%           | 40%                                          | 40%                                        | 40%          | 40%                                                | 0%                         | 40%                                       | 40%                                      | 40%           | 40%               | 40%                                               | 40%                                   | 40%                         | 40%          | 40%                               | 0%                           | 40%                | 40%                                                                                   |
| 14         | 14 - Hospitality, retail and other services managers                                   | 20%                                             | 20%           | 20%           | 20%                                          | 20%                                        | 20%          | 20%                                                | 0%                         | 20%                                       | 20%                                      | 20%           | 20%               | 20%                                               | 20%                                   | 20%                         | 20%          | 20%                               | 0%                           | 20%                | 20%                                                                                   |
| 21         | 21 - Science and engineering professionals                                             | 20%                                             | 20%           | 20%           | 20%                                          | 20%                                        | 20%          | 20%                                                | 0%                         | 20%                                       | 20%                                      | 20%           | 20%               | 20%                                               | 20%                                   | 20%                         | 20%          | 20%                               | 0%                           | 20%                | 20%                                                                                   |
| 22         | 22 - Health professionals                                                              | 80%                                             | 80%           | 80%           | 80%                                          | 80%                                        | 80%          | 80%                                                | 80%                        | 80%                                       | 80%                                      | 80%           | 80%               | 80%                                               | 80%                                   | 80%                         | 80%          | 80%                               | 80%                          | 80%                | 80%                                                                                   |
| 23         | 23 - Teaching professionals                                                            | 20%                                             | 20%           | 20%           | 20%                                          | 20%                                        | 20%          | 20%                                                | 0%                         | 20%                                       | 20%                                      | 20%           | 20%               | 20%                                               | 20%                                   | 20%                         | 20%          | 20%                               | 0%                           | 20%                | 20%                                                                                   |
| 24         | 24 - Business and administration professionals                                         | 20%                                             | 20%           | 20%           | 20%                                          | 20%                                        | 20%          | 20%                                                | 0%                         | 20%                                       | 20%                                      | 20%           | 20%               | 20%                                               | 20%                                   | 20%                         | 20%          | 20%                               | 0%                           | 20%                | 20%                                                                                   |
| 25         | 25 - Information and communications technology professionals                           | 20%                                             | 20%           | 20%           | 20%                                          | 20%                                        | 20%          | 20%                                                | 0%                         | 20%                                       | 20%                                      | 20%           | 20%               | 20%                                               | 20%                                   | 20%                         | 20%          | 20%                               | 0%                           | 20%                | 20%                                                                                   |
| 26         | 26 - Legal, social and cultural professionals                                          | 20%                                             | 20%           | 20%           | 20%                                          | 20%                                        | 20%          | 20%                                                | 0%                         | 20%                                       | 20%                                      | 20%           | 20%               | 20%                                               | 20%                                   | 20%                         | 20%          | 20%                               | 0%                           | 20%                | 20%                                                                                   |
| 31         | 31 - Science and engineering associate professionals                                   | 20%                                             | 20%           | 20%           | 20%                                          | 20%                                        | 20%          | 20%                                                | 0%                         | 20%                                       | 20%                                      | 20%           | 20%               | 20%                                               | 20%                                   | 20%                         | 20%          | 20%                               | 0%                           | 20%                | 20%                                                                                   |
| 32         | 32 - Health associate professionals                                                    | 80%                                             | 80%           | 80%           | 80%                                          | 80%                                        | 80%          | 80%                                                | 80%                        | 80%                                       | 80%                                      | 80%           | 80%               | 80%                                               | 80%                                   | 80%                         | 80%          | 80%                               | 80%                          | 80%                | 80%                                                                                   |
| 33         | 33 - Business and administration associate professionals                               | 20%                                             | 20%           | 20%           | 20%                                          | 20%                                        | 20%          | 20%                                                | 0%                         | 20%                                       | 20%                                      | 20%           | 20%               | 20%                                               | 20%                                   | 20%                         | 20%          | 20%                               | 0%                           | 20%                | 20%                                                                                   |
| 34         | 34 - Legal, social, cultural and related associate professionals                       | 20%                                             | 20%           | 20%           | 20%                                          | 20%                                        | 20%          | 20%                                                | 0%                         | 20%                                       | 20%                                      | 20%           | 20%               | 20%                                               | 20%                                   | 20%                         | 20%          | 20%                               | 0%                           | 20%                | 20%                                                                                   |
| 35         | 35 - Information and communications technicians                                        | 20%                                             | 20%           | 20%           | 20%                                          | 20%                                        | 20%          | 20%                                                | 0%                         | 20%                                       | 20%                                      | 20%           | 20%               | 20%                                               | 20%                                   | 20%                         | 20%          | 20%                               | 0%                           | 20%                | 20%                                                                                   |
| 41         | 41 - General and keyboard clerks                                                       | 20%                                             | 20%           | 20%           | 20%                                          | 20%                                        | 20%          | 20%                                                | 20%                        | 20%                                       | 20%                                      | 20%           | 20%               | 20%                                               | 20%                                   | 20%                         | 20%          | 20%                               | 20%                          | 20%                | 20%                                                                                   |
| 42         | 42 - Customer services clerks                                                          | 20%                                             | 20%           | 20%           | 20%                                          | 20%                                        | 20%          | 20%                                                | 20%                        | 20%                                       | 20%                                      | 20%           | 20%               | 20%                                               | 20%                                   | 20%                         | 20%          | 20%                               | 20%                          | 20%                | 20%                                                                                   |
| 43         | 43 - Numerical and material recording clerks                                           | 20%                                             | 20%           | 20%           | 20%                                          | 20%                                        | 20%          | 20%                                                | 20%                        | 20%                                       | 20%                                      | 20%           | 20%               | 20%                                               | 20%                                   | 20%                         | 20%          | 20%                               | 20%                          | 20%                | 20%                                                                                   |
| 44         | 44 - Other clerical support workers                                                    | 20%                                             | 20%           | 20%           | 20%                                          | 20%                                        | 20%          | 20%                                                | 20%                        | 20%                                       | 20%                                      | 20%           | 20%               | 20%                                               | 20%                                   | 20%                         | 20%          | 20%                               | 20%                          | 20%                | 20%                                                                                   |
| 51         | 51 - Personal service workers                                                          | 50%                                             | 50%           | 50%           | 50%                                          | 50%                                        | 50%          | 50%                                                | 30%                        | 50%                                       | 50%                                      | 50%           | 50%               | 50%                                               | 50%                                   | 50%                         | 50%          | 50%                               | 30%                          | 50%                | 50%                                                                                   |
| 52         | 52 - Sales workers                                                                     | 70%                                             | 70%           | 70%           | 70%                                          | 70%                                        | 70%          | 70%                                                | 30%                        | 70%                                       | 70%                                      | 70%           | 70%               | 70%                                               | 70%                                   | 70%                         | 70%          | 70%                               | 30%                          | 70%                | 70%                                                                                   |
| 53         | 53 - Personal care workers                                                             | 50%                                             | 50%           | 50%           | 50%                                          | 50%                                        | 50%          | 50%                                                | 50%                        | 50%                                       | 50%                                      | 50%           | 50%               | 50%                                               | 50%                                   | 50%                         | 50%          | 50%                               | 50%                          | 50%                | 50%                                                                                   |
| 54         | 54 - Protective services workers                                                       | 50%                                             | 50%           | 50%           | 50%                                          | 50%                                        | 50%          | 50%                                                | 20%                        | 50%                                       | 50%                                      | 50%           | 50%               | 50%                                               | 50%                                   | 50%                         | 50%          | 50%                               | 20%                          | 50%                | 50%                                                                                   |
| 61         | 61 - Market-oriented skilled agricultural workers                                      | 90%                                             | 90%           | 90%           | 90%                                          | 90%                                        | 90%          | 90%                                                | 50%                        | 90%                                       | 90%                                      | 90%           | 90%               | 90%                                               | 90%                                   | 90%                         | 90%          | 90%                               | 50%                          | 90%                | 90%                                                                                   |
| 62         | 62 - Market-oriented skilled forestry, fishery and hunting workers                     | 90%                                             | 90%           | 90%           | 90%                                          | 90%                                        | 90%          | 90%                                                | 50%                        | 90%                                       | 90%                                      | 90%           | 90%               | 90%                                               | 90%                                   | 90%                         | 90%          | 90%                               | 50%                          | 90%                | 90%                                                                                   |
| 63         | 63 - Subsistence farmers, fishers, hunters and gatherers                               | 100%                                            | 100%          | 100%          | 100%                                         | 100%                                       | 100%         | 100%                                               | 100%                       | 100%                                      | 100%                                     | 100%          | 100%              | 100%                                              | 100%                                  | 100%                        | 100%         | 100%                              | 100%                         | 100%               | 100%                                                                                  |
| 71         | 71 - Building and related trades workers, excluding electricians                       | 90%                                             | 90%           | 90%           | 90%                                          | 90%                                        | 90%          | 90%                                                | 30%                        | 90%                                       | 90%                                      | 90%           | 90%               | 90%                                               | 90%                                   | 90%                         | 90%          | 90%                               | 30%                          | 90%                | 90%                                                                                   |
| 72         | 72 - Metal, machinery and related trades workers                                       | 90%                                             | 90%           | 90%           | 90%                                          | 90%                                        | 90%          | 90%                                                | 20%                        | 90%                                       | 90%                                      | 90%           | 90%               | 90%                                               | 90%                                   | 90%                         | 90%          | 90%                               | 20%                          | 90%                | 90%                                                                                   |
| 73         | 73 - Handicraft and printing workers                                                   | 90%                                             | 90%           | 90%           | 90%                                          | 90%                                        | 90%          | 90%                                                | 30%                        | 90%                                       | 90%                                      | 90%           | 90%               | 90%                                               | 90%                                   | 90%                         | 90%          | 90%                               | 30%                          | 90%                | 90%                                                                                   |
| 74         | 74 - Electrical and electronic trades workers                                          | 90%                                             | 90%           | 90%           | 90%                                          | 90%                                        | 90%          | 90%                                                | 20%                        | 90%                                       | 90%                                      | 90%           | 90%               | 90%                                               | 90%                                   | 90%                         | 90%          | 90%                               | 20%                          | 90%                | 90%                                                                                   |
| 75         | 75 - Food processing, wood working, garment and other craft and related trades workers | 90%                                             | 90%           | 90%           | 90%                                          | 90%                                        | 90%          | 90%                                                | 30%                        | 90%                                       | 90%                                      | 90%           | 90%               | 90%                                               | 90%                                   | 90%                         | 90%          | 90%                               | 30%                          | 90%                | 90%                                                                                   |
| 81         | 81 - Stationary plant and machine operators                                            | 90%                                             | 90%           | 90%           | 90%                                          | 90%                                        | 90%          | 90%                                                | 30%                        | 90%                                       | 90%                                      | 90%           | 90%               | 90%                                               | 90%                                   | 90%                         | 90%          | 90%                               | 30%                          | 90%                | 90%                                                                                   |
| 82         | 82 - Assemblers                                                                        | 90%                                             | 90%           | 90%           | 90%                                          | 90%                                        | 90%          | 90%                                                | 30%                        | 90%                                       | 90%                                      | 90%           | 90%               | 90%                                               | 90%                                   | 90%                         | 90%          | 90%                               | 30%                          | 90%                | 90%                                                                                   |
| 83         | 83 - Drivers and mobile plant operators                                                | 90%                                             | 90%           | 90%           | 90%                                          | 90%                                        | 90%          | 90%                                                | 20%                        | 90%                                       | 90%                                      | 90%           | 90%               | 90%                                               | 90%                                   | 90%                         | 90%          | 90%                               | 20%                          | 90%                | 90%                                                                                   |
| 91         | 91 - Cleaners and helpers                                                              | 90%                                             | 90%           | 90%           | 90%                                          | 90%                                        | 90%          | 90%                                                | 45%                        | 90%                                       | 90%                                      | 90%           | 90%               | 90%                                               | 90%                                   | 90%                         | 90%          | 90%                               | 45%                          | 90%                | 90%                                                                                   |
| 92         | 92 - Agricultural, forestry and fishery labourers                                      | 90%                                             | 90%           | 90%           | 90%                                          | 90%                                        | 90%          | 90%                                                | 90%                        | 90%                                       | 90%                                      | 90%           | 90%               | 90%                                               | 90%                                   | 90%                         | 90%          | 90%                               | 90%                          | 90%                | 90%                                                                                   |
| 93         | 93 - Labourers in mining, construction, manufacturing and transport                    | 90%                                             | 90%           | 90%           | 90%                                          | 90%                                        | 90%          | 90%                                                | 95%                        | 90%                                       | 90%                                      | 90%           | 90%               | 90%                                               | 90%                                   | 90%                         | 90%          | 90%                               | 95%                          | 90%                | 90%                                                                                   |
| 94         | 94 - Food preparation assistants                                                       | 90%                                             | 90%           | 90%           | 90%                                          | 90%                                        | 90%          | 90%                                                | 95%                        | 90%                                       | 90%                                      | 90%           | 90%               | 90%                                               | 90%                                   | 90%                         | 90%          | 90%                               | 95%                          | 90%                | 90%                                                                                   |
| 95         | 95 - Street and related sales and service workers                                      | 90%                                             | 90%           | 90%           | 90%                                          | 90%                                        | 90%          | 90%                                                | 45%                        | 90%                                       | 90%                                      | 90%           | 90%               | 90%                                               | 90%                                   | 90%                         | 90%          | 90%                               | 45%                          | 90%                | 90%                                                                                   |
| 96         | 96 - Refuse workers and other elementary workers                                       | 90%                                             | 90%           | 90%           | 90%                                          | 90%                                        | 90%          | 90%                                                | 45%                        | 90%                                       | 90%                                      | 90%           | 90%               | 90%                                               | 90%                                   | 90%                         | 90%          | 90%                               | 45%                          | 90%                | 90%                                                                                   |

Chile

Percent of jobs that were closed during lockdown

| Isc0 Nace | Occupation description                                                                 | A.                                              | B. Mining  | C.            | D.                              | E. Water supply;                           | F.           | G. Wholesale and                           | H.                         | I.                             | J.                            | K. Financial                       | L. Real                | M.                                     | N.                         | O. Public                   | P. Education | Q. Human                                | R. Arts,                           | S. Other                 | T. Activities of households                                                                      |
|-----------|----------------------------------------------------------------------------------------|-------------------------------------------------|------------|---------------|---------------------------------|--------------------------------------------|--------------|--------------------------------------------|----------------------------|--------------------------------|-------------------------------|------------------------------------|------------------------|----------------------------------------|----------------------------|-----------------------------|--------------|-----------------------------------------|------------------------------------|--------------------------|--------------------------------------------------------------------------------------------------|
|           |                                                                                        | Agriculture; and forestry and quarrying fishing | and mining | Manufacturing | Electricity; gas, steam and air | sewerage, waste management and remediation | Construction | retail trade; repair of motor vehicles and | Transportation and storage | Accommodation and food service | Information and communication | Insurance and financial activities | Real estate activities | Professional, scientific and technical | Administrative and support | administration and defence; |              | Human health and social work activities | Arts, entertainment and recreation | Other service activities | Activities of households as employers; undifferentiated goods- and services-producing activities |
|           |                                                                                        | A                                               | B          | C             | D                               | E                                          | F            | G                                          | H                          | I                              | J                             | K                                  | L                      | M                                      | N                          | O                           | P            | Q                                       | R                                  | S                        | T                                                                                                |
| 11        | 11 - Chief executives, senior officials and legislators                                | 0%                                              | 0%         | 0%            | 0%                              | 0%                                         | 0%           | 0%                                         | 20%                        | 0%                             | 0%                            | 0%                                 | 0%                     | 0%                                     | 0%                         | 0%                          | 0%           | 0%                                      | 0%                                 | 20%                      | 0%                                                                                               |
| 12        | 12 - Administrative and commercial managers                                            | 0%                                              | 0%         | 0%            | 0%                              | 0%                                         | 0%           | 0%                                         | 20%                        | 0%                             | 0%                            | 0%                                 | 0%                     | 0%                                     | 0%                         | 0%                          | 0%           | 0%                                      | 0%                                 | 20%                      | 0%                                                                                               |
| 13        | 13 - Production and specialised services managers                                      | 0%                                              | 0%         | 0%            | 0%                              | 0%                                         | 0%           | 0%                                         | 20%                        | 0%                             | 0%                            | 0%                                 | 0%                     | 0%                                     | 0%                         | 0%                          | 0%           | 0%                                      | 0%                                 | 20%                      | 0%                                                                                               |
| 14        | 14 - Hospitality, retail and other services managers                                   | 0%                                              | 0%         | 0%            | 0%                              | 0%                                         | 0%           | 0%                                         | 20%                        | 0%                             | 0%                            | 0%                                 | 0%                     | 0%                                     | 0%                         | 0%                          | 0%           | 0%                                      | 0%                                 | 20%                      | 0%                                                                                               |
| 21        | 21 - Science and engineering professionals                                             | 0%                                              | 0%         | 0%            | 0%                              | 0%                                         | 0%           | 0%                                         | 20%                        | 0%                             | 0%                            | 0%                                 | 0%                     | 0%                                     | 0%                         | 0%                          | 0%           | 0%                                      | 0%                                 | 20%                      | 0%                                                                                               |
| 22        | 22 - Health professionals                                                              | 0%                                              | 0%         | 0%            | 0%                              | 0%                                         | 0%           | 0%                                         | 0%                         | 0%                             | 0%                            | 0%                                 | 0%                     | 0%                                     | 0%                         | 0%                          | 0%           | 0%                                      | 0%                                 | 0%                       | 0%                                                                                               |
| 23        | 23 - Teaching professionals                                                            | 0%                                              | 0%         | 0%            | 0%                              | 0%                                         | 0%           | 0%                                         | 20%                        | 0%                             | 0%                            | 0%                                 | 0%                     | 0%                                     | 0%                         | 0%                          | 0%           | 0%                                      | 0%                                 | 20%                      | 0%                                                                                               |
| 24        | 24 - Business and administration professionals                                         | 0%                                              | 0%         | 0%            | 0%                              | 0%                                         | 0%           | 0%                                         | 20%                        | 0%                             | 0%                            | 0%                                 | 0%                     | 0%                                     | 0%                         | 0%                          | 0%           | 0%                                      | 0%                                 | 20%                      | 0%                                                                                               |
| 25        | 25 - Information and communications technology professionals                           | 0%                                              | 0%         | 0%            | 0%                              | 0%                                         | 0%           | 0%                                         | 20%                        | 0%                             | 0%                            | 0%                                 | 0%                     | 0%                                     | 0%                         | 0%                          | 0%           | 0%                                      | 0%                                 | 20%                      | 0%                                                                                               |
| 26        | 26 - Legal, social and cultural professionals                                          | 10%                                             | 10%        | 10%           | 10%                             | 10%                                        | 10%          | 20%                                        | 10%                        | 10%                            | 10%                           | 10%                                | 10%                    | 10%                                    | 10%                        | 10%                         | 10%          | 10%                                     | 10%                                | 20%                      | 10%                                                                                              |
| 31        | 31 - Science and engineering associate professionals                                   | 0%                                              | 0%         | 0%            | 0%                              | 0%                                         | 0%           | 0%                                         | 20%                        | 0%                             | 0%                            | 0%                                 | 0%                     | 0%                                     | 0%                         | 0%                          | 0%           | 0%                                      | 0%                                 | 20%                      | 0%                                                                                               |
| 32        | 32 - Health associate professionals                                                    | 0%                                              | 0%         | 0%            | 0%                              | 0%                                         | 0%           | 0%                                         | 0%                         | 0%                             | 0%                            | 0%                                 | 0%                     | 0%                                     | 0%                         | 0%                          | 0%           | 0%                                      | 0%                                 | 0%                       | 0%                                                                                               |
| 33        | 33 - Business and administration associate professionals                               | 0%                                              | 0%         | 0%            | 0%                              | 0%                                         | 0%           | 0%                                         | 20%                        | 0%                             | 0%                            | 0%                                 | 0%                     | 0%                                     | 0%                         | 0%                          | 0%           | 0%                                      | 0%                                 | 20%                      | 0%                                                                                               |
| 34        | 34 - Legal, social, cultural and related associate professionals                       | 10%                                             | 10%        | 10%           | 10%                             | 10%                                        | 10%          | 20%                                        | 10%                        | 10%                            | 10%                           | 10%                                | 10%                    | 10%                                    | 10%                        | 10%                         | 10%          | 10%                                     | 10%                                | 20%                      | 10%                                                                                              |
| 35        | 35 - Information and communications technicians                                        | 0%                                              | 0%         | 0%            | 0%                              | 0%                                         | 0%           | 0%                                         | 20%                        | 0%                             | 0%                            | 0%                                 | 0%                     | 0%                                     | 0%                         | 0%                          | 0%           | 0%                                      | 0%                                 | 20%                      | 0%                                                                                               |
| 41        | 41 - General and keyboard clerks                                                       | 0%                                              | 0%         | 0%            | 0%                              | 0%                                         | 0%           | 0%                                         | 50%                        | 0%                             | 0%                            | 0%                                 | 0%                     | 0%                                     | 0%                         | 0%                          | 0%           | 0%                                      | 0%                                 | 50%                      | 0%                                                                                               |
| 42        | 42 - Customer services clerks                                                          | 0%                                              | 0%         | 0%            | 0%                              | 0%                                         | 0%           | 0%                                         | 50%                        | 0%                             | 0%                            | 0%                                 | 0%                     | 0%                                     | 0%                         | 0%                          | 0%           | 0%                                      | 0%                                 | 50%                      | 0%                                                                                               |
| 43        | 43 - Numerical and material recording clerks                                           | 0%                                              | 0%         | 0%            | 0%                              | 0%                                         | 0%           | 0%                                         | 20%                        | 0%                             | 0%                            | 0%                                 | 0%                     | 0%                                     | 0%                         | 0%                          | 0%           | 0%                                      | 0%                                 | 20%                      | 0%                                                                                               |
| 44        | 44 - Other clerical support workers                                                    | 0%                                              | 0%         | 0%            | 0%                              | 0%                                         | 0%           | 0%                                         | 20%                        | 0%                             | 0%                            | 0%                                 | 0%                     | 0%                                     | 0%                         | 0%                          | 0%           | 0%                                      | 0%                                 | 20%                      | 0%                                                                                               |
| 51        | 51 - Personal service workers                                                          | 10%                                             | 10%        | 10%           | 10%                             | 10%                                        | 10%          | 50%                                        | 10%                        | 10%                            | 10%                           | 10%                                | 10%                    | 10%                                    | 10%                        | 10%                         | 10%          | 10%                                     | 10%                                | 50%                      | 10%                                                                                              |
| 52        | 52 - Sales workers                                                                     | 10%                                             | 10%        | 10%           | 10%                             | 10%                                        | 10%          | 50%                                        | 10%                        | 10%                            | 10%                           | 10%                                | 10%                    | 10%                                    | 10%                        | 10%                         | 10%          | 10%                                     | 10%                                | 50%                      | 10%                                                                                              |
| 53        | 53 - Personal care workers                                                             | 10%                                             | 10%        | 10%           | 10%                             | 10%                                        | 10%          | 50%                                        | 10%                        | 10%                            | 10%                           | 10%                                | 10%                    | 10%                                    | 10%                        | 10%                         | 10%          | 10%                                     | 10%                                | 50%                      | 10%                                                                                              |
| 54        | 54 - Protective services workers                                                       | 10%                                             | 10%        | 10%           | 10%                             | 10%                                        | 10%          | 50%                                        | 10%                        | 10%                            | 10%                           | 10%                                | 10%                    | 10%                                    | 10%                        | 10%                         | 10%          | 10%                                     | 10%                                | 50%                      | 10%                                                                                              |
| 61        | 61 - Market-oriented skilled agricultural workers                                      | 0%                                              | 0%         | 0%            | 0%                              | 0%                                         | 0%           | 0%                                         | 50%                        | 0%                             | 0%                            | 0%                                 | 0%                     | 0%                                     | 0%                         | 0%                          | 0%           | 0%                                      | 0%                                 | 50%                      | 0%                                                                                               |
| 62        | 62 - Market-oriented skilled forestry, fishery and hunting workers                     | 0%                                              | 0%         | 0%            | 0%                              | 0%                                         | 0%           | 0%                                         | 50%                        | 0%                             | 0%                            | 0%                                 | 0%                     | 0%                                     | 0%                         | 0%                          | 0%           | 0%                                      | 0%                                 | 50%                      | 0%                                                                                               |
| 63        | 63 - Subsistence farmers, fishers, hunters and gatherers                               | 0%                                              | 0%         | 0%            | 0%                              | 0%                                         | 0%           | 0%                                         | 0%                         | 0%                             | 0%                            | 0%                                 | 0%                     | 0%                                     | 0%                         | 0%                          | 0%           | 0%                                      | 0%                                 | 0%                       | 0%                                                                                               |
| 71        | 71 - Building and related trades workers, excluding electricians                       | 10%                                             | 10%        | 10%           | 10%                             | 10%                                        | 10%          | 20%                                        | 10%                        | 10%                            | 10%                           | 10%                                | 10%                    | 10%                                    | 10%                        | 10%                         | 10%          | 10%                                     | 10%                                | 20%                      | 10%                                                                                              |
| 72        | 72 - Metal, machinery and related trades workers                                       | 0%                                              | 0%         | 0%            | 0%                              | 0%                                         | 0%           | 0%                                         | 50%                        | 0%                             | 0%                            | 0%                                 | 0%                     | 0%                                     | 0%                         | 0%                          | 0%           | 0%                                      | 0%                                 | 50%                      | 0%                                                                                               |
| 73        | 73 - Handicraft and printing workers                                                   | 10%                                             | 10%        | 10%           | 10%                             | 10%                                        | 10%          | 50%                                        | 10%                        | 10%                            | 10%                           | 10%                                | 10%                    | 10%                                    | 10%                        | 10%                         | 10%          | 10%                                     | 10%                                | 50%                      | 10%                                                                                              |
| 74        | 74 - Electrical and electronic trades workers                                          | 0%                                              | 0%         | 0%            | 0%                              | 0%                                         | 0%           | 0%                                         | 20%                        | 0%                             | 0%                            | 0%                                 | 0%                     | 0%                                     | 0%                         | 0%                          | 0%           | 0%                                      | 0%                                 | 20%                      | 0%                                                                                               |
| 75        | 75 - Food processing, wood working, garment and other craft and related trades workers | 0%                                              | 0%         | 0%            | 0%                              | 0%                                         | 0%           | 0%                                         | 0%                         | 0%                             | 0%                            | 0%                                 | 0%                     | 0%                                     | 0%                         | 0%                          | 0%           | 0%                                      | 0%                                 | 0%                       | 0%                                                                                               |
| 81        | 81 - Stationary plant and machine operators                                            | 10%                                             | 10%        | 10%           | 10%                             | 10%                                        | 10%          | 20%                                        | 10%                        | 10%                            | 10%                           | 10%                                | 10%                    | 10%                                    | 10%                        | 10%                         | 10%          | 10%                                     | 10%                                | 20%                      | 10%                                                                                              |
| 82        | 82 - Assemblers                                                                        | 10%                                             | 10%        | 10%           | 10%                             | 10%                                        | 10%          | 20%                                        | 10%                        | 10%                            | 10%                           | 10%                                | 10%                    | 10%                                    | 10%                        | 10%                         | 10%          | 10%                                     | 10%                                | 20%                      | 10%                                                                                              |
| 83        | 83 - Drivers and mobile plant operators                                                | 10%                                             | 10%        | 10%           | 10%                             | 10%                                        | 10%          | 20%                                        | 10%                        | 10%                            | 10%                           | 10%                                | 10%                    | 10%                                    | 10%                        | 10%                         | 10%          | 10%                                     | 10%                                | 20%                      | 10%                                                                                              |
| 91        | 91 - Cleaners and helpers                                                              | 10%                                             | 10%        | 10%           | 10%                             | 10%                                        | 10%          | 20%                                        | 10%                        | 10%                            | 10%                           | 10%                                | 10%                    | 10%                                    | 10%                        | 10%                         | 10%          | 10%                                     | 10%                                | 20%                      | 10%                                                                                              |
| 92        | 92 - Agricultural, forestry and fishery labourers                                      | 0%                                              | 0%         | 0%            | 0%                              | 0%                                         | 0%           | 0%                                         | 0%                         | 0%                             | 0%                            | 0%                                 | 0%                     | 0%                                     | 0%                         | 0%                          | 0%           | 0%                                      | 0%                                 | 0%                       | 0%                                                                                               |
| 93        | 93 - Labourers in mining, construction, manufacturing and transport                    | 0%                                              | 0%         | 0%            | 0%                              | 0%                                         | 0%           | 0%                                         | 5%                         | 0%                             | 0%                            | 0%                                 | 0%                     | 0%                                     | 0%                         | 0%                          | 0%           | 0%                                      | 0%                                 | 5%                       | 0%                                                                                               |
| 94        | 94 - Food preparation assistants                                                       | 0%                                              | 0%         | 0%            | 0%                              | 0%                                         | 0%           | 0%                                         | 5%                         | 0%                             | 0%                            | 0%                                 | 0%                     | 0%                                     | 0%                         | 0%                          | 0%           | 0%                                      | 0%                                 | 5%                       | 0%                                                                                               |
| 95        | 95 - Street and related sales and service workers                                      | 0%                                              | 0%         | 0%            | 0%                              | 0%                                         | 0%           | 0%                                         | 20%                        | 0%                             | 0%                            | 0%                                 | 0%                     | 0%                                     | 0%                         | 0%                          | 0%           | 0%                                      | 0%                                 | 20%                      | 0%                                                                                               |
| 96        | 96 - Refuse workers and other elementary workers                                       | 0%                                              | 0%         | 0%            | 0%                              | 0%                                         | 0%           | 0%                                         | 20%                        | 0%                             | 0%                            | 0%                                 | 0%                     | 0%                                     | 0%                         | 0%                          | 0%           | 0%                                      | 0%                                 | 20%                      | 0%                                                                                               |

Chile

Percent of jobs subject to teleworking during lockdown

| Isc0 | Nace | Occupation description                                                            | A.                                    | B. Mining     | C.            | D.                              | E. Water supply;                           | F.           | G. Wholesale and                           | H.                         | I.                             | J.                                       | K. Financial                       | L. Real                | M.                                                | N.                                    | O. Public                         | P. Education | Q. Human                                | R. Arts,                           | S. Other                 | T. Activities of households                                                                      |
|------|------|-----------------------------------------------------------------------------------|---------------------------------------|---------------|---------------|---------------------------------|--------------------------------------------|--------------|--------------------------------------------|----------------------------|--------------------------------|------------------------------------------|------------------------------------|------------------------|---------------------------------------------------|---------------------------------------|-----------------------------------|--------------|-----------------------------------------|------------------------------------|--------------------------|--------------------------------------------------------------------------------------------------|
|      |      |                                                                                   | Agriculture; and forestry and fishing | and quarrying | Manufacturing | Electricity; gas, steam and air | sewerage, waste management and remediation | Construction | retail trade; repair of motor vehicles and | Transportation and storage | Accommodation and food service | Information and communication activities | Insurance and financial activities | Real estate activities | Professional, scientific and technical activities | Administrative and support activities | Public administration and defence | Education    | Human health and social work activities | Arts, entertainment and recreation | Other service activities | Activities of households as employers; undifferentiated goods- and services-producing activities |
|      |      |                                                                                   | A                                     | B             | C             | D                               | E                                          | F            | G                                          | H                          | I                              | J                                        | K                                  | L                      | M                                                 | N                                     | O                                 | P            | Q                                       | R                                  | S                        | T                                                                                                |
| 11   | 11   | Chief executives, senior officials and legislators                                | 80%                                   | 80%           | 80%           | 80%                             | 80%                                        | 80%          | 80%                                        | 80%                        | 80%                            | 80%                                      | 80%                                | 80%                    | 80%                                               | 80%                                   | 80%                               | 80%          | 80%                                     | 80%                                | 80%                      | 80%                                                                                              |
| 12   | 12   | Administrative and commercial managers                                            | 90%                                   | 90%           | 90%           | 90%                             | 90%                                        | 90%          | 90%                                        | 90%                        | 90%                            | 90%                                      | 90%                                | 90%                    | 90%                                               | 90%                                   | 90%                               | 90%          | 90%                                     | 90%                                | 90%                      | 90%                                                                                              |
| 13   | 13   | Production and specialised services managers                                      | 60%                                   | 60%           | 60%           | 60%                             | 60%                                        | 60%          | 60%                                        | 60%                        | 60%                            | 60%                                      | 60%                                | 60%                    | 60%                                               | 60%                                   | 60%                               | 60%          | 60%                                     | 60%                                | 60%                      | 60%                                                                                              |
| 14   | 14   | Hospitality, retail and other services managers                                   | 80%                                   | 80%           | 80%           | 80%                             | 80%                                        | 80%          | 80%                                        | 80%                        | 80%                            | 80%                                      | 80%                                | 80%                    | 80%                                               | 80%                                   | 80%                               | 80%          | 80%                                     | 80%                                | 80%                      | 80%                                                                                              |
| 21   | 21   | Science and engineering professionals                                             | 80%                                   | 80%           | 80%           | 80%                             | 80%                                        | 80%          | 80%                                        | 80%                        | 80%                            | 80%                                      | 80%                                | 80%                    | 80%                                               | 80%                                   | 80%                               | 80%          | 80%                                     | 80%                                | 80%                      | 80%                                                                                              |
| 22   | 22   | Health professionals                                                              | 20%                                   | 20%           | 20%           | 20%                             | 20%                                        | 20%          | 20%                                        | 20%                        | 20%                            | 20%                                      | 20%                                | 20%                    | 20%                                               | 20%                                   | 20%                               | 20%          | 20%                                     | 20%                                | 20%                      | 20%                                                                                              |
| 23   | 23   | Teaching professionals                                                            | 80%                                   | 80%           | 80%           | 80%                             | 80%                                        | 80%          | 80%                                        | 80%                        | 80%                            | 80%                                      | 80%                                | 80%                    | 80%                                               | 80%                                   | 80%                               | 80%          | 80%                                     | 80%                                | 80%                      | 80%                                                                                              |
| 24   | 24   | Business and administration professionals                                         | 80%                                   | 80%           | 80%           | 80%                             | 80%                                        | 80%          | 80%                                        | 80%                        | 80%                            | 80%                                      | 80%                                | 80%                    | 80%                                               | 80%                                   | 80%                               | 80%          | 80%                                     | 80%                                | 80%                      | 80%                                                                                              |
| 25   | 25   | Information and communications technology professionals                           | 80%                                   | 80%           | 80%           | 80%                             | 80%                                        | 80%          | 80%                                        | 80%                        | 80%                            | 80%                                      | 80%                                | 80%                    | 80%                                               | 80%                                   | 80%                               | 80%          | 80%                                     | 80%                                | 80%                      | 80%                                                                                              |
| 26   | 26   | Legal, social and cultural professionals                                          | 70%                                   | 70%           | 70%           | 70%                             | 70%                                        | 70%          | 70%                                        | 70%                        | 70%                            | 70%                                      | 70%                                | 70%                    | 70%                                               | 70%                                   | 70%                               | 70%          | 70%                                     | 70%                                | 70%                      | 70%                                                                                              |
| 31   | 31   | Science and engineering associate professionals                                   | 80%                                   | 80%           | 80%           | 80%                             | 80%                                        | 80%          | 80%                                        | 80%                        | 80%                            | 80%                                      | 80%                                | 80%                    | 80%                                               | 80%                                   | 80%                               | 80%          | 80%                                     | 80%                                | 80%                      | 80%                                                                                              |
| 32   | 32   | Health associate professionals                                                    | 20%                                   | 20%           | 20%           | 20%                             | 20%                                        | 20%          | 20%                                        | 20%                        | 20%                            | 20%                                      | 20%                                | 20%                    | 20%                                               | 20%                                   | 20%                               | 20%          | 20%                                     | 20%                                | 20%                      | 20%                                                                                              |
| 33   | 33   | Business and administration associate professionals                               | 80%                                   | 80%           | 80%           | 80%                             | 80%                                        | 80%          | 80%                                        | 80%                        | 80%                            | 80%                                      | 80%                                | 80%                    | 80%                                               | 80%                                   | 80%                               | 80%          | 80%                                     | 80%                                | 80%                      | 80%                                                                                              |
| 34   | 34   | Legal, social, cultural and related associate professionals                       | 70%                                   | 70%           | 70%           | 70%                             | 70%                                        | 70%          | 70%                                        | 70%                        | 70%                            | 70%                                      | 70%                                | 70%                    | 70%                                               | 70%                                   | 70%                               | 70%          | 70%                                     | 70%                                | 70%                      | 70%                                                                                              |
| 35   | 35   | Information and communications technicians                                        | 80%                                   | 80%           | 80%           | 80%                             | 80%                                        | 80%          | 80%                                        | 80%                        | 80%                            | 80%                                      | 80%                                | 80%                    | 80%                                               | 80%                                   | 80%                               | 80%          | 80%                                     | 80%                                | 80%                      | 80%                                                                                              |
| 41   | 41   | General and keyboard clerks                                                       | 80%                                   | 80%           | 80%           | 80%                             | 80%                                        | 80%          | 80%                                        | 30%                        | 80%                            | 80%                                      | 80%                                | 80%                    | 80%                                               | 80%                                   | 80%                               | 80%          | 80%                                     | 80%                                | 30%                      | 80%                                                                                              |
| 42   | 42   | Customer services clerks                                                          | 80%                                   | 80%           | 80%           | 80%                             | 80%                                        | 80%          | 30%                                        | 80%                        | 80%                            | 80%                                      | 80%                                | 80%                    | 80%                                               | 80%                                   | 80%                               | 80%          | 80%                                     | 80%                                | 30%                      | 80%                                                                                              |
| 43   | 43   | Numerical and material recording clerks                                           | 80%                                   | 80%           | 80%           | 80%                             | 80%                                        | 80%          | 60%                                        | 80%                        | 80%                            | 80%                                      | 80%                                | 80%                    | 80%                                               | 80%                                   | 80%                               | 80%          | 80%                                     | 80%                                | 60%                      | 80%                                                                                              |
| 44   | 44   | Other clerical support workers                                                    | 80%                                   | 80%           | 80%           | 80%                             | 80%                                        | 80%          | 60%                                        | 80%                        | 80%                            | 80%                                      | 80%                                | 80%                    | 80%                                               | 80%                                   | 80%                               | 80%          | 80%                                     | 80%                                | 60%                      | 80%                                                                                              |
| 51   | 51   | Personal service workers                                                          | 40%                                   | 40%           | 40%           | 40%                             | 40%                                        | 40%          | 20%                                        | 40%                        | 40%                            | 40%                                      | 40%                                | 40%                    | 40%                                               | 40%                                   | 40%                               | 40%          | 40%                                     | 40%                                | 20%                      | 40%                                                                                              |
| 52   | 52   | Sales workers                                                                     | 20%                                   | 20%           | 20%           | 20%                             | 20%                                        | 20%          | 20%                                        | 20%                        | 20%                            | 20%                                      | 20%                                | 20%                    | 20%                                               | 20%                                   | 20%                               | 20%          | 20%                                     | 20%                                | 20%                      | 20%                                                                                              |
| 53   | 53   | Personal care workers                                                             | 40%                                   | 40%           | 40%           | 40%                             | 40%                                        | 40%          | 0%                                         | 40%                        | 40%                            | 40%                                      | 40%                                | 40%                    | 40%                                               | 40%                                   | 40%                               | 40%          | 40%                                     | 0%                                 | 40%                      | 40%                                                                                              |
| 54   | 54   | Protective services workers                                                       | 40%                                   | 40%           | 40%           | 40%                             | 40%                                        | 40%          | 30%                                        | 40%                        | 40%                            | 40%                                      | 40%                                | 40%                    | 40%                                               | 40%                                   | 40%                               | 40%          | 40%                                     | 40%                                | 30%                      | 40%                                                                                              |
| 61   | 61   | Market-oriented skilled agricultural workers                                      | 10%                                   | 10%           | 10%           | 10%                             | 10%                                        | 10%          | 10%                                        | 0%                         | 10%                            | 10%                                      | 10%                                | 10%                    | 10%                                               | 10%                                   | 10%                               | 10%          | 10%                                     | 10%                                | 0%                       | 10%                                                                                              |
| 62   | 62   | Market-oriented skilled forestry, fishery and hunting workers                     | 10%                                   | 10%           | 10%           | 10%                             | 10%                                        | 10%          | 10%                                        | 0%                         | 10%                            | 10%                                      | 10%                                | 10%                    | 10%                                               | 10%                                   | 10%                               | 10%          | 10%                                     | 10%                                | 0%                       | 10%                                                                                              |
| 63   | 63   | Subsistence farmers, fishers, hunters and gatherers                               | 0%                                    | 0%            | 0%            | 0%                              | 0%                                         | 0%           | 0%                                         | 0%                         | 0%                             | 0%                                       | 0%                                 | 0%                     | 0%                                                | 0%                                    | 0%                                | 0%           | 0%                                      | 0%                                 | 0%                       | 0%                                                                                               |
| 71   | 71   | Building and related trades workers, excluding electricians                       | 0%                                    | 0%            | 0%            | 0%                              | 0%                                         | 0%           | 0%                                         | 50%                        | 0%                             | 0%                                       | 0%                                 | 0%                     | 0%                                                | 0%                                    | 0%                                | 0%           | 0%                                      | 0%                                 | 50%                      | 0%                                                                                               |
| 72   | 72   | Metal, machinery and related trades workers                                       | 10%                                   | 10%           | 10%           | 10%                             | 10%                                        | 10%          | 10%                                        | 30%                        | 10%                            | 10%                                      | 10%                                | 10%                    | 10%                                               | 10%                                   | 10%                               | 10%          | 10%                                     | 10%                                | 30%                      | 10%                                                                                              |
| 73   | 73   | Handicraft and printing workers                                                   | 0%                                    | 0%            | 0%            | 0%                              | 0%                                         | 0%           | 0%                                         | 20%                        | 0%                             | 0%                                       | 0%                                 | 0%                     | 0%                                                | 0%                                    | 0%                                | 0%           | 0%                                      | 0%                                 | 20%                      | 0%                                                                                               |
| 74   | 74   | Electrical and electronic trades workers                                          | 10%                                   | 10%           | 10%           | 10%                             | 10%                                        | 10%          | 60%                                        | 10%                        | 10%                            | 10%                                      | 10%                                | 10%                    | 10%                                               | 10%                                   | 10%                               | 10%          | 10%                                     | 10%                                | 60%                      | 10%                                                                                              |
| 75   | 75   | Food processing, wood working, garment and other craft and related trades workers | 10%                                   | 10%           | 10%           | 10%                             | 10%                                        | 10%          | 70%                                        | 10%                        | 10%                            | 10%                                      | 10%                                | 10%                    | 10%                                               | 10%                                   | 10%                               | 10%          | 10%                                     | 10%                                | 70%                      | 10%                                                                                              |
| 81   | 81   | Stationary plant and machine operators                                            | 0%                                    | 0%            | 0%            | 0%                              | 0%                                         | 0%           | 50%                                        | 0%                         | 0%                             | 0%                                       | 0%                                 | 0%                     | 0%                                                | 0%                                    | 0%                                | 0%           | 0%                                      | 0%                                 | 50%                      | 0%                                                                                               |
| 82   | 82   | Assemblers                                                                        | 0%                                    | 0%            | 0%            | 0%                              | 0%                                         | 0%           | 50%                                        | 0%                         | 0%                             | 0%                                       | 0%                                 | 0%                     | 0%                                                | 0%                                    | 0%                                | 0%           | 0%                                      | 0%                                 | 50%                      | 0%                                                                                               |
| 83   | 83   | Drivers and mobile plant operators                                                | 0%                                    | 0%            | 0%            | 0%                              | 0%                                         | 0%           | 60%                                        | 0%                         | 0%                             | 0%                                       | 0%                                 | 0%                     | 0%                                                | 0%                                    | 0%                                | 0%           | 0%                                      | 0%                                 | 60%                      | 0%                                                                                               |
| 91   | 91   | Cleaners and helpers                                                              | 0%                                    | 0%            | 0%            | 0%                              | 0%                                         | 0%           | 35%                                        | 0%                         | 0%                             | 0%                                       | 0%                                 | 0%                     | 0%                                                | 0%                                    | 0%                                | 0%           | 0%                                      | 35%                                | 0%                       | 0%                                                                                               |
| 92   | 92   | Agricultural, forestry and fishery labourers                                      | 10%                                   | 10%           | 10%           | 10%                             | 10%                                        | 10%          | 10%                                        | 10%                        | 10%                            | 10%                                      | 10%                                | 10%                    | 10%                                               | 10%                                   | 10%                               | 10%          | 10%                                     | 10%                                | 10%                      | 10%                                                                                              |
| 93   | 93   | Labourers in mining, construction, manufacturing and transport                    | 10%                                   | 10%           | 10%           | 10%                             | 10%                                        | 10%          | 0%                                         | 10%                        | 10%                            | 10%                                      | 10%                                | 10%                    | 10%                                               | 10%                                   | 10%                               | 10%          | 10%                                     | 10%                                | 0%                       | 10%                                                                                              |
| 94   | 94   | Food preparation assistants                                                       | 10%                                   | 10%           | 10%           | 10%                             | 10%                                        | 10%          | 0%                                         | 10%                        | 10%                            | 10%                                      | 10%                                | 10%                    | 10%                                               | 10%                                   | 10%                               | 10%          | 10%                                     | 10%                                | 0%                       | 10%                                                                                              |
| 95   | 95   | Street and related sales and service workers                                      | 10%                                   | 10%           | 10%           | 10%                             | 10%                                        | 10%          | 35%                                        | 10%                        | 10%                            | 10%                                      | 10%                                | 10%                    | 10%                                               | 10%                                   | 10%                               | 10%          | 10%                                     | 10%                                | 35%                      | 10%                                                                                              |
| 96   | 96   | Refuse workers and other elementary workers                                       | 10%                                   | 10%           | 10%           | 10%                             | 10%                                        | 10%          | 10%                                        | 35%                        | 10%                            | 10%                                      | 10%                                | 10%                    | 10%                                               | 10%                                   | 10%                               | 10%          | 10%                                     | 10%                                | 35%                      | 10%                                                                                              |

United Kingdom

COVID reached the United Kingdom in late January, 2020. The government introduced a range of measures to mitigate the spread of COVID-19 including travel restrictions, social distancing measures, closures of entertainment, hospitality, non-essential shops and indoor premises, and increased testing. A national lockdown was introduced on 23 March. Essential workers included health and social care, education and childcare, key public services (including those essential to the running of the justice system, religious staff, charities and workers delivering key frontline services, and journalists and broadcasters who are providing public service broadcasting), local and national government, public safety and national security, transport, utilities, communication and financial services (including staff needed for essential financial services provision, the oil, gas, electricity and water sectors, information technology and data infrastructure sector and primary industry supplies to continue during the COVID-19 response, as well as key staff working in the civil nuclear, chemicals, telecommunications, postal services and delivery, payments providers and waste disposal sectors). The government have encouraged businesses and workplaces to encourage their employees to work at home, wherever possible.

Percent of jobs that were essential during lockdown

| Isco.Nace | Occupation description                                                                 | A.                                    | B.                   | C.            | D.                                                  | E.                                                       | F.           | G.                                                                   | H.                    | I.                            | J.                      | K.                     | L.                                                | M.                                    | N.                                | O.        | P.                                      | Q.                                 | R.                       | S.                                                                                               | T.   |
|-----------|----------------------------------------------------------------------------------------|---------------------------------------|----------------------|---------------|-----------------------------------------------------|----------------------------------------------------------|--------------|----------------------------------------------------------------------|-----------------------|-------------------------------|-------------------------|------------------------|---------------------------------------------------|---------------------------------------|-----------------------------------|-----------|-----------------------------------------|------------------------------------|--------------------------|--------------------------------------------------------------------------------------------------|------|
|           |                                                                                        | Agriculture; and forestry and fishing | Mining and quarrying | Manufacturing | Electricity, gas, steam and air conditioning supply | Water supply; sewerage, waste management and remediation | Construction | Wholesale and retail trade; repair of motor vehicles and motorcycles | Transport and storage | Information and communication | Financial and insurance | Real estate activities | Professional, scientific and technical activities | Administrative and support activities | Public administration and defence | Education | Human health and social work activities | Arts, entertainment and recreation | Other service activities | Activities of households as employers; undifferentiated goods- and services-producing activities |      |
| 11        | 11 - Chief executives, senior officials and legislators                                | 100%                                  | 10%                  | 10%           | 10%                                                 | 10%                                                      | 0%           | 0%                                                                   | 0%                    | 50%                           | 0%                      | 25%                    | 25%                                               | 0%                                    | 0%                                | 100%      | 0%                                      | 100%                               | 0%                       | 0%                                                                                               |      |
| 12        | 12 - Administrative and commercial managers                                            | 100%                                  | 10%                  | 10%           | 10%                                                 | 10%                                                      | 0%           | 0%                                                                   | 0%                    | 50%                           | 0%                      | 25%                    | 25%                                               | 0%                                    | 0%                                | 100%      | 0%                                      | 100%                               | 0%                       | 0%                                                                                               |      |
| 13        | 13 - Production and specialised services managers                                      | 100%                                  | 10%                  | 10%           | 10%                                                 | 10%                                                      | 0%           | 0%                                                                   | 0%                    | 50%                           | 0%                      | 25%                    | 25%                                               | 0%                                    | 0%                                | 100%      | 0%                                      | 100%                               | 0%                       | 0%                                                                                               |      |
| 14        | 14 - Hospitality, retail and other services managers                                   | 100%                                  | 10%                  | 10%           | 10%                                                 | 10%                                                      | 0%           | 0%                                                                   | 0%                    | 50%                           | 0%                      | 25%                    | 25%                                               | 0%                                    | 0%                                | 100%      | 0%                                      | 100%                               | 0%                       | 0%                                                                                               |      |
| 21        | 21 - Science and engineering professionals                                             | 100%                                  | 10%                  | 10%           | 10%                                                 | 10%                                                      | 0%           | 0%                                                                   | 0%                    | 50%                           | 0%                      | 25%                    | 25%                                               | 0%                                    | 0%                                | 100%      | 0%                                      | 100%                               | 0%                       | 0%                                                                                               |      |
| 22        | 22 - Health professionals                                                              | 100%                                  | 100%                 | 100%          | 100%                                                | 100%                                                     | 100%         | 100%                                                                 | 100%                  | 100%                          | 100%                    | 100%                   | 100%                                              | 100%                                  | 100%                              | 100%      | 100%                                    | 100%                               | 100%                     | 100%                                                                                             | 100% |
| 23        | 23 - Teaching professionals                                                            | 100%                                  | 20%                  | 20%           | 20%                                                 | 20%                                                      | 20%          | 20%                                                                  | 0%                    | 20%                           | 0%                      | 20%                    | 20%                                               | 20%                                   | 20%                               | 100%      | 20%                                     | 0%                                 | 0%                       | 20%                                                                                              |      |
| 24        | 24 - Business and administration professionals                                         | 100%                                  | 10%                  | 10%           | 10%                                                 | 10%                                                      | 0%           | 0%                                                                   | 0%                    | 50%                           | 0%                      | 25%                    | 25%                                               | 0%                                    | 0%                                | 100%      | 0%                                      | 100%                               | 0%                       | 0%                                                                                               |      |
| 25        | 25 - Information and communications technology professionals                           | 100%                                  | 10%                  | 10%           | 10%                                                 | 10%                                                      | 0%           | 0%                                                                   | 0%                    | 0%                            | 0%                      | 25%                    | 25%                                               | 0%                                    | 0%                                | 100%      | 0%                                      | 100%                               | 0%                       | 0%                                                                                               |      |
| 26        | 26 - Legal, social and cultural professionals                                          | 100%                                  | 0%                   | 0%            | 0%                                                  | 0%                                                       | 0%           | 0%                                                                   | 0%                    | 0%                            | 0%                      | 0%                     | 0%                                                | 0%                                    | 0%                                | 100%      | 0%                                      | 0%                                 | 0%                       | 0%                                                                                               |      |
| 31        | 31 - Science and engineering associate professionals                                   | 100%                                  | 10%                  | 10%           | 10%                                                 | 10%                                                      | 0%           | 0%                                                                   | 0%                    | 50%                           | 0%                      | 25%                    | 25%                                               | 0%                                    | 0%                                | 100%      | 0%                                      | 100%                               | 0%                       | 0%                                                                                               |      |
| 32        | 32 - Health associate professionals                                                    | 100%                                  | 100%                 | 100%          | 100%                                                | 100%                                                     | 100%         | 100%                                                                 | 100%                  | 100%                          | 100%                    | 100%                   | 100%                                              | 100%                                  | 100%                              | 100%      | 100%                                    | 100%                               | 100%                     | 100%                                                                                             |      |
| 33        | 33 - Business and administration associate professionals                               | 100%                                  | 10%                  | 10%           | 10%                                                 | 10%                                                      | 0%           | 0%                                                                   | 0%                    | 50%                           | 0%                      | 25%                    | 25%                                               | 0%                                    | 0%                                | 100%      | 0%                                      | 100%                               | 0%                       | 0%                                                                                               |      |
| 34        | 34 - Legal, social, cultural and related associate professionals                       | 100%                                  | 0%                   | 0%            | 0%                                                  | 0%                                                       | 0%           | 0%                                                                   | 0%                    | 0%                            | 0%                      | 0%                     | 0%                                                | 0%                                    | 0%                                | 100%      | 0%                                      | 100%                               | 0%                       | 0%                                                                                               |      |
| 35        | 35 - Information and communications technicians                                        | 100%                                  | 10%                  | 10%           | 10%                                                 | 10%                                                      | 0%           | 0%                                                                   | 0%                    | 50%                           | 0%                      | 25%                    | 25%                                               | 0%                                    | 0%                                | 100%      | 0%                                      | 100%                               | 0%                       | 0%                                                                                               |      |
| 41        | 41 - General and keyboard clerks                                                       | 100%                                  | 10%                  | 10%           | 10%                                                 | 10%                                                      | 0%           | 0%                                                                   | 0%                    | 50%                           | 0%                      | 25%                    | 25%                                               | 0%                                    | 0%                                | 100%      | 0%                                      | 100%                               | 0%                       | 0%                                                                                               |      |
| 42        | 42 - Customer services clerks                                                          | 100%                                  | 10%                  | 10%           | 10%                                                 | 10%                                                      | 0%           | 0%                                                                   | 0%                    | 50%                           | 0%                      | 25%                    | 25%                                               | 0%                                    | 0%                                | 100%      | 0%                                      | 100%                               | 0%                       | 0%                                                                                               |      |
| 43        | 43 - Numerical and material recording clerks                                           | 100%                                  | 10%                  | 10%           | 10%                                                 | 10%                                                      | 0%           | 0%                                                                   | 0%                    | 50%                           | 0%                      | 25%                    | 25%                                               | 0%                                    | 0%                                | 100%      | 0%                                      | 100%                               | 0%                       | 0%                                                                                               |      |
| 44        | 44 - Other clerical support workers                                                    | 100%                                  | 10%                  | 10%           | 10%                                                 | 10%                                                      | 0%           | 0%                                                                   | 0%                    | 50%                           | 0%                      | 25%                    | 25%                                               | 0%                                    | 0%                                | 100%      | 0%                                      | 100%                               | 0%                       | 0%                                                                                               |      |
| 51        | 51 - Personal service workers                                                          | 100%                                  | 0%                   | 0%            | 0%                                                  | 0%                                                       | 0%           | 0%                                                                   | 0%                    | 0%                            | 0%                      | 0%                     | 0%                                                | 0%                                    | 0%                                | 100%      | 0%                                      | 0%                                 | 0%                       | 0%                                                                                               |      |
| 52        | 52 - Sales workers                                                                     | 100%                                  | 0%                   | 0%            | 0%                                                  | 0%                                                       | 0%           | 0%                                                                   | 0%                    | 0%                            | 0%                      | 0%                     | 0%                                                | 0%                                    | 0%                                | 100%      | 0%                                      | 0%                                 | 0%                       | 0%                                                                                               |      |
| 53        | 53 - Personal care workers                                                             | 100%                                  | 10%                  | 10%           | 10%                                                 | 10%                                                      | 0%           | 0%                                                                   | 0%                    | 100%                          | 0%                      | 0%                     | 0%                                                | 0%                                    | 0%                                | 100%      | 0%                                      | 100%                               | 0%                       | 0%                                                                                               |      |
| 54        | 54 - Protective services workers                                                       | 100%                                  | 10%                  | 10%           | 10%                                                 | 10%                                                      | 0%           | 0%                                                                   | 0%                    | 0%                            | 0%                      | 25%                    | 25%                                               | 0%                                    | 0%                                | 100%      | 0%                                      | 100%                               | 0%                       | 0%                                                                                               |      |
| 61        | 61 - Market-oriented skilled agricultural workers                                      | 100%                                  | 10%                  | 10%           | 10%                                                 | 10%                                                      | 0%           | 0%                                                                   | 0%                    | 0%                            | 0%                      | 25%                    | 25%                                               | 100%                                  | 100%                              | 100%      | 0%                                      | 0%                                 | 100%                     | 100%                                                                                             |      |
| 62        | 62 - Market-oriented skilled forestry, fishery and hunting workers                     | 100%                                  | 10%                  | 10%           | 10%                                                 | 10%                                                      | 0%           | 0%                                                                   | 0%                    | 0%                            | 0%                      | 25%                    | 25%                                               | 0%                                    | 0%                                | 100%      | 0%                                      | 0%                                 | 0%                       | 0%                                                                                               |      |
| 63        | 63 - Subsistence farmers, fishers, hunters and gatherers                               | 100%                                  | 100%                 | 100%          | 100%                                                | 100%                                                     | 100%         | 100%                                                                 | 100%                  | 100%                          | 100%                    | 100%                   | 100%                                              | 100%                                  | 100%                              | 100%      | 100%                                    | 100%                               | 100%                     | 100%                                                                                             |      |
| 71        | 71 - Building and related trades workers, excluding electricians                       | 100%                                  | 10%                  | 10%           | 10%                                                 | 10%                                                      | 0%           | 0%                                                                   | 0%                    | 0%                            | 0%                      | 25%                    | 25%                                               | 0%                                    | 0%                                | 100%      | 0%                                      | 0%                                 | 0%                       | 0%                                                                                               |      |
| 72        | 72 - Metal, machinery and related trades workers                                       | 100%                                  | 10%                  | 10%           | 10%                                                 | 10%                                                      | 0%           | 0%                                                                   | 0%                    | 0%                            | 0%                      | 25%                    | 25%                                               | 0%                                    | 0%                                | 100%      | 0%                                      | 0%                                 | 0%                       | 0%                                                                                               |      |
| 73        | 73 - Handicraft and printing workers                                                   | 100%                                  | 10%                  | 10%           | 10%                                                 | 10%                                                      | 0%           | 0%                                                                   | 0%                    | 0%                            | 0%                      | 25%                    | 25%                                               | 0%                                    | 0%                                | 100%      | 0%                                      | 0%                                 | 0%                       | 0%                                                                                               |      |
| 74        | 74 - Electrical and electronic trades workers                                          | 100%                                  | 10%                  | 10%           | 10%                                                 | 10%                                                      | 0%           | 0%                                                                   | 0%                    | 0%                            | 0%                      | 25%                    | 25%                                               | 0%                                    | 0%                                | 100%      | 0%                                      | 100%                               | 0%                       | 0%                                                                                               |      |
| 75        | 75 - Food processing, wood working, garment and other craft and related trades workers | 100%                                  | 10%                  | 10%           | 10%                                                 | 10%                                                      | 0%           | 0%                                                                   | 0%                    | 0%                            | 0%                      | 25%                    | 25%                                               | 0%                                    | 0%                                | 100%      | 0%                                      | 0%                                 | 0%                       | 0%                                                                                               |      |
| 81        | 81 - Stationary plant and machine operators                                            | 100%                                  | 10%                  | 10%           | 10%                                                 | 10%                                                      | 0%           | 0%                                                                   | 0%                    | 0%                            | 0%                      | 25%                    | 25%                                               | 0%                                    | 0%                                | 100%      | 0%                                      | 0%                                 | 0%                       | 0%                                                                                               |      |
| 82        | 82 - Assemblers                                                                        | 100%                                  | 10%                  | 10%           | 10%                                                 | 10%                                                      | 0%           | 0%                                                                   | 0%                    | 0%                            | 0%                      | 25%                    | 25%                                               | 0%                                    | 0%                                | 100%      | 0%                                      | 0%                                 | 0%                       | 0%                                                                                               |      |
| 83        | 83 - Drivers and mobile plant operators                                                | 100%                                  | 10%                  | 10%           | 10%                                                 | 10%                                                      | 0%           | 0%                                                                   | 0%                    | 50%                           | 25%                     | 25%                    | 25%                                               | 0%                                    | 0%                                | 100%      | 0%                                      | 50%                                | 0%                       | 0%                                                                                               |      |
| 91        | 91 - Cleaners and helpers                                                              | 100%                                  | 10%                  | 10%           | 10%                                                 | 10%                                                      | 0%           | 0%                                                                   | 0%                    | 0%                            | 0%                      | 25%                    | 25%                                               | 0%                                    | 0%                                | 100%      | 0%                                      | 100%                               | 0%                       | 0%                                                                                               |      |
| 92        | 92 - Agricultural, forestry and fishery labourers                                      | 100%                                  | 10%                  | 10%           | 10%                                                 | 10%                                                      | 0%           | 0%                                                                   | 0%                    | 50%                           | 0%                      | 25%                    | 25%                                               | 0%                                    | 0%                                | 100%      | 0%                                      | 0%                                 | 0%                       | 0%                                                                                               |      |
| 93        | 93 - Labourers in mining, construction, manufacturing and transport                    | 100%                                  | 10%                  | 10%           | 10%                                                 | 10%                                                      | 0%           | 0%                                                                   | 0%                    | 25%                           | 0%                      | 25%                    | 25%                                               | 0%                                    | 0%                                | 100%      | 0%                                      | 0%                                 | 0%                       | 0%                                                                                               |      |
| 94        | 94 - Food preparation assistants                                                       | 100%                                  | 10%                  | 10%           | 10%                                                 | 10%                                                      | 0%           | 0%                                                                   | 0%                    | 100%                          | 25%                     | 25%                    | 25%                                               | 0%                                    | 0%                                | 100%      | 0%                                      | 100%                               | 0%                       | 0%                                                                                               |      |
| 95        | 95 - Street and related sales and service workers                                      | 100%                                  | 10%                  | 10%           | 10%                                                 | 10%                                                      | 0%           | 0%                                                                   | 0%                    | 0%                            | 0%                      | 25%                    | 25%                                               | 0%                                    | 0%                                | 100%      | 0%                                      | 100%                               | 0%                       | 0%                                                                                               |      |
| 96        | 96 - Refuse workers and other elementary workers                                       | 100%                                  | 10%                  | 10%           | 10%                                                 | 10%                                                      | 0%           | 0%                                                                   | 0%                    | 0%                            | 0%                      | 25%                    | 25%                                               | 0%                                    | 0%                                | 100%      | 0%                                      | 100%                               | 0%                       | 0%                                                                                               |      |

## United Kingdom

## Percent of jobs that were closed during lockdown

| Isc0 | Nace | Occupation description                                                            | A.                                    | B. Mining     | C.            | D.                              | E. Water supply;                           | F.           | G. Wholesale and                           | H.                         | I.                             | J.                                       | K. Financial                       | L. Real                | M.                                                | N.                                    | O. Public                  | P. Education                            | Q. Human                           | R. Arts,                 | S. Other                                                                                         | T. Activities of households |
|------|------|-----------------------------------------------------------------------------------|---------------------------------------|---------------|---------------|---------------------------------|--------------------------------------------|--------------|--------------------------------------------|----------------------------|--------------------------------|------------------------------------------|------------------------------------|------------------------|---------------------------------------------------|---------------------------------------|----------------------------|-----------------------------------------|------------------------------------|--------------------------|--------------------------------------------------------------------------------------------------|-----------------------------|
|      |      |                                                                                   | Agriculture; and forestry and fishing | and quarrying | Manufacturing | Electricity; gas, steam and air | sewerage, waste management and remediation | Construction | retail trade; repair of motor vehicles and | Transportation and storage | Accommodation and food service | Information and communication activities | Insurance and financial activities | Real estate activities | Professional, scientific and technical activities | Administrative and support activities | Administration and defence | Human health and social work activities | Arts, entertainment and recreation | Other service activities | Activities of households as employers; undifferentiated goods- and services-producing activities |                             |
|      |      |                                                                                   | A                                     | B             | C             | D                               | E                                          | F            | G                                          | H                          | I                              | J                                        | K                                  | L                      | M                                                 | N                                     | O                          | P                                       | Q                                  | R                        | S                                                                                                | T                           |
| 11   | 11   | Chief executives, senior officials and legislators                                | 0%                                    | 0%            | 0%            | 0%                              | 0%                                         | 0%           | 0%                                         | 100%                       | 0%                             | 100%                                     | 0%                                 | 0%                     | 0%                                                | 0%                                    | 0%                         | 0%                                      | 0%                                 | 0%                       | 100%                                                                                             | 100%                        |
| 12   | 12   | Administrative and commercial managers                                            | 0%                                    | 0%            | 0%            | 0%                              | 0%                                         | 0%           | 0%                                         | 100%                       | 0%                             | 100%                                     | 0%                                 | 0%                     | 0%                                                | 0%                                    | 0%                         | 0%                                      | 0%                                 | 0%                       | 0%                                                                                               | 100%                        |
| 13   | 13   | Production and specialised services managers                                      | 0%                                    | 0%            | 0%            | 0%                              | 0%                                         | 0%           | 0%                                         | 100%                       | 0%                             | 100%                                     | 0%                                 | 0%                     | 0%                                                | 0%                                    | 0%                         | 0%                                      | 0%                                 | 0%                       | 100%                                                                                             | 100%                        |
| 14   | 14   | Hospitality, retail and other services managers                                   | 0%                                    | 0%            | 0%            | 0%                              | 0%                                         | 0%           | 0%                                         | 100%                       | 0%                             | 100%                                     | 0%                                 | 0%                     | 0%                                                | 0%                                    | 0%                         | 0%                                      | 0%                                 | 0%                       | 100%                                                                                             | 100%                        |
| 21   | 21   | Science and engineering professionals                                             | 0%                                    | 0%            | 0%            | 0%                              | 0%                                         | 0%           | 0%                                         | 100%                       | 0%                             | 100%                                     | 0%                                 | 0%                     | 0%                                                | 0%                                    | 0%                         | 0%                                      | 0%                                 | 0%                       | 100%                                                                                             | 100%                        |
| 22   | 22   | Health professionals                                                              | 0%                                    | 0%            | 0%            | 0%                              | 0%                                         | 0%           | 0%                                         | 0%                         | 0%                             | 0%                                       | 0%                                 | 0%                     | 0%                                                | 0%                                    | 0%                         | 0%                                      | 0%                                 | 0%                       | 0%                                                                                               | 0%                          |
| 23   | 23   | Teaching professionals                                                            | 0%                                    | 0%            | 0%            | 0%                              | 0%                                         | 0%           | 0%                                         | 100%                       | 0%                             | 100%                                     | 0%                                 | 0%                     | 0%                                                | 0%                                    | 0%                         | 0%                                      | 0%                                 | 0%                       | 100%                                                                                             | 0%                          |
| 24   | 24   | Business and administration professionals                                         | 0%                                    | 0%            | 0%            | 0%                              | 0%                                         | 0%           | 0%                                         | 100%                       | 0%                             | 100%                                     | 0%                                 | 0%                     | 0%                                                | 0%                                    | 0%                         | 0%                                      | 0%                                 | 0%                       | 100%                                                                                             | 100%                        |
| 25   | 25   | Information and communications technology professionals                           | 0%                                    | 0%            | 0%            | 0%                              | 0%                                         | 0%           | 0%                                         | 100%                       | 0%                             | 100%                                     | 0%                                 | 0%                     | 0%                                                | 0%                                    | 0%                         | 0%                                      | 0%                                 | 0%                       | 100%                                                                                             | 100%                        |
| 26   | 26   | Legal, social and cultural professionals                                          | 0%                                    | 75%           | 75%           | 75%                             | 75%                                        | 75%          | 75%                                        | 75%                        | 75%                            | 100%                                     | 75%                                | 75%                    | 75%                                               | 75%                                   | 75%                        | 0%                                      | 75%                                | 0%                       | 100%                                                                                             | 100%                        |
| 31   | 31   | Science and engineering associate professionals                                   | 0%                                    | 0%            | 0%            | 0%                              | 0%                                         | 0%           | 0%                                         | 100%                       | 0%                             | 100%                                     | 0%                                 | 0%                     | 0%                                                | 0%                                    | 0%                         | 0%                                      | 0%                                 | 0%                       | 100%                                                                                             | 100%                        |
| 32   | 32   | Health associate professionals                                                    | 0%                                    | 0%            | 0%            | 0%                              | 0%                                         | 0%           | 0%                                         | 0%                         | 0%                             | 0%                                       | 0%                                 | 0%                     | 0%                                                | 0%                                    | 0%                         | 0%                                      | 0%                                 | 0%                       | 0%                                                                                               | 0%                          |
| 33   | 33   | Business and administration associate professionals                               | 0%                                    | 0%            | 0%            | 0%                              | 0%                                         | 0%           | 0%                                         | 100%                       | 0%                             | 100%                                     | 0%                                 | 0%                     | 0%                                                | 0%                                    | 0%                         | 0%                                      | 0%                                 | 0%                       | 100%                                                                                             | 100%                        |
| 34   | 34   | Legal, social, cultural and related associate professionals                       | 0%                                    | 75%           | 75%           | 75%                             | 75%                                        | 75%          | 75%                                        | 75%                        | 75%                            | 100%                                     | 75%                                | 75%                    | 75%                                               | 75%                                   | 75%                        | 0%                                      | 75%                                | 0%                       | 100%                                                                                             | 100%                        |
| 35   | 35   | Information and communications technicians                                        | 0%                                    | 0%            | 0%            | 0%                              | 0%                                         | 0%           | 0%                                         | 100%                       | 0%                             | 100%                                     | 0%                                 | 0%                     | 0%                                                | 0%                                    | 0%                         | 0%                                      | 0%                                 | 0%                       | 100%                                                                                             | 100%                        |
| 41   | 41   | General and keyboard clerks                                                       | 0%                                    | 0%            | 0%            | 0%                              | 0%                                         | 0%           | 0%                                         | 100%                       | 0%                             | 100%                                     | 0%                                 | 0%                     | 0%                                                | 0%                                    | 0%                         | 0%                                      | 0%                                 | 0%                       | 100%                                                                                             | 100%                        |
| 42   | 42   | Customer services clerks                                                          | 0%                                    | 0%            | 0%            | 0%                              | 0%                                         | 0%           | 0%                                         | 100%                       | 0%                             | 100%                                     | 0%                                 | 0%                     | 0%                                                | 0%                                    | 0%                         | 0%                                      | 0%                                 | 0%                       | 100%                                                                                             | 100%                        |
| 43   | 43   | Numerical and material recording clerks                                           | 0%                                    | 0%            | 0%            | 0%                              | 0%                                         | 0%           | 0%                                         | 100%                       | 0%                             | 100%                                     | 0%                                 | 0%                     | 0%                                                | 0%                                    | 0%                         | 0%                                      | 0%                                 | 0%                       | 100%                                                                                             | 100%                        |
| 44   | 44   | Other clerical support workers                                                    | 0%                                    | 0%            | 0%            | 0%                              | 0%                                         | 0%           | 0%                                         | 100%                       | 0%                             | 100%                                     | 0%                                 | 0%                     | 0%                                                | 0%                                    | 0%                         | 0%                                      | 0%                                 | 0%                       | 100%                                                                                             | 100%                        |
| 51   | 51   | Personal service workers                                                          | 0%                                    | 100%          | 100%          | 100%                            | 100%                                       | 100%         | 100%                                       | 100%                       | 100%                           | 100%                                     | 100%                               | 100%                   | 100%                                              | 100%                                  | 0%                         | 100%                                    | 0%                                 | 100%                     | 100%                                                                                             |                             |
| 52   | 52   | Sales workers                                                                     | 0%                                    | 75%           | 75%           | 75%                             | 75%                                        | 75%          | 75%                                        | 75%                        | 75%                            | 0%                                       | 0%                                 | 0%                     | 100%                                              | 100%                                  | 100%                       | 0%                                      | 75%                                | 0%                       | 100%                                                                                             | 100%                        |
| 53   | 53   | Personal care workers                                                             | 0%                                    | 0%            | 0%            | 0%                              | 0%                                         | 0%           | 0%                                         | 0%                         | 0%                             | 100%                                     | 0%                                 | 0%                     | 0%                                                | 0%                                    | 0%                         | 0%                                      | 0%                                 | 0%                       | 100%                                                                                             | 100%                        |
| 54   | 54   | Protective services workers                                                       | 0%                                    | 0%            | 0%            | 0%                              | 0%                                         | 0%           | 0%                                         | 100%                       | 0%                             | 100%                                     | 0%                                 | 0%                     | 0%                                                | 0%                                    | 0%                         | 0%                                      | 0%                                 | 0%                       | 100%                                                                                             | 100%                        |
| 61   | 61   | Market-oriented skilled agricultural workers                                      | 0%                                    | 0%            | 0%            | 0%                              | 0%                                         | 0%           | 0%                                         | 100%                       | 0%                             | 100%                                     | 0%                                 | 0%                     | 0%                                                | 0%                                    | 0%                         | 0%                                      | 0%                                 | 0%                       | 0%                                                                                               | 0%                          |
| 62   | 62   | Market-oriented skilled forestry, fishery and hunting workers                     | 0%                                    | 0%            | 0%            | 0%                              | 0%                                         | 0%           | 0%                                         | 100%                       | 0%                             | 100%                                     | 0%                                 | 0%                     | 0%                                                | 0%                                    | 0%                         | 0%                                      | 0%                                 | 0%                       | 100%                                                                                             | 100%                        |
| 63   | 63   | Subsistence farmers, fishers, hunters and gatherers                               | 0%                                    | 0%            | 0%            | 0%                              | 0%                                         | 0%           | 0%                                         | 0%                         | 0%                             | 0%                                       | 0%                                 | 0%                     | 0%                                                | 0%                                    | 0%                         | 0%                                      | 0%                                 | 0%                       | 0%                                                                                               | 0%                          |
| 71   | 71   | Building and related trades workers, excluding electricians                       | 0%                                    | 0%            | 0%            | 0%                              | 0%                                         | 0%           | 0%                                         | 100%                       | 0%                             | 100%                                     | 0%                                 | 0%                     | 0%                                                | 0%                                    | 0%                         | 0%                                      | 0%                                 | 0%                       | 100%                                                                                             | 100%                        |
| 72   | 72   | Metal, machinery and related trades workers                                       | 0%                                    | 0%            | 0%            | 0%                              | 0%                                         | 0%           | 0%                                         | 100%                       | 0%                             | 100%                                     | 0%                                 | 0%                     | 0%                                                | 0%                                    | 0%                         | 0%                                      | 0%                                 | 0%                       | 100%                                                                                             | 100%                        |
| 73   | 73   | Handicraft and printing workers                                                   | 0%                                    | 0%            | 0%            | 0%                              | 0%                                         | 0%           | 0%                                         | 100%                       | 0%                             | 100%                                     | 0%                                 | 0%                     | 0%                                                | 0%                                    | 0%                         | 0%                                      | 0%                                 | 0%                       | 100%                                                                                             | 100%                        |
| 74   | 74   | Electrical and electronic trades workers                                          | 0%                                    | 0%            | 0%            | 0%                              | 0%                                         | 0%           | 0%                                         | 100%                       | 0%                             | 100%                                     | 0%                                 | 0%                     | 0%                                                | 0%                                    | 0%                         | 0%                                      | 0%                                 | 0%                       | 100%                                                                                             | 100%                        |
| 75   | 75   | Food processing, wood working, garment and other craft and related trades workers | 0%                                    | 0%            | 0%            | 0%                              | 0%                                         | 0%           | 0%                                         | 100%                       | 0%                             | 0%                                       | 0%                                 | 0%                     | 0%                                                | 0%                                    | 0%                         | 100%                                    | 0%                                 | 100%                     | 100%                                                                                             | 100%                        |
| 81   | 81   | Stationary plant and machine operators                                            | 0%                                    | 0%            | 0%            | 0%                              | 0%                                         | 0%           | 0%                                         | 100%                       | 0%                             | 100%                                     | 0%                                 | 0%                     | 0%                                                | 0%                                    | 0%                         | 0%                                      | 0%                                 | 0%                       | 100%                                                                                             | 100%                        |
| 82   | 82   | Assemblers                                                                        | 0%                                    | 0%            | 0%            | 0%                              | 0%                                         | 0%           | 0%                                         | 100%                       | 0%                             | 100%                                     | 0%                                 | 0%                     | 0%                                                | 0%                                    | 0%                         | 0%                                      | 0%                                 | 0%                       | 100%                                                                                             | 100%                        |
| 83   | 83   | Drivers and mobile plant operators                                                | 0%                                    | 0%            | 0%            | 0%                              | 0%                                         | 0%           | 0%                                         | 100%                       | 0%                             | 0%                                       | 0%                                 | 0%                     | 0%                                                | 0%                                    | 0%                         | 0%                                      | 0%                                 | 0%                       | 100%                                                                                             | 100%                        |
| 91   | 91   | Cleaners and helpers                                                              | 0%                                    | 0%            | 0%            | 0%                              | 0%                                         | 0%           | 0%                                         | 100%                       | 0%                             | 100%                                     | 0%                                 | 0%                     | 0%                                                | 0%                                    | 0%                         | 100%                                    | 0%                                 | 100%                     | 100%                                                                                             | 100%                        |
| 92   | 92   | Agricultural, forestry and fishery labourers                                      | 0%                                    | 0%            | 0%            | 0%                              | 0%                                         | 0%           | 0%                                         | 100%                       | 0%                             | 100%                                     | 0%                                 | 0%                     | 0%                                                | 0%                                    | 0%                         | 0%                                      | 0%                                 | 0%                       | 100%                                                                                             | 100%                        |
| 93   | 93   | Labourers in mining, construction, manufacturing and transport                    | 0%                                    | 0%            | 0%            | 0%                              | 0%                                         | 0%           | 0%                                         | 100%                       | 0%                             | 100%                                     | 0%                                 | 0%                     | 0%                                                | 0%                                    | 0%                         | 0%                                      | 0%                                 | 0%                       | 100%                                                                                             | 100%                        |
| 94   | 94   | Food preparation assistants                                                       | 0%                                    | 0%            | 0%            | 0%                              | 0%                                         | 0%           | 0%                                         | 0%                         | 0%                             | 0%                                       | 0%                                 | 0%                     | 0%                                                | 0%                                    | 0%                         | 0%                                      | 0%                                 | 0%                       | 100%                                                                                             | 100%                        |
| 95   | 95   | Street and related sales and service workers                                      | 0%                                    | 0%            | 0%            | 0%                              | 0%                                         | 0%           | 0%                                         | 100%                       | 0%                             | 100%                                     | 0%                                 | 0%                     | 0%                                                | 0%                                    | 0%                         | 0%                                      | 0%                                 | 0%                       | 100%                                                                                             | 100%                        |
| 96   | 96   | Refuse workers and other elementary workers                                       | 0%                                    | 0%            | 0%            | 0%                              | 0%                                         | 0%           | 0%                                         | 100%                       | 0%                             | 100%                                     | 0%                                 | 0%                     | 0%                                                | 0%                                    | 0%                         | 0%                                      | 0%                                 | 0%                       | 100%                                                                                             | 100%                        |



## United Kingdom

## Percent of jobs subject to teleworking during lockdown

| Isco <sup>1</sup> Nace | Occupation description                                                                 | A.                                    | B. Mining     | C.            | D.                              | E. Water supply;                           | F.           | G. Wholesale and                           | H.                         | I.                             | J.                            | K. Financial                       | L. Real                | M.                                     | N.                         | O. Public                   | P. Education | Q. Human                          | R. Arts,                     | S. Other           | T. Activities of households                                             |
|------------------------|----------------------------------------------------------------------------------------|---------------------------------------|---------------|---------------|---------------------------------|--------------------------------------------|--------------|--------------------------------------------|----------------------------|--------------------------------|-------------------------------|------------------------------------|------------------------|----------------------------------------|----------------------------|-----------------------------|--------------|-----------------------------------|------------------------------|--------------------|-------------------------------------------------------------------------|
|                        |                                                                                        | Agriculture; and forestry and fishing | and quarrying | Manufacturing | Electricity; gas, steam and air | sewerage, waste management and remediation | Construction | retail trade; repair of motor vehicles and | Transportation and storage | Accommodation and food service | Information and communication | Insurance and financial activities | Real estate activities | Professional, scientific and technical | Administrative and support | administration and defence; |              | health and social work activities | entertainment and recreation | service activities | as employers; undifferentiated goods- and services-producing activities |
|                        |                                                                                        | A                                     | B             | C             | D                               | E                                          | F            | G                                          | H                          | I                              | J                             | K                                  | L                      | M                                      | N                          | O                           | P            | Q                                 | R                            | S                  | T                                                                       |
| 11                     | 11 - Chief executives, senior officials and legislators                                | 0%                                    | 90%           | 90%           | 90%                             | 90%                                        | 90%          | 100%                                       | 0%                         | 50%                            | 0%                            | 75%                                | 75%                    | 100%                                   | 100%                       | 100%                        | 0%           | 100%                              | 0%                           | 0%                 | 0%                                                                      |
| 12                     | 12 - Administrative and commercial managers                                            | 0%                                    | 90%           | 90%           | 90%                             | 90%                                        | 90%          | 100%                                       | 0%                         | 50%                            | 0%                            | 75%                                | 75%                    | 100%                                   | 100%                       | 100%                        | 0%           | 100%                              | 0%                           | 0%                 | 0%                                                                      |
| 13                     | 13 - Production and specialised services managers                                      | 0%                                    | 90%           | 90%           | 90%                             | 90%                                        | 90%          | 100%                                       | 0%                         | 50%                            | 0%                            | 75%                                | 75%                    | 100%                                   | 100%                       | 100%                        | 0%           | 100%                              | 0%                           | 0%                 | 0%                                                                      |
| 14                     | 14 - Hospitality, retail and other services managers                                   | 0%                                    | 90%           | 90%           | 90%                             | 90%                                        | 90%          | 100%                                       | 0%                         | 50%                            | 0%                            | 75%                                | 75%                    | 100%                                   | 100%                       | 100%                        | 0%           | 100%                              | 0%                           | 0%                 | 0%                                                                      |
| 21                     | 21 - Science and engineering professionals                                             | 0%                                    | 90%           | 90%           | 90%                             | 90%                                        | 90%          | 100%                                       | 0%                         | 50%                            | 0%                            | 75%                                | 75%                    | 100%                                   | 100%                       | 100%                        | 0%           | 100%                              | 0%                           | 0%                 | 0%                                                                      |
| 22                     | 22 - Health professionals                                                              | 0%                                    | 0%            | 0%            | 0%                              | 0%                                         | 0%           | 0%                                         | 0%                         | 0%                             | 0%                            | 0%                                 | 0%                     | 0%                                     | 0%                         | 0%                          | 0%           | 0%                                | 0%                           | 0%                 | 0%                                                                      |
| 23                     | 23 - Teaching professionals                                                            | 0%                                    | 80%           | 80%           | 80%                             | 80%                                        | 80%          | 80%                                        | 0%                         | 80%                            | 0%                            | 80%                                | 80%                    | 80%                                    | 80%                        | 80%                         | 0%           | 80%                               | 100%                         | 0%                 | 80%                                                                     |
| 24                     | 24 - Business and administration professionals                                         | 0%                                    | 90%           | 90%           | 90%                             | 90%                                        | 90%          | 100%                                       | 0%                         | 50%                            | 0%                            | 75%                                | 75%                    | 100%                                   | 100%                       | 100%                        | 0%           | 100%                              | 0%                           | 0%                 | 0%                                                                      |
| 25                     | 25 - Information and communications technology professionals                           | 0%                                    | 90%           | 90%           | 90%                             | 90%                                        | 90%          | 100%                                       | 0%                         | 100%                           | 0%                            | 75%                                | 75%                    | 100%                                   | 100%                       | 100%                        | 0%           | 100%                              | 0%                           | 0%                 | 0%                                                                      |
| 26                     | 26 - Legal, social and cultural professionals                                          | 0%                                    | 25%           | 25%           | 25%                             | 25%                                        | 25%          | 25%                                        | 25%                        | 25%                            | 0%                            | 25%                                | 25%                    | 25%                                    | 25%                        | 25%                         | 0%           | 25%                               | 100%                         | 0%                 | 0%                                                                      |
| 31                     | 31 - Science and engineering associate professionals                                   | 0%                                    | 90%           | 90%           | 90%                             | 90%                                        | 90%          | 100%                                       | 0%                         | 50%                            | 0%                            | 75%                                | 75%                    | 100%                                   | 100%                       | 100%                        | 0%           | 100%                              | 0%                           | 0%                 | 0%                                                                      |
| 32                     | 32 - Health associate professionals                                                    | 0%                                    | 0%            | 0%            | 0%                              | 0%                                         | 0%           | 0%                                         | 0%                         | 0%                             | 0%                            | 0%                                 | 0%                     | 0%                                     | 0%                         | 0%                          | 0%           | 0%                                | 0%                           | 0%                 | 0%                                                                      |
| 33                     | 33 - Business and administration associate professionals                               | 0%                                    | 90%           | 90%           | 90%                             | 90%                                        | 90%          | 100%                                       | 0%                         | 50%                            | 0%                            | 75%                                | 75%                    | 100%                                   | 100%                       | 100%                        | 0%           | 100%                              | 0%                           | 0%                 | 0%                                                                      |
| 34                     | 34 - Legal, social, cultural and related associate professionals                       | 0%                                    | 25%           | 25%           | 25%                             | 25%                                        | 25%          | 25%                                        | 25%                        | 25%                            | 0%                            | 25%                                | 25%                    | 25%                                    | 25%                        | 25%                         | 0%           | 25%                               | 0%                           | 0%                 | 0%                                                                      |
| 35                     | 35 - Information and communications technicians                                        | 0%                                    | 90%           | 90%           | 90%                             | 90%                                        | 90%          | 100%                                       | 0%                         | 50%                            | 0%                            | 75%                                | 75%                    | 100%                                   | 100%                       | 100%                        | 0%           | 100%                              | 0%                           | 0%                 | 0%                                                                      |
| 41                     | 41 - General and keyboard clerks                                                       | 0%                                    | 90%           | 90%           | 90%                             | 90%                                        | 90%          | 100%                                       | 0%                         | 50%                            | 0%                            | 75%                                | 75%                    | 100%                                   | 100%                       | 100%                        | 0%           | 100%                              | 0%                           | 0%                 | 0%                                                                      |
| 42                     | 42 - Customer services clerks                                                          | 0%                                    | 90%           | 90%           | 90%                             | 90%                                        | 90%          | 100%                                       | 0%                         | 100%                           | 0%                            | 75%                                | 75%                    | 100%                                   | 100%                       | 100%                        | 0%           | 100%                              | 0%                           | 0%                 | 0%                                                                      |
| 43                     | 43 - Numerical and material recording clerks                                           | 0%                                    | 90%           | 90%           | 90%                             | 90%                                        | 90%          | 100%                                       | 0%                         | 50%                            | 0%                            | 75%                                | 75%                    | 100%                                   | 100%                       | 100%                        | 0%           | 100%                              | 0%                           | 0%                 | 0%                                                                      |
| 44                     | 44 - Other clerical support workers                                                    | 0%                                    | 90%           | 90%           | 90%                             | 90%                                        | 90%          | 100%                                       | 0%                         | 100%                           | 0%                            | 75%                                | 75%                    | 100%                                   | 100%                       | 100%                        | 0%           | 100%                              | 0%                           | 0%                 | 0%                                                                      |
| 51                     | 51 - Personal service workers                                                          | 0%                                    | 0%            | 0%            | 0%                              | 0%                                         | 0%           | 0%                                         | 0%                         | 0%                             | 0%                            | 0%                                 | 0%                     | 0%                                     | 0%                         | 0%                          | 0%           | 0%                                | 100%                         | 0%                 | 0%                                                                      |
| 52                     | 52 - Sales workers                                                                     | 0%                                    | 25%           | 25%           | 25%                             | 25%                                        | 25%          | 25%                                        | 25%                        | 100%                           | 100%                          | 100%                               | 100%                   | 0%                                     | 0%                         | 0%                          | 0%           | 25%                               | 100%                         | 0%                 | 0%                                                                      |
| 53                     | 53 - Personal care workers                                                             | 0%                                    | 90%           | 90%           | 90%                             | 90%                                        | 90%          | 100%                                       | 0%                         | 100%                           | 0%                            | 75%                                | 75%                    | 100%                                   | 100%                       | 100%                        | 0%           | 100%                              | 0%                           | 0%                 | 0%                                                                      |
| 54                     | 54 - Protective services workers                                                       | 0%                                    | 90%           | 90%           | 90%                             | 90%                                        | 90%          | 100%                                       | 0%                         | 100%                           | 0%                            | 75%                                | 75%                    | 100%                                   | 100%                       | 100%                        | 0%           | 100%                              | 0%                           | 0%                 | 0%                                                                      |
| 61                     | 61 - Market-oriented skilled agricultural workers                                      | 0%                                    | 90%           | 90%           | 90%                             | 90%                                        | 90%          | 100%                                       | 0%                         | 100%                           | 0%                            | 75%                                | 75%                    | 0%                                     | 0%                         | 0%                          | 0%           | 100%                              | 100%                         | 0%                 | 0%                                                                      |
| 62                     | 62 - Market-oriented skilled forestry, fishery and hunting workers                     | 0%                                    | 90%           | 90%           | 90%                             | 90%                                        | 90%          | 100%                                       | 0%                         | 100%                           | 0%                            | 75%                                | 75%                    | 100%                                   | 100%                       | 100%                        | 0%           | 100%                              | 100%                         | 0%                 | 0%                                                                      |
| 63                     | 63 - Subsistence farmers, fishers, hunters and gatherers                               | 0%                                    | 0%            | 0%            | 0%                              | 0%                                         | 0%           | 0%                                         | 0%                         | 0%                             | 0%                            | 0%                                 | 0%                     | 0%                                     | 0%                         | 0%                          | 0%           | 0%                                | 0%                           | 0%                 | 0%                                                                      |
| 71                     | 71 - Building and related trades workers, excluding electricians                       | 0%                                    | 90%           | 90%           | 90%                             | 90%                                        | 90%          | 100%                                       | 0%                         | 100%                           | 0%                            | 75%                                | 75%                    | 100%                                   | 100%                       | 100%                        | 0%           | 100%                              | 100%                         | 0%                 | 0%                                                                      |
| 72                     | 72 - Metal, machinery and related trades workers                                       | 0%                                    | 90%           | 90%           | 90%                             | 90%                                        | 90%          | 100%                                       | 0%                         | 100%                           | 0%                            | 75%                                | 75%                    | 100%                                   | 100%                       | 100%                        | 0%           | 100%                              | 100%                         | 0%                 | 0%                                                                      |
| 73                     | 73 - Handicraft and printing workers                                                   | 0%                                    | 90%           | 90%           | 90%                             | 90%                                        | 90%          | 100%                                       | 0%                         | 100%                           | 0%                            | 75%                                | 75%                    | 100%                                   | 100%                       | 100%                        | 0%           | 100%                              | 100%                         | 0%                 | 0%                                                                      |
| 74                     | 74 - Electrical and electronic trades workers                                          | 0%                                    | 90%           | 90%           | 90%                             | 90%                                        | 90%          | 100%                                       | 0%                         | 100%                           | 0%                            | 75%                                | 75%                    | 100%                                   | 100%                       | 100%                        | 0%           | 100%                              | 0%                           | 0%                 | 0%                                                                      |
| 75                     | 75 - Food processing, wood working, garment and other craft and related trades workers | 0%                                    | 90%           | 90%           | 90%                             | 90%                                        | 90%          | 100%                                       | 0%                         | 100%                           | 75%                           | 75%                                | 75%                    | 100%                                   | 100%                       | 100%                        | 0%           | 0%                                | 100%                         | 0%                 | 0%                                                                      |
| 81                     | 81 - Stationary plant and machine operators                                            | 0%                                    | 90%           | 90%           | 90%                             | 90%                                        | 90%          | 100%                                       | 0%                         | 100%                           | 0%                            | 75%                                | 75%                    | 100%                                   | 100%                       | 100%                        | 0%           | 100%                              | 100%                         | 0%                 | 0%                                                                      |
| 82                     | 82 - Assemblers                                                                        | 0%                                    | 90%           | 90%           | 90%                             | 90%                                        | 90%          | 100%                                       | 0%                         | 100%                           | 0%                            | 75%                                | 75%                    | 100%                                   | 100%                       | 100%                        | 0%           | 100%                              | 100%                         | 0%                 | 0%                                                                      |
| 83                     | 83 - Drivers and mobile plant operators                                                | 0%                                    | 90%           | 90%           | 90%                             | 90%                                        | 90%          | 100%                                       | 0%                         | 50%                            | 75%                           | 75%                                | 75%                    | 100%                                   | 100%                       | 100%                        | 0%           | 100%                              | 50%                          | 0%                 | 0%                                                                      |
| 91                     | 91 - Cleaners and helpers                                                              | 0%                                    | 90%           | 90%           | 90%                             | 90%                                        | 90%          | 100%                                       | 0%                         | 100%                           | 0%                            | 75%                                | 75%                    | 100%                                   | 100%                       | 100%                        | 0%           | 0%                                | 0%                           | 0%                 | 0%                                                                      |
| 92                     | 92 - Agricultural, forestry and fishery labourers                                      | 0%                                    | 90%           | 90%           | 90%                             | 90%                                        | 90%          | 100%                                       | 0%                         | 50%                            | 0%                            | 75%                                | 75%                    | 100%                                   | 100%                       | 100%                        | 0%           | 100%                              | 100%                         | 0%                 | 0%                                                                      |
| 93                     | 93 - Labourers in mining, construction, manufacturing and transport                    | 0%                                    | 90%           | 90%           | 90%                             | 90%                                        | 90%          | 100%                                       | 0%                         | 75%                            | 0%                            | 75%                                | 75%                    | 100%                                   | 100%                       | 100%                        | 0%           | 100%                              | 100%                         | 0%                 | 0%                                                                      |
| 94                     | 94 - Food preparation assistants                                                       | 0%                                    | 90%           | 90%           | 90%                             | 90%                                        | 90%          | 100%                                       | 0%                         | 75%                            | 75%                           | 75%                                | 75%                    | 100%                                   | 100%                       | 100%                        | 0%           | 100%                              | 0%                           | 0%                 | 0%                                                                      |
| 95                     | 95 - Street and related sales and service workers                                      | 0%                                    | 90%           | 90%           | 90%                             | 90%                                        | 90%          | 100%                                       | 0%                         | 100%                           | 0%                            | 75%                                | 75%                    | 100%                                   | 100%                       | 100%                        | 0%           | 100%                              | 0%                           | 0%                 | 0%                                                                      |
| 96                     | 96 - Refuse workers and other elementary workers                                       | 0%                                    | 90%           | 90%           | 90%                             | 90%                                        | 90%          | 100%                                       | 0%                         | 100%                           | 0%                            | 75%                                | 75%                    | 100%                                   | 100%                       | 100%                        | 0%           | 100%                              | 0%                           | 0%                 | 0%                                                                      |

Georgia

Georgia has registered the first case of Covid-19 on 28 February 2020. However, the country started implementation of national response measures as early as in January, even before the WHO has declared it as a pandemic. Regulations started with mandatory thermo screening at the airports and suspension of flights from high-affected areas, leading to cancelation of all air travel on March 14-16 and follow up cancelation of public events, schools did not open after winter holidays and employers were urged to switch to home-based working mode, wherever possible.

Georgia declared a state of public emergency on March 21, which included cancelation of public transportation, curfews and lockdown for up to two months. Jobs included under essential list included healthcare, agriculture, critical infrastructure (roads, construction, water and sewage systems), wholesale, storage and transportation, police, defense and rescue services. The hospitality sector continued operation and they served as quarantine zones (on average, 5 000 individuals were quarantined). Jobs that were restricted included street sale, art and entertainment, retail service other than food and pharmacy products (online sales were also restricted for small period of time). All schools, kindergartens and universities were encouraged to switch to teleworking. All conferences, seminars and similar events were similarly encouraged to telework, as were most of the public servant positions and the financial industry (banks, insurance).

On May 22, Georgia started gradual relaxation of strict measures.

Percent of jobs that were essential during lockdown

| Isco.Nace | Occupation description                                                            | A. Agriculture; and forestry and quarrying fishing | B. Mining | C. Manufacturing | D. Electricity; gas, steam and air conditioning | E. Water supply; sewerage, waste management and remediation activities | F. Construction | G. Wholesale and retail trade; repair of motor vehicles and motorcycles | H. Transportation and storage | I. Accommodation and food service activities | J. Information and communication | K. Financial and insurance activities | L. Real estate activities | M. Professional, scientific and technical activities | N. Administrative and support activities | O. Public administration and defence | P. Education | Q. Human health and social work activities | R. Arts, entertainment and recreation | S. Other service activities | T. Activities of households as employers; undifferentiated goods- and services-producing activities of households |
|-----------|-----------------------------------------------------------------------------------|----------------------------------------------------|-----------|------------------|-------------------------------------------------|------------------------------------------------------------------------|-----------------|-------------------------------------------------------------------------|-------------------------------|----------------------------------------------|----------------------------------|---------------------------------------|---------------------------|------------------------------------------------------|------------------------------------------|--------------------------------------|--------------|--------------------------------------------|---------------------------------------|-----------------------------|-------------------------------------------------------------------------------------------------------------------|
| 11        | Chief executives, senior officials and legislators                                | 100%                                               | 10%       | 10%              | 10%                                             | 100%                                                                   | 100%            | 50%                                                                     | 10%                           | 25%                                          | 25%                              | 0%                                    | 0%                        | 0%                                                   | 100%                                     | 0%                                   | 100%         | 0%                                         | 0%                                    | 0%                          |                                                                                                                   |
| 12        | Administrative and commercial managers                                            | 100%                                               | 10%       | 10%              | 10%                                             | 100%                                                                   | 100%            | 50%                                                                     | 50%                           | 10%                                          | 25%                              | 25%                                   | 0%                        | 0%                                                   | 0%                                       | 100%                                 | 0%           | 100%                                       | 0%                                    | 0%                          |                                                                                                                   |
| 13        | Production and specialised services managers                                      | 100%                                               | 10%       | 10%              | 10%                                             | 100%                                                                   | 100%            | 50%                                                                     | 50%                           | 10%                                          | 25%                              | 25%                                   | 0%                        | 0%                                                   | 0%                                       | 100%                                 | 0%           | 100%                                       | 0%                                    | 0%                          |                                                                                                                   |
| 14        | Hospitality, retail and other services managers                                   | 100%                                               | 10%       | 10%              | 10%                                             | 100%                                                                   | 100%            | 50%                                                                     | 50%                           | 10%                                          | 25%                              | 25%                                   | 0%                        | 0%                                                   | 0%                                       | 100%                                 | 0%           | 100%                                       | 0%                                    | 0%                          |                                                                                                                   |
| 21        | Science and engineering professionals                                             | 100%                                               | 10%       | 10%              | 10%                                             | 100%                                                                   | 100%            | 50%                                                                     | 50%                           | 10%                                          | 25%                              | 25%                                   | 0%                        | 0%                                                   | 0%                                       | 100%                                 | 0%           | 100%                                       | 0%                                    | 0%                          |                                                                                                                   |
| 22        | Health professionals                                                              | 100%                                               | 100%      | 100%             | 100%                                            | 100%                                                                   | 100%            | 100%                                                                    | 100%                          | 100%                                         | 100%                             | 100%                                  | 100%                      | 100%                                                 | 100%                                     | 100%                                 | 100%         | 100%                                       | 0%                                    | 100%                        |                                                                                                                   |
| 23        | Teaching professionals                                                            | 10%                                                | 0%        | 10%              | 10%                                             | 10%                                                                    | 100%            | 50%                                                                     | 0%                            | 10%                                          | 25%                              | 25%                                   | 0%                        | 0%                                                   | 0%                                       | 100%                                 | 0%           | 0%                                         | 0%                                    | 0%                          |                                                                                                                   |
| 24        | Business and administration professionals                                         | 100%                                               | 10%       | 10%              | 10%                                             | 100%                                                                   | 100%            | 50%                                                                     | 50%                           | 10%                                          | 25%                              | 25%                                   | 0%                        | 0%                                                   | 0%                                       | 100%                                 | 0%           | 100%                                       | 0%                                    | 0%                          |                                                                                                                   |
| 25        | Information and communications technology professionals                           | 100%                                               | 10%       | 10%              | 10%                                             | 100%                                                                   | 100%            | 50%                                                                     | 0%                            | 10%                                          | 25%                              | 25%                                   | 0%                        | 0%                                                   | 0%                                       | 100%                                 | 0%           | 100%                                       | 0%                                    | 0%                          |                                                                                                                   |
| 26        | Legal, social, cultural and related professionals                                 | 100%                                               | 0%        | 0%               | 0%                                              | 100%                                                                   | 100%            | 50%                                                                     | 0%                            | 10%                                          | 0%                               | 0%                                    | 0%                        | 0%                                                   | 0%                                       | 100%                                 | 0%           | 0%                                         | 0%                                    | 0%                          |                                                                                                                   |
| 31        | Science and engineering associate professionals                                   | 100%                                               | 10%       | 10%              | 10%                                             | 100%                                                                   | 100%            | 50%                                                                     | 50%                           | 10%                                          | 25%                              | 25%                                   | 0%                        | 0%                                                   | 0%                                       | 100%                                 | 0%           | 100%                                       | 0%                                    | 0%                          |                                                                                                                   |
| 32        | Health associate professionals                                                    | 100%                                               | 100%      | 100%             | 100%                                            | 100%                                                                   | 100%            | 100%                                                                    | 100%                          | 100%                                         | 100%                             | 100%                                  | 100%                      | 100%                                                 | 100%                                     | 100%                                 | 100%         | 100%                                       | 100%                                  | 100%                        |                                                                                                                   |
| 33        | Business and administration associate professionals                               | 100%                                               | 10%       | 10%              | 10%                                             | 100%                                                                   | 100%            | 50%                                                                     | 50%                           | 10%                                          | 25%                              | 25%                                   | 0%                        | 0%                                                   | 0%                                       | 100%                                 | 0%           | 100%                                       | 0%                                    | 0%                          |                                                                                                                   |
| 34        | Legal, social, cultural and related associate professionals                       | 100%                                               | 0%        | 0%               | 0%                                              | 100%                                                                   | 100%            | 50%                                                                     | 0%                            | 10%                                          | 0%                               | 0%                                    | 0%                        | 0%                                                   | 0%                                       | 100%                                 | 0%           | 100%                                       | 0%                                    | 0%                          |                                                                                                                   |
| 35        | Information and communications technicians                                        | 100%                                               | 10%       | 10%              | 10%                                             | 100%                                                                   | 100%            | 50%                                                                     | 50%                           | 10%                                          | 25%                              | 25%                                   | 0%                        | 0%                                                   | 0%                                       | 100%                                 | 0%           | 100%                                       | 0%                                    | 0%                          |                                                                                                                   |
| 41        | General and keyboard clerks                                                       | 100%                                               | 10%       | 10%              | 10%                                             | 100%                                                                   | 100%            | 50%                                                                     | 50%                           | 10%                                          | 25%                              | 25%                                   | 0%                        | 0%                                                   | 0%                                       | 100%                                 | 0%           | 100%                                       | 0%                                    | 0%                          |                                                                                                                   |
| 42        | Customer services clerks                                                          | 100%                                               | 10%       | 10%              | 10%                                             | 100%                                                                   | 100%            | 50%                                                                     | 0%                            | 10%                                          | 25%                              | 25%                                   | 0%                        | 0%                                                   | 0%                                       | 100%                                 | 0%           | 100%                                       | 0%                                    | 0%                          |                                                                                                                   |
| 43        | Numerical and material recording clerks                                           | 100%                                               | 10%       | 10%              | 10%                                             | 100%                                                                   | 100%            | 50%                                                                     | 50%                           | 10%                                          | 25%                              | 25%                                   | 0%                        | 0%                                                   | 0%                                       | 100%                                 | 0%           | 100%                                       | 0%                                    | 0%                          |                                                                                                                   |
| 44        | Other clerical support workers                                                    | 100%                                               | 10%       | 10%              | 10%                                             | 100%                                                                   | 100%            | 50%                                                                     | 0%                            | 10%                                          | 25%                              | 25%                                   | 0%                        | 0%                                                   | 0%                                       | 100%                                 | 0%           | 100%                                       | 0%                                    | 0%                          |                                                                                                                   |
| 51        | Personal service workers                                                          | 100%                                               | 0%        | 0%               | 0%                                              | 0%                                                                     | 100%            | 50%                                                                     | 0%                            | 10%                                          | 0%                               | 0%                                    | 0%                        | 0%                                                   | 0%                                       | 100%                                 | 0%           | 0%                                         | 0%                                    | 0%                          |                                                                                                                   |
| 52        | Sales workers                                                                     | 50%                                                | 0%        | 0%               | 0%                                              | 0%                                                                     | 100%            | 50%                                                                     | 0%                            | 10%                                          | 0%                               | 50%                                   | 0%                        | 0%                                                   | 0%                                       | 100%                                 | 0%           | 0%                                         | 0%                                    | 0%                          |                                                                                                                   |
| 53        | Personal care workers                                                             | 100%                                               | 10%       | 10%              | 10%                                             | 10%                                                                    | 100%            | 100%                                                                    | 0%                            | 10%                                          | 25%                              | 25%                                   | 0%                        | 0%                                                   | 0%                                       | 100%                                 | 0%           | 100%                                       | 0%                                    | 0%                          |                                                                                                                   |
| 54        | Protective services workers                                                       | 100%                                               | 10%       | 10%              | 10%                                             | 10%                                                                    | 100%            | 50%                                                                     | 0%                            | 10%                                          | 25%                              | 25%                                   | 0%                        | 0%                                                   | 0%                                       | 100%                                 | 0%           | 100%                                       | 0%                                    | 0%                          |                                                                                                                   |
| 61        | Market-oriented skilled agricultural workers                                      | 100%                                               | 10%       | 10%              | 10%                                             | 10%                                                                    | 100%            | 50%                                                                     | 0%                            | 10%                                          | 25%                              | 25%                                   | 100%                      | 100%                                                 | 100%                                     | 100%                                 | 0%           | 0%                                         | 100%                                  | 100%                        |                                                                                                                   |
| 62        | Market-oriented skilled forestry, fishery and hunting workers                     | 100%                                               | 10%       | 10%              | 10%                                             | 10%                                                                    | 100%            | 50%                                                                     | 0%                            | 10%                                          | 25%                              | 25%                                   | 0%                        | 0%                                                   | 0%                                       | 100%                                 | 0%           | 0%                                         | 0%                                    | 0%                          |                                                                                                                   |
| 63        | Subsistence farmers, fishers, hunters and gatherers                               | 100%                                               | 100%      | 100%             | 100%                                            | 100%                                                                   | 100%            | 100%                                                                    | 100%                          | 100%                                         | 100%                             | 100%                                  | 100%                      | 100%                                                 | 100%                                     | 100%                                 | 100%         | 100%                                       | 100%                                  | 100%                        |                                                                                                                   |
| 71        | Building and related trades workers, excluding electricians                       | 100%                                               | 10%       | 10%              | 10%                                             | 10%                                                                    | 100%            | 50%                                                                     | 0%                            | 10%                                          | 25%                              | 25%                                   | 0%                        | 0%                                                   | 0%                                       | 100%                                 | 0%           | 0%                                         | 0%                                    | 0%                          |                                                                                                                   |
| 72        | Metal, machinery and related trades workers                                       | 100%                                               | 10%       | 10%              | 10%                                             | 10%                                                                    | 100%            | 50%                                                                     | 0%                            | 10%                                          | 25%                              | 25%                                   | 0%                        | 0%                                                   | 0%                                       | 100%                                 | 0%           | 0%                                         | 0%                                    | 0%                          |                                                                                                                   |
| 73        | Handicraft and printing workers                                                   | 100%                                               | 10%       | 10%              | 10%                                             | 10%                                                                    | 100%            | 50%                                                                     | 0%                            | 10%                                          | 25%                              | 25%                                   | 0%                        | 0%                                                   | 0%                                       | 100%                                 | 0%           | 0%                                         | 0%                                    | 0%                          |                                                                                                                   |
| 74        | Electrical and electronic trades workers                                          | 100%                                               | 10%       | 10%              | 10%                                             | 10%                                                                    | 100%            | 50%                                                                     | 0%                            | 10%                                          | 25%                              | 25%                                   | 0%                        | 0%                                                   | 0%                                       | 100%                                 | 0%           | 100%                                       | 0%                                    | 0%                          |                                                                                                                   |
| 75        | Food processing, wood working, garment and other craft and related trades workers | 100%                                               | 10%       | 10%              | 10%                                             | 10%                                                                    | 100%            | 50%                                                                     | 0%                            | 10%                                          | 25%                              | 25%                                   | 0%                        | 0%                                                   | 0%                                       | 100%                                 | 0%           | 0%                                         | 0%                                    | 0%                          |                                                                                                                   |
| 81        | Stationary plant and machine operators                                            | 100%                                               | 10%       | 10%              | 10%                                             | 10%                                                                    | 100%            | 50%                                                                     | 0%                            | 10%                                          | 25%                              | 25%                                   | 0%                        | 0%                                                   | 0%                                       | 100%                                 | 0%           | 0%                                         | 0%                                    | 0%                          |                                                                                                                   |
| 82        | Assemblers                                                                        | 100%                                               | 10%       | 10%              | 10%                                             | 10%                                                                    | 100%            | 50%                                                                     | 0%                            | 10%                                          | 25%                              | 25%                                   | 0%                        | 0%                                                   | 0%                                       | 100%                                 | 0%           | 0%                                         | 0%                                    | 0%                          |                                                                                                                   |
| 83        | Drivers and mobile plant operators                                                | 90%                                                | 10%       | 10%              | 10%                                             | 10%                                                                    | 100%            | 50%                                                                     | 50%                           | 25%                                          | 25%                              | 25%                                   | 0%                        | 0%                                                   | 0%                                       | 100%                                 | 0%           | 50%                                        | 0%                                    | 0%                          |                                                                                                                   |
| 91        | Cleaners and helpers                                                              | 90%                                                | 10%       | 10%              | 10%                                             | 10%                                                                    | 100%            | 50%                                                                     | 0%                            | 10%                                          | 25%                              | 25%                                   | 0%                        | 0%                                                   | 0%                                       | 100%                                 | 0%           | 100%                                       | 0%                                    | 0%                          |                                                                                                                   |
| 92        | Agricultural, forestry and fishery labourers                                      | 90%                                                | 10%       | 10%              | 10%                                             | 10%                                                                    | 100%            | 50%                                                                     | 50%                           | 10%                                          | 25%                              | 25%                                   | 0%                        | 0%                                                   | 0%                                       | 100%                                 | 0%           | 0%                                         | 0%                                    | 0%                          |                                                                                                                   |
| 93        | Labourers in mining, construction, manufacturing and transport                    | 100%                                               | 10%       | 10%              | 10%                                             | 10%                                                                    | 100%            | 50%                                                                     | 25%                           | 10%                                          | 25%                              | 25%                                   | 0%                        | 0%                                                   | 0%                                       | 100%                                 | 0%           | 0%                                         | 0%                                    | 0%                          |                                                                                                                   |
| 94        | Food preparation assistants                                                       | 100%                                               | 10%       | 10%              | 10%                                             | 10%                                                                    | 100%            | 25%                                                                     | 25%                           | 25%                                          | 25%                              | 25%                                   | 0%                        | 0%                                                   | 0%                                       | 100%                                 | 0%           | 100%                                       | 0%                                    | 0%                          |                                                                                                                   |
| 95        | Street and related sales and service workers                                      | 0%                                                 | 0%        | 0%               | 0%                                              | 0%                                                                     | 0%              | 0%                                                                      | 0%                            | 0%                                           | 0%                               | 0%                                    | 0%                        | 0%                                                   | 0%                                       | 0%                                   | 0%           | 0%                                         | 0%                                    | 0%                          |                                                                                                                   |
| 96        | Refuse workers and other elementary workers                                       | 100%                                               | 10%       | 10%              | 10%                                             | 10%                                                                    | 100%            | 50%                                                                     | 0%                            | 0%                                           | 25%                              | 25%                                   | 0%                        | 0%                                                   | 0%                                       | 100%                                 | 0%           | 100%                                       | 0%                                    | 0%                          |                                                                                                                   |

Georgia

Percent of jobs that were closed during lockdown

| Isc0 | Nace | Occupation description                                                            | 0                                        |                         |                  |                                                        |                                                                        |                 |                                                                         |                          |                                              |                                  |                                       |                           |                                                      |                                          |                                                                  |              |                                            | 1                                     |                             |                                                                                                                   |
|------|------|-----------------------------------------------------------------------------------|------------------------------------------|-------------------------|------------------|--------------------------------------------------------|------------------------------------------------------------------------|-----------------|-------------------------------------------------------------------------|--------------------------|----------------------------------------------|----------------------------------|---------------------------------------|---------------------------|------------------------------------------------------|------------------------------------------|------------------------------------------------------------------|--------------|--------------------------------------------|---------------------------------------|-----------------------------|-------------------------------------------------------------------------------------------------------------------|
|      |      |                                                                                   | A. Agriculture; and forestry and fishing | B. Mining and quarrying | C. Manufacturing | D. Electricity, gas, steam and air conditioning supply | E. Water supply; sewerage, waste management and remediation activities | F. Construction | G. Wholesale and retail trade; repair of motor vehicles and motorcycles | H. Transport and storage | I. Accommodation and food service activities | J. Information and communication | K. Financial and insurance activities | L. Real estate activities | M. Professional, scientific and technical activities | N. Administrative and support activities | O. Public administration and defence; compulsory social security | P. Education | Q. Human health and social work activities | R. Arts, entertainment and recreation | S. Other service activities | T. Activities of households as employers; undifferentiated goods- and services-producing activities of households |
| 11   | 11   | Chief executives, senior officials and legislators                                | 0%                                       | 0%                      | 0%               | 0%                                                     | 0%                                                                     | 0%              | 50%                                                                     | 0%                       | 90%                                          | 0%                               | 0%                                    | 0%                        | 0%                                                   | 0%                                       | 0%                                                               | 0%           | 0%                                         | 100%                                  | 100%                        | 100%                                                                                                              |
| 12   | 12   | Administrative and commercial managers                                            | 0%                                       | 0%                      | 0%               | 0%                                                     | 0%                                                                     | 0%              | 50%                                                                     | 0%                       | 90%                                          | 0%                               | 0%                                    | 0%                        | 0%                                                   | 0%                                       | 0%                                                               | 0%           | 0%                                         | 100%                                  | 100%                        | 100%                                                                                                              |
| 13   | 13   | Production and specialised services managers                                      | 0%                                       | 0%                      | 0%               | 0%                                                     | 0%                                                                     | 0%              | 50%                                                                     | 0%                       | 90%                                          | 0%                               | 0%                                    | 0%                        | 0%                                                   | 0%                                       | 0%                                                               | 0%           | 0%                                         | 100%                                  | 100%                        | 100%                                                                                                              |
| 14   | 14   | Hospitality, retail and other services managers                                   | 0%                                       | 0%                      | 0%               | 0%                                                     | 0%                                                                     | 0%              | 50%                                                                     | 0%                       | 90%                                          | 0%                               | 0%                                    | 0%                        | 0%                                                   | 0%                                       | 0%                                                               | 0%           | 0%                                         | 100%                                  | 100%                        | 100%                                                                                                              |
| 21   | 21   | Science and engineering professionals                                             | 0%                                       | 0%                      | 0%               | 0%                                                     | 0%                                                                     | 0%              | 50%                                                                     | 0%                       | 90%                                          | 0%                               | 0%                                    | 0%                        | 0%                                                   | 0%                                       | 0%                                                               | 0%           | 0%                                         | 100%                                  | 100%                        | 100%                                                                                                              |
| 22   | 22   | Health professionals                                                              | 0%                                       | 0%                      | 0%               | 0%                                                     | 0%                                                                     | 0%              | 0%                                                                      | 0%                       | 0%                                           | 0%                               | 0%                                    | 0%                        | 0%                                                   | 0%                                       | 0%                                                               | 0%           | 0%                                         | 0%                                    | 0%                          | 0%                                                                                                                |
| 23   | 23   | Teaching professionals                                                            | 0%                                       | 0%                      | 0%               | 0%                                                     | 0%                                                                     | 0%              | 50%                                                                     | 0%                       | 90%                                          | 0%                               | 0%                                    | 0%                        | 0%                                                   | 0%                                       | 0%                                                               | 0%           | 0%                                         | 100%                                  | 100%                        | 100%                                                                                                              |
| 24   | 24   | Business and administration professionals                                         | 0%                                       | 0%                      | 0%               | 0%                                                     | 0%                                                                     | 0%              | 50%                                                                     | 0%                       | 90%                                          | 0%                               | 0%                                    | 0%                        | 0%                                                   | 0%                                       | 0%                                                               | 0%           | 0%                                         | 100%                                  | 100%                        | 100%                                                                                                              |
| 25   | 25   | Information and communications technology professionals                           | 0%                                       | 0%                      | 0%               | 0%                                                     | 0%                                                                     | 0%              | 50%                                                                     | 0%                       | 90%                                          | 0%                               | 0%                                    | 0%                        | 0%                                                   | 0%                                       | 0%                                                               | 0%           | 0%                                         | 100%                                  | 100%                        | 100%                                                                                                              |
| 26   | 26   | Legal, social and cultural professionals                                          | 0%                                       | 75%                     | 75%              | 75%                                                    | 0%                                                                     | 0%              | 50%                                                                     | 75%                      | 90%                                          | 75%                              | 75%                                   | 75%                       | 75%                                                  | 75%                                      | 0%                                                               | 75%          | 0%                                         | 100%                                  | 100%                        | 100%                                                                                                              |
| 31   | 31   | Science and engineering associate professionals                                   | 0%                                       | 0%                      | 0%               | 0%                                                     | 0%                                                                     | 0%              | 50%                                                                     | 0%                       | 90%                                          | 0%                               | 0%                                    | 0%                        | 0%                                                   | 0%                                       | 0%                                                               | 0%           | 0%                                         | 100%                                  | 100%                        | 100%                                                                                                              |
| 32   | 32   | Health associate professionals                                                    | 0%                                       | 0%                      | 0%               | 0%                                                     | 0%                                                                     | 0%              | 0%                                                                      | 0%                       | 0%                                           | 0%                               | 0%                                    | 0%                        | 0%                                                   | 0%                                       | 0%                                                               | 0%           | 0%                                         | 0%                                    | 0%                          | 0%                                                                                                                |
| 33   | 33   | Business and administration associate professionals                               | 0%                                       | 0%                      | 0%               | 0%                                                     | 0%                                                                     | 0%              | 50%                                                                     | 0%                       | 90%                                          | 0%                               | 0%                                    | 0%                        | 0%                                                   | 0%                                       | 0%                                                               | 0%           | 0%                                         | 100%                                  | 100%                        | 100%                                                                                                              |
| 34   | 34   | Legal, social, cultural and related associate professionals                       | 0%                                       | 75%                     | 75%              | 75%                                                    | 0%                                                                     | 0%              | 50%                                                                     | 75%                      | 90%                                          | 75%                              | 75%                                   | 75%                       | 75%                                                  | 0%                                       | 75%                                                              | 0%           | 100%                                       | 100%                                  | 100%                        | 100%                                                                                                              |
| 35   | 35   | Information and communications technicians                                        | 0%                                       | 0%                      | 0%               | 0%                                                     | 0%                                                                     | 0%              | 50%                                                                     | 0%                       | 90%                                          | 0%                               | 0%                                    | 0%                        | 0%                                                   | 0%                                       | 0%                                                               | 0%           | 0%                                         | 100%                                  | 100%                        | 100%                                                                                                              |
| 41   | 41   | General and keyboard clerks                                                       | 0%                                       | 0%                      | 0%               | 0%                                                     | 0%                                                                     | 0%              | 50%                                                                     | 0%                       | 90%                                          | 0%                               | 0%                                    | 0%                        | 0%                                                   | 0%                                       | 0%                                                               | 0%           | 0%                                         | 100%                                  | 100%                        | 100%                                                                                                              |
| 42   | 42   | Customer services clerks                                                          | 0%                                       | 0%                      | 0%               | 0%                                                     | 0%                                                                     | 0%              | 50%                                                                     | 0%                       | 90%                                          | 0%                               | 0%                                    | 0%                        | 0%                                                   | 0%                                       | 0%                                                               | 0%           | 0%                                         | 100%                                  | 100%                        | 100%                                                                                                              |
| 43   | 43   | Numerical and material recording clerks                                           | 0%                                       | 0%                      | 0%               | 0%                                                     | 0%                                                                     | 0%              | 50%                                                                     | 0%                       | 90%                                          | 0%                               | 0%                                    | 0%                        | 0%                                                   | 0%                                       | 0%                                                               | 0%           | 0%                                         | 100%                                  | 100%                        | 100%                                                                                                              |
| 44   | 44   | Other clerical support workers                                                    | 0%                                       | 0%                      | 0%               | 0%                                                     | 0%                                                                     | 0%              | 50%                                                                     | 0%                       | 90%                                          | 0%                               | 0%                                    | 0%                        | 0%                                                   | 0%                                       | 0%                                                               | 0%           | 0%                                         | 100%                                  | 100%                        | 100%                                                                                                              |
| 51   | 51   | Personal service workers                                                          | 0%                                       | 100%                    | 100%             | 100%                                                   | 100%                                                                   | 0%              | 50%                                                                     | 100%                     | 90%                                          | 100%                             | 100%                                  | 100%                      | 100%                                                 | 100%                                     | 0%                                                               | 100%         | 0%                                         | 100%                                  | 100%                        | 100%                                                                                                              |
| 52   | 52   | Sales workers                                                                     | 0%                                       | 75%                     | 75%              | 75%                                                    | 75%                                                                    | 0%              | 50%                                                                     | 75%                      | 90%                                          | 0%                               | 0%                                    | 100%                      | 100%                                                 | 100%                                     | 0%                                                               | 75%          | 0%                                         | 100%                                  | 100%                        | 100%                                                                                                              |
| 53   | 53   | Personal care workers                                                             | 0%                                       | 0%                      | 0%               | 0%                                                     | 0%                                                                     | 0%              | 0%                                                                      | 0%                       | 90%                                          | 0%                               | 0%                                    | 0%                        | 0%                                                   | 0%                                       | 0%                                                               | 0%           | 0%                                         | 100%                                  | 100%                        | 100%                                                                                                              |
| 54   | 54   | Protective services workers                                                       | 0%                                       | 0%                      | 0%               | 0%                                                     | 0%                                                                     | 0%              | 50%                                                                     | 0%                       | 90%                                          | 0%                               | 0%                                    | 0%                        | 0%                                                   | 0%                                       | 0%                                                               | 0%           | 0%                                         | 100%                                  | 100%                        | 100%                                                                                                              |
| 61   | 61   | Market-oriented skilled agricultural workers                                      | 0%                                       | 0%                      | 0%               | 0%                                                     | 0%                                                                     | 0%              | 50%                                                                     | 0%                       | 90%                                          | 0%                               | 0%                                    | 0%                        | 0%                                                   | 0%                                       | 0%                                                               | 0%           | 0%                                         | 0%                                    | 0%                          | 0%                                                                                                                |
| 62   | 62   | Market-oriented skilled forestry, fishery and hunting workers                     | 0%                                       | 0%                      | 0%               | 0%                                                     | 0%                                                                     | 0%              | 50%                                                                     | 0%                       | 90%                                          | 0%                               | 0%                                    | 0%                        | 0%                                                   | 0%                                       | 0%                                                               | 0%           | 0%                                         | 100%                                  | 100%                        | 100%                                                                                                              |
| 63   | 63   | Subsistence farmers, fishers, hunters and gatherers                               | 0%                                       | 0%                      | 0%               | 0%                                                     | 0%                                                                     | 0%              | 0%                                                                      | 0%                       | 0%                                           | 0%                               | 0%                                    | 0%                        | 0%                                                   | 0%                                       | 0%                                                               | 0%           | 0%                                         | 0%                                    | 0%                          | 0%                                                                                                                |
| 71   | 71   | Building and related trades workers, excluding electricians                       | 0%                                       | 0%                      | 0%               | 0%                                                     | 0%                                                                     | 0%              | 50%                                                                     | 0%                       | 90%                                          | 0%                               | 0%                                    | 0%                        | 0%                                                   | 0%                                       | 0%                                                               | 0%           | 0%                                         | 100%                                  | 100%                        | 100%                                                                                                              |
| 72   | 72   | Metal, machinery and related trades workers                                       | 0%                                       | 0%                      | 0%               | 0%                                                     | 0%                                                                     | 0%              | 50%                                                                     | 0%                       | 90%                                          | 0%                               | 0%                                    | 0%                        | 0%                                                   | 0%                                       | 0%                                                               | 0%           | 0%                                         | 100%                                  | 100%                        | 100%                                                                                                              |
| 73   | 73   | Handicraft and printing workers                                                   | 0%                                       | 0%                      | 0%               | 0%                                                     | 0%                                                                     | 0%              | 50%                                                                     | 0%                       | 90%                                          | 0%                               | 0%                                    | 0%                        | 0%                                                   | 0%                                       | 0%                                                               | 0%           | 0%                                         | 100%                                  | 100%                        | 100%                                                                                                              |
| 74   | 74   | Electrical and electronic trades workers                                          | 0%                                       | 0%                      | 0%               | 0%                                                     | 0%                                                                     | 0%              | 50%                                                                     | 0%                       | 90%                                          | 0%                               | 0%                                    | 0%                        | 0%                                                   | 0%                                       | 0%                                                               | 0%           | 0%                                         | 100%                                  | 100%                        | 100%                                                                                                              |
| 75   | 75   | Food processing, wood working, garment and other craft and related trades workers | 0%                                       | 0%                      | 0%               | 0%                                                     | 0%                                                                     | 0%              | 50%                                                                     | 0%                       | 90%                                          | 0%                               | 0%                                    | 0%                        | 0%                                                   | 0%                                       | 0%                                                               | 100%         | 0%                                         | 100%                                  | 100%                        | 100%                                                                                                              |
| 81   | 81   | Stationary plant and machine operators                                            | 0%                                       | 0%                      | 0%               | 0%                                                     | 0%                                                                     | 0%              | 50%                                                                     | 0%                       | 90%                                          | 0%                               | 0%                                    | 0%                        | 0%                                                   | 0%                                       | 0%                                                               | 0%           | 0%                                         | 100%                                  | 100%                        | 100%                                                                                                              |
| 82   | 82   | Assemblers                                                                        | 0%                                       | 0%                      | 0%               | 0%                                                     | 0%                                                                     | 0%              | 50%                                                                     | 0%                       | 90%                                          | 0%                               | 0%                                    | 0%                        | 0%                                                   | 0%                                       | 0%                                                               | 0%           | 0%                                         | 100%                                  | 100%                        | 100%                                                                                                              |
| 83   | 83   | Drivers and mobile plant operators                                                | 0%                                       | 0%                      | 0%               | 0%                                                     | 0%                                                                     | 0%              | 50%                                                                     | 0%                       | 90%                                          | 0%                               | 0%                                    | 0%                        | 0%                                                   | 0%                                       | 0%                                                               | 0%           | 0%                                         | 100%                                  | 100%                        | 100%                                                                                                              |
| 91   | 91   | Cleaners and helpers                                                              | 0%                                       | 0%                      | 0%               | 0%                                                     | 0%                                                                     | 0%              | 50%                                                                     | 0%                       | 90%                                          | 0%                               | 0%                                    | 0%                        | 0%                                                   | 0%                                       | 0%                                                               | 100%         | 0%                                         | 100%                                  | 100%                        | 100%                                                                                                              |
| 92   | 92   | Agricultural, forestry and fishery labourers                                      | 0%                                       | 0%                      | 0%               | 0%                                                     | 0%                                                                     | 0%              | 50%                                                                     | 0%                       | 90%                                          | 0%                               | 0%                                    | 0%                        | 0%                                                   | 0%                                       | 0%                                                               | 0%           | 0%                                         | 100%                                  | 100%                        | 100%                                                                                                              |
| 93   | 93   | Labourers in mining, construction, manufacturing and transport                    | 0%                                       | 0%                      | 0%               | 0%                                                     | 0%                                                                     | 0%              | 50%                                                                     | 0%                       | 90%                                          | 0%                               | 0%                                    | 0%                        | 0%                                                   | 0%                                       | 0%                                                               | 0%           | 0%                                         | 100%                                  | 100%                        | 100%                                                                                                              |
| 94   | 94   | Food preparation assistants                                                       | 0%                                       | 0%                      | 0%               | 0%                                                     | 0%                                                                     | 0%              | 0%                                                                      | 0%                       | 0%                                           | 0%                               | 0%                                    | 0%                        | 0%                                                   | 0%                                       | 0%                                                               | 0%           | 0%                                         | 100%                                  | 100%                        | 100%                                                                                                              |
| 95   | 95   | Street and related sales and service workers                                      | 100%                                     | 100%                    | 100%             | 100%                                                   | 100%                                                                   | 100%            | 100%                                                                    | 100%                     | 100%                                         | 100%                             | 100%                                  | 100%                      | 100%                                                 | 100%                                     | 100%                                                             | 100%         | 100%                                       | 100%                                  | 100%                        | 100%                                                                                                              |
| 96   | 96   | Refuse workers and other elementary workers                                       | 0%                                       | 0%                      | 0%               | 0%                                                     | 0%                                                                     | 0%              | 0%                                                                      | 0%                       | 100%                                         | 0%                               | 0%                                    | 0%                        | 0%                                                   | 0%                                       | 0%                                                               | 0%           | 0%                                         | 100%                                  | 100%                        | 100%                                                                                                              |

## Georgia

## Percent of jobs subject to teleworking during lockdown

| Isc0 | Nace | Occupation description                                                            | 0                                        |           |                  |                                    |                                                             |                 |                                                             |                               |                                   |                                  |                                       |                           |                                 |                               |                                       |              |                                            |                                       |                             |                                                                                                     | 1 |  |
|------|------|-----------------------------------------------------------------------------------|------------------------------------------|-----------|------------------|------------------------------------|-------------------------------------------------------------|-----------------|-------------------------------------------------------------|-------------------------------|-----------------------------------|----------------------------------|---------------------------------------|---------------------------|---------------------------------|-------------------------------|---------------------------------------|--------------|--------------------------------------------|---------------------------------------|-----------------------------|-----------------------------------------------------------------------------------------------------|---|--|
|      |      |                                                                                   | A. Agriculture; and forestry and fishing | B. Mining | C. Manufacturing | D. Electricity; gas, steam and air | E. Water supply; sewerage, waste management and remediation | F. Construction | G. Wholesale and retail trade; repair of motor vehicles and | H. Transportation and storage | I. Accommodation and food service | J. Information and communication | K. Financial and insurance activities | L. Real estate activities | M. Professional, scientific and | N. Administrative and support | O. Public administration and defence; | P. Education | Q. Human health and social work activities | R. Arts, entertainment and recreation | S. Other service activities | T. Activities of households as employers; undifferentiated goods- and services-producing activities |   |  |
|      |      |                                                                                   | A                                        | B         | C                | D                                  | E                                                           | F               | G                                                           | H                             | I                                 | J                                | K                                     | L                         | M                               | N                             | O                                     | P            | Q                                          | R                                     | S                           | T                                                                                                   |   |  |
| 11   | 11   | Chief executives, senior officials and legislators                                | 0%                                       | 90%       | 90%              | 90%                                | 0%                                                          | 0%              | 0%                                                          | 0%                            | 50%                               | 0%                               | 75%                                   | 75%                       | 100%                            | 100%                          | 100%                                  | 0%           | 100%                                       | 0%                                    | 0%                          | 0%                                                                                                  |   |  |
| 12   | 12   | Administrative and commercial managers                                            | 0%                                       | 90%       | 90%              | 90%                                | 0%                                                          | 0%              | 0%                                                          | 0%                            | 50%                               | 0%                               | 75%                                   | 75%                       | 100%                            | 100%                          | 100%                                  | 0%           | 100%                                       | 0%                                    | 0%                          | 0%                                                                                                  |   |  |
| 13   | 13   | Production and specialised services managers                                      | 0%                                       | 90%       | 90%              | 90%                                | 0%                                                          | 0%              | 0%                                                          | 0%                            | 50%                               | 0%                               | 75%                                   | 75%                       | 100%                            | 100%                          | 100%                                  | 0%           | 100%                                       | 0%                                    | 0%                          | 0%                                                                                                  |   |  |
| 14   | 14   | Hospitality, retail and other services managers                                   | 0%                                       | 90%       | 90%              | 90%                                | 0%                                                          | 0%              | 0%                                                          | 0%                            | 50%                               | 0%                               | 75%                                   | 75%                       | 100%                            | 100%                          | 100%                                  | 0%           | 100%                                       | 0%                                    | 0%                          | 0%                                                                                                  |   |  |
| 21   | 21   | Science and engineering professionals                                             | 0%                                       | 90%       | 90%              | 90%                                | 0%                                                          | 0%              | 0%                                                          | 0%                            | 50%                               | 0%                               | 75%                                   | 75%                       | 100%                            | 100%                          | 100%                                  | 0%           | 100%                                       | 0%                                    | 0%                          | 0%                                                                                                  |   |  |
| 22   | 22   | Health professionals                                                              | 0%                                       | 0%        | 0%               | 0%                                 | 0%                                                          | 0%              | 0%                                                          | 0%                            | 0%                                | 0%                               | 0%                                    | 0%                        | 0%                              | 0%                            | 0%                                    | 0%           | 0%                                         | 0%                                    | 100%                        | 0%                                                                                                  |   |  |
| 23   | 23   | Teaching professionals                                                            | 90%                                      | 100%      | 90%              | 90%                                | 90%                                                         | 0%              | 0%                                                          | 0%                            | 100%                              | 0%                               | 75%                                   | 75%                       | 100%                            | 100%                          | 100%                                  | 0%           | 100%                                       | 100%                                  | 0%                          | 0%                                                                                                  |   |  |
| 24   | 24   | Business and administration professionals                                         | 0%                                       | 90%       | 90%              | 90%                                | 0%                                                          | 0%              | 0%                                                          | 0%                            | 50%                               | 0%                               | 75%                                   | 75%                       | 100%                            | 100%                          | 100%                                  | 0%           | 100%                                       | 0%                                    | 0%                          | 0%                                                                                                  |   |  |
| 25   | 25   | Information and communications technology professionals                           | 0%                                       | 90%       | 90%              | 90%                                | 0%                                                          | 0%              | 0%                                                          | 0%                            | 100%                              | 0%                               | 75%                                   | 75%                       | 100%                            | 100%                          | 100%                                  | 0%           | 100%                                       | 0%                                    | 0%                          | 0%                                                                                                  |   |  |
| 26   | 26   | Legal, social and cultural professionals                                          | 0%                                       | 25%       | 25%              | 25%                                | 0%                                                          | 0%              | 0%                                                          | 25%                           | 0%                                | 25%                              | 0%                                    | 25%                       | 25%                             | 25%                           | 25%                                   | 0%           | 25%                                        | 100%                                  | 0%                          | 0%                                                                                                  |   |  |
| 31   | 31   | Science and engineering associate professionals                                   | 0%                                       | 90%       | 90%              | 90%                                | 0%                                                          | 0%              | 0%                                                          | 0%                            | 50%                               | 0%                               | 75%                                   | 75%                       | 100%                            | 100%                          | 100%                                  | 0%           | 100%                                       | 0%                                    | 0%                          | 0%                                                                                                  |   |  |
| 32   | 32   | Health associate professionals                                                    | 0%                                       | 0%        | 0%               | 0%                                 | 0%                                                          | 0%              | 0%                                                          | 0%                            | 0%                                | 0%                               | 0%                                    | 0%                        | 0%                              | 0%                            | 0%                                    | 0%           | 0%                                         | 0%                                    | 0%                          | 0%                                                                                                  |   |  |
| 33   | 33   | Business and administration associate professionals                               | 0%                                       | 90%       | 90%              | 90%                                | 0%                                                          | 0%              | 0%                                                          | 0%                            | 50%                               | 0%                               | 75%                                   | 75%                       | 100%                            | 100%                          | 100%                                  | 0%           | 100%                                       | 0%                                    | 0%                          | 0%                                                                                                  |   |  |
| 34   | 34   | Legal, social, cultural and related associate professionals                       | 0%                                       | 25%       | 25%              | 25%                                | 0%                                                          | 0%              | 0%                                                          | 25%                           | 0%                                | 25%                              | 0%                                    | 25%                       | 25%                             | 25%                           | 25%                                   | 0%           | 25%                                        | 0%                                    | 0%                          | 0%                                                                                                  |   |  |
| 35   | 35   | Information and communications technicians                                        | 0%                                       | 90%       | 90%              | 90%                                | 0%                                                          | 0%              | 0%                                                          | 0%                            | 50%                               | 0%                               | 75%                                   | 75%                       | 100%                            | 100%                          | 100%                                  | 0%           | 100%                                       | 0%                                    | 0%                          | 0%                                                                                                  |   |  |
| 41   | 41   | General and keyboard clerks                                                       | 0%                                       | 90%       | 90%              | 90%                                | 0%                                                          | 0%              | 0%                                                          | 0%                            | 50%                               | 0%                               | 75%                                   | 75%                       | 100%                            | 100%                          | 100%                                  | 0%           | 100%                                       | 0%                                    | 0%                          | 0%                                                                                                  |   |  |
| 42   | 42   | Customer services clerks                                                          | 0%                                       | 90%       | 90%              | 90%                                | 0%                                                          | 0%              | 0%                                                          | 0%                            | 100%                              | 0%                               | 75%                                   | 75%                       | 100%                            | 100%                          | 100%                                  | 0%           | 100%                                       | 0%                                    | 0%                          | 0%                                                                                                  |   |  |
| 43   | 43   | Numerical and material recording clerks                                           | 0%                                       | 90%       | 90%              | 90%                                | 0%                                                          | 0%              | 0%                                                          | 0%                            | 50%                               | 0%                               | 75%                                   | 75%                       | 100%                            | 100%                          | 100%                                  | 0%           | 100%                                       | 0%                                    | 0%                          | 0%                                                                                                  |   |  |
| 44   | 44   | Other clerical support workers                                                    | 0%                                       | 90%       | 90%              | 90%                                | 90%                                                         | 0%              | 0%                                                          | 0%                            | 100%                              | 0%                               | 75%                                   | 75%                       | 100%                            | 100%                          | 100%                                  | 0%           | 100%                                       | 0%                                    | 0%                          | 0%                                                                                                  |   |  |
| 51   | 51   | Personal service workers                                                          | 0%                                       | 0%        | 0%               | 0%                                 | 0%                                                          | 0%              | 0%                                                          | 0%                            | 0%                                | 0%                               | 0%                                    | 0%                        | 0%                              | 0%                            | 0%                                    | 0%           | 0%                                         | 100%                                  | 0%                          | 0%                                                                                                  |   |  |
| 52   | 52   | Sales workers                                                                     | 50%                                      | 25%       | 25%              | 25%                                | 25%                                                         | 0%              | 0%                                                          | 25%                           | 0%                                | 100%                             | 50%                                   | 0%                        | 0%                              | 0%                            | 0%                                    | 0%           | 25%                                        | 100%                                  | 0%                          | 0%                                                                                                  |   |  |
| 53   | 53   | Personal care workers                                                             | 0%                                       | 90%       | 90%              | 90%                                | 90%                                                         | 0%              | 0%                                                          | 0%                            | 100%                              | 0%                               | 75%                                   | 75%                       | 100%                            | 100%                          | 100%                                  | 0%           | 100%                                       | 0%                                    | 0%                          | 0%                                                                                                  |   |  |
| 54   | 54   | Protective services workers                                                       | 0%                                       | 90%       | 90%              | 90%                                | 90%                                                         | 0%              | 0%                                                          | 0%                            | 100%                              | 0%                               | 75%                                   | 75%                       | 100%                            | 100%                          | 100%                                  | 0%           | 100%                                       | 0%                                    | 0%                          | 0%                                                                                                  |   |  |
| 61   | 61   | Market-oriented skilled agricultural workers                                      | 0%                                       | 90%       | 90%              | 90%                                | 90%                                                         | 0%              | 0%                                                          | 0%                            | 100%                              | 0%                               | 75%                                   | 75%                       | 0%                              | 0%                            | 0%                                    | 0%           | 100%                                       | 100%                                  | 0%                          | 0%                                                                                                  |   |  |
| 62   | 62   | Market-oriented skilled forestry, fishery and hunting workers                     | 0%                                       | 90%       | 90%              | 90%                                | 90%                                                         | 0%              | 0%                                                          | 0%                            | 100%                              | 0%                               | 75%                                   | 75%                       | 100%                            | 100%                          | 100%                                  | 0%           | 100%                                       | 100%                                  | 0%                          | 0%                                                                                                  |   |  |
| 63   | 63   | Subsistence farmers, fishers, hunters and gatherers                               | 0%                                       | 0%        | 0%               | 0%                                 | 0%                                                          | 0%              | 0%                                                          | 0%                            | 0%                                | 0%                               | 0%                                    | 0%                        | 0%                              | 0%                            | 0%                                    | 0%           | 0%                                         | 0%                                    | 0%                          | 0%                                                                                                  |   |  |
| 71   | 71   | Building and related trades workers, excluding electricians                       | 0%                                       | 90%       | 90%              | 90%                                | 90%                                                         | 0%              | 0%                                                          | 0%                            | 100%                              | 0%                               | 75%                                   | 75%                       | 100%                            | 100%                          | 100%                                  | 0%           | 100%                                       | 100%                                  | 0%                          | 0%                                                                                                  |   |  |
| 72   | 72   | Metal, machinery and related trades workers                                       | 0%                                       | 90%       | 90%              | 90%                                | 90%                                                         | 0%              | 0%                                                          | 0%                            | 100%                              | 0%                               | 75%                                   | 75%                       | 100%                            | 100%                          | 100%                                  | 0%           | 100%                                       | 100%                                  | 0%                          | 0%                                                                                                  |   |  |
| 73   | 73   | Handicraft and printing workers                                                   | 0%                                       | 90%       | 90%              | 90%                                | 90%                                                         | 0%              | 0%                                                          | 0%                            | 100%                              | 0%                               | 75%                                   | 75%                       | 100%                            | 100%                          | 100%                                  | 0%           | 100%                                       | 100%                                  | 0%                          | 0%                                                                                                  |   |  |
| 74   | 74   | Electrical and electronic trades workers                                          | 0%                                       | 90%       | 90%              | 90%                                | 90%                                                         | 0%              | 0%                                                          | 0%                            | 100%                              | 0%                               | 75%                                   | 75%                       | 100%                            | 100%                          | 100%                                  | 0%           | 100%                                       | 0%                                    | 0%                          | 0%                                                                                                  |   |  |
| 75   | 75   | Food processing, wood working, garment and other craft and related trades workers | 0%                                       | 90%       | 90%              | 90%                                | 90%                                                         | 0%              | 0%                                                          | 0%                            | 100%                              | 75%                              | 75%                                   | 75%                       | 100%                            | 100%                          | 100%                                  | 0%           | 0%                                         | 100%                                  | 0%                          | 0%                                                                                                  |   |  |
| 81   | 81   | Stationary plant and machine operators                                            | 0%                                       | 90%       | 90%              | 90%                                | 90%                                                         | 0%              | 0%                                                          | 0%                            | 100%                              | 0%                               | 75%                                   | 75%                       | 100%                            | 100%                          | 100%                                  | 0%           | 100%                                       | 100%                                  | 0%                          | 0%                                                                                                  |   |  |
| 82   | 82   | Assemblers                                                                        | 0%                                       | 90%       | 90%              | 90%                                | 90%                                                         | 0%              | 0%                                                          | 0%                            | 100%                              | 0%                               | 75%                                   | 75%                       | 100%                            | 100%                          | 100%                                  | 0%           | 100%                                       | 100%                                  | 0%                          | 0%                                                                                                  |   |  |
| 83   | 83   | Drivers and mobile plant operators                                                | 10%                                      | 90%       | 90%              | 90%                                | 90%                                                         | 0%              | 0%                                                          | 0%                            | 50%                               | 75%                              | 75%                                   | 75%                       | 100%                            | 100%                          | 100%                                  | 0%           | 100%                                       | 50%                                   | 0%                          | 0%                                                                                                  |   |  |
| 91   | 91   | Cleaners and helpers                                                              | 10%                                      | 90%       | 90%              | 90%                                | 90%                                                         | 0%              | 0%                                                          | 0%                            | 100%                              | 0%                               | 75%                                   | 75%                       | 100%                            | 100%                          | 100%                                  | 0%           | 0%                                         | 0%                                    | 0%                          | 0%                                                                                                  |   |  |
| 92   | 92   | Agricultural, forestry and fishery labourers                                      | 10%                                      | 90%       | 90%              | 90%                                | 90%                                                         | 0%              | 0%                                                          | 0%                            | 50%                               | 0%                               | 75%                                   | 75%                       | 100%                            | 100%                          | 100%                                  | 0%           | 100%                                       | 100%                                  | 0%                          | 0%                                                                                                  |   |  |
| 93   | 93   | Labourers in mining, construction, manufacturing and transport                    | 0%                                       | 90%       | 90%              | 90%                                | 90%                                                         | 0%              | 0%                                                          | 0%                            | 75%                               | 0%                               | 75%                                   | 75%                       | 100%                            | 100%                          | 100%                                  | 0%           | 100%                                       | 100%                                  | 0%                          | 0%                                                                                                  |   |  |
| 94   | 94   | Food preparation assistants                                                       | 0%                                       | 90%       | 90%              | 90%                                | 90%                                                         | 0%              | 0%                                                          | 0%                            | 75%                               | 75%                              | 75%                                   | 75%                       | 100%                            | 100%                          | 100%                                  | 0%           | 100%                                       | 0%                                    | 0%                          | 0%                                                                                                  |   |  |
| 95   | 95   | Street and related sales and service workers                                      | 0%                                       | 0%        | 0%               | 0%                                 | 0%                                                          | 0%              | 0%                                                          | 0%                            | 0%                                | 0%                               | 0%                                    | 0%                        | 0%                              | 0%                            | 0%                                    | 0%           | 0%                                         | 0%                                    | 0%                          | 0%                                                                                                  |   |  |
| 96   | 96   | Refuse workers and other elementary workers                                       | 0%                                       | 90%       | 90%              | 90%                                | 90%                                                         | 0%              | 0%                                                          | 0%                            | 50%                               | 100%                             | 0%                                    | 75%                       | 75%                             | 100%                          | 100%                                  | 100%         | 0%                                         | 100%                                  | 0%                          | 0%                                                                                                  |   |  |

South Africa

The first COVID case was confirmed in South Africa on 5th March 2020. A nationwide lockdown was put in place from midnight March 26, with only critical workers and transport services, the banking sector, essential food and medicine production, and retail, operating. On May 1, 2020, a phased lifting of the lockdown began, allowing a few sectors to resume operation and others only partially. On May 13, a further relaxation of the lockdown was announced effective June 1. Most economic activities reopened under strict health and social distancing practices except for high-risk ones (i.e., restaurants, bars, taverns, accommodation, domestic air travel, conferences, events, entertainment, sporting activities, and personal services). Remote work is still encouraged where possible.

In May 2020, South Africa introduced a Covid-19 Temporary Employer-Employee Relief Scheme (TERS) for employers who were struggling to pay salaries due to loss of business during the lockdown. The COVID-19 TERS was aimed at preventing job losses and mass retrenchment of workers. The country further introduced a Special COVID-19 social relief of distress (SRD) grant which paid ZAR 350 (USD 20) for unemployed citizens and residents. Despite these measures, unemployment rates and poverty in South Africa still increased. A National Income Dynamics Study Coronavirus Rapid Mobile Survey conducted in June reported that more than 3 million people had lost their jobs and one of a breadwinners did not earn any income in April. Most of the job losses were among the most vulnerable low-income and grant receiving households. The South African economy was, however, already before the COVID-19 pandemic and the lockdowns only compounded the unemployment problem. Although all lockdown restrictions finally lifted on 20 September, the South African government expects a slow recovery of the economy, predicting an 8.2% contraction which will keep unemployment and poverty rates high.

Percent of jobs that were essential during lockdown

| Isco.Nace | Occupation description                                                                 | A                                     | B                    | C             | D                                                   | E                                                                   | F            | G                                                                    | H                     | I                             | J                                  | K                      | L                                                 | M                                     | N                                 | O         | P                                       | Q                            | R                        | S                                                                                                              | T    |
|-----------|----------------------------------------------------------------------------------------|---------------------------------------|----------------------|---------------|-----------------------------------------------------|---------------------------------------------------------------------|--------------|----------------------------------------------------------------------|-----------------------|-------------------------------|------------------------------------|------------------------|---------------------------------------------------|---------------------------------------|-----------------------------------|-----------|-----------------------------------------|------------------------------|--------------------------|----------------------------------------------------------------------------------------------------------------|------|
|           |                                                                                        | Agriculture; and forestry and fishing | Mining and quarrying | Manufacturing | Electricity; gas, steam and air conditioning supply | Water supply; sewerage, waste management and remediation activities | Construction | Wholesale and retail trade; repair of motor vehicles and motorcycles | Transport and storage | Information and communication | Financial and insurance activities | Real estate activities | Professional, scientific and technical activities | Administrative and support activities | Public administration and defence | Education | Human health and social work activities | Arts, recreation and culture | Other service activities | Activities of households as employers; undifferentiated goods- and services-producing activities of households |      |
| 11        | 11 - Chief executives, senior officials and legislators                                | 100%                                  | 50%                  | 10%           | 10%                                                 | 10%                                                                 | 10%          | 0%                                                                   | 0%                    | 50%                           | 0%                                 | 25%                    | 25%                                               | 0%                                    | 0%                                | 0%        | 100%                                    | 0%                           | 100%                     | 0%                                                                                                             | 0%   |
| 12        | 12 - Administrative and commercial managers                                            | 100%                                  | 50%                  | 10%           | 10%                                                 | 10%                                                                 | 10%          | 0%                                                                   | 0%                    | 50%                           | 0%                                 | 25%                    | 25%                                               | 0%                                    | 0%                                | 0%        | 100%                                    | 0%                           | 100%                     | 0%                                                                                                             | 0%   |
| 13        | 13 - Production and specialised services managers                                      | 100%                                  | 50%                  | 10%           | 10%                                                 | 10%                                                                 | 10%          | 0%                                                                   | 0%                    | 50%                           | 0%                                 | 25%                    | 25%                                               | 0%                                    | 0%                                | 0%        | 100%                                    | 0%                           | 100%                     | 0%                                                                                                             | 0%   |
| 14        | 14 - Hospitality, retail and other services managers                                   | 100%                                  | 50%                  | 10%           | 10%                                                 | 10%                                                                 | 10%          | 0%                                                                   | 0%                    | 50%                           | 0%                                 | 25%                    | 25%                                               | 0%                                    | 0%                                | 0%        | 100%                                    | 0%                           | 100%                     | 0%                                                                                                             | 0%   |
| 21        | 21 - Science and engineering professionals                                             | 100%                                  | 50%                  | 10%           | 10%                                                 | 10%                                                                 | 10%          | 0%                                                                   | 0%                    | 50%                           | 0%                                 | 25%                    | 25%                                               | 0%                                    | 0%                                | 0%        | 100%                                    | 0%                           | 100%                     | 0%                                                                                                             | 0%   |
| 22        | 22 - Health professionals                                                              | 100%                                  | 100%                 | 100%          | 100%                                                | 100%                                                                | 100%         | 100%                                                                 | 100%                  | 100%                          | 100%                               | 100%                   | 100%                                              | 100%                                  | 100%                              | 100%      | 100%                                    | 100%                         | 100%                     | 100%                                                                                                           | 100% |
| 23        | 23 - Teaching professionals                                                            | 100%                                  | 50%                  | 10%           | 10%                                                 | 10%                                                                 | 10%          | 0%                                                                   | 0%                    | 0%                            | 0%                                 | 25%                    | 25%                                               | 0%                                    | 0%                                | 0%        | 100%                                    | 0%                           | 0%                       | 100%                                                                                                           | 0%   |
| 24        | 24 - Business and administration professionals                                         | 100%                                  | 50%                  | 10%           | 10%                                                 | 10%                                                                 | 10%          | 0%                                                                   | 0%                    | 50%                           | 0%                                 | 25%                    | 25%                                               | 0%                                    | 0%                                | 0%        | 100%                                    | 0%                           | 100%                     | 0%                                                                                                             | 0%   |
| 25        | 25 - Information and communications technology professionals                           | 100%                                  | 50%                  | 10%           | 10%                                                 | 10%                                                                 | 10%          | 0%                                                                   | 0%                    | 0%                            | 0%                                 | 25%                    | 25%                                               | 0%                                    | 0%                                | 0%        | 100%                                    | 0%                           | 100%                     | 0%                                                                                                             | 0%   |
| 26        | 26 - Legal, social and cultural professionals                                          | 100%                                  | 50%                  | 0%            | 0%                                                  | 0%                                                                  | 0%           | 0%                                                                   | 0%                    | 0%                            | 0%                                 | 0%                     | 0%                                                | 0%                                    | 0%                                | 0%        | 100%                                    | 0%                           | 0%                       | 0%                                                                                                             | 0%   |
| 31        | 31 - Science and engineering associate professionals                                   | 100%                                  | 50%                  | 10%           | 10%                                                 | 10%                                                                 | 10%          | 0%                                                                   | 0%                    | 50%                           | 0%                                 | 25%                    | 25%                                               | 0%                                    | 0%                                | 0%        | 100%                                    | 0%                           | 100%                     | 0%                                                                                                             | 0%   |
| 32        | 32 - Health associate professionals                                                    | 100%                                  | 100%                 | 100%          | 100%                                                | 100%                                                                | 100%         | 100%                                                                 | 100%                  | 100%                          | 100%                               | 100%                   | 100%                                              | 100%                                  | 100%                              | 100%      | 100%                                    | 100%                         | 100%                     | 100%                                                                                                           | 100% |
| 33        | 33 - Business and administration associate professionals                               | 100%                                  | 50%                  | 10%           | 10%                                                 | 10%                                                                 | 10%          | 0%                                                                   | 0%                    | 50%                           | 0%                                 | 25%                    | 25%                                               | 0%                                    | 0%                                | 0%        | 100%                                    | 0%                           | 100%                     | 0%                                                                                                             | 0%   |
| 34        | 34 - Legal, social, cultural and related associate professionals                       | 100%                                  | 50%                  | 0%            | 0%                                                  | 0%                                                                  | 0%           | 0%                                                                   | 0%                    | 0%                            | 0%                                 | 0%                     | 0%                                                | 0%                                    | 0%                                | 0%        | 100%                                    | 0%                           | 100%                     | 0%                                                                                                             | 0%   |
| 35        | 35 - Information and communications technicians                                        | 100%                                  | 50%                  | 10%           | 10%                                                 | 10%                                                                 | 10%          | 0%                                                                   | 0%                    | 50%                           | 0%                                 | 25%                    | 25%                                               | 0%                                    | 0%                                | 0%        | 100%                                    | 0%                           | 100%                     | 0%                                                                                                             | 0%   |
| 41        | 41 - General and keyboard clerks                                                       | 100%                                  | 50%                  | 10%           | 10%                                                 | 10%                                                                 | 10%          | 0%                                                                   | 0%                    | 50%                           | 0%                                 | 25%                    | 25%                                               | 0%                                    | 0%                                | 0%        | 100%                                    | 0%                           | 100%                     | 0%                                                                                                             | 0%   |
| 42        | 42 - Customer services clerks                                                          | 100%                                  | 50%                  | 10%           | 10%                                                 | 10%                                                                 | 10%          | 0%                                                                   | 0%                    | 0%                            | 0%                                 | 25%                    | 25%                                               | 0%                                    | 0%                                | 0%        | 100%                                    | 0%                           | 100%                     | 0%                                                                                                             | 0%   |
| 43        | 43 - Numerical and material recording clerks                                           | 100%                                  | 50%                  | 10%           | 10%                                                 | 10%                                                                 | 10%          | 0%                                                                   | 0%                    | 50%                           | 0%                                 | 25%                    | 25%                                               | 0%                                    | 0%                                | 0%        | 100%                                    | 0%                           | 100%                     | 0%                                                                                                             | 0%   |
| 44        | 44 - Other clerical support workers                                                    | 100%                                  | 50%                  | 10%           | 10%                                                 | 10%                                                                 | 10%          | 0%                                                                   | 0%                    | 0%                            | 0%                                 | 25%                    | 25%                                               | 0%                                    | 0%                                | 0%        | 100%                                    | 0%                           | 100%                     | 0%                                                                                                             | 0%   |
| 51        | 51 - Personal service workers                                                          | 100%                                  | 50%                  | 0%            | 0%                                                  | 0%                                                                  | 0%           | 0%                                                                   | 0%                    | 0%                            | 0%                                 | 0%                     | 0%                                                | 0%                                    | 0%                                | 0%        | 100%                                    | 0%                           | 0%                       | 0%                                                                                                             | 0%   |
| 52        | 52 - Sales workers                                                                     | 100%                                  | 50%                  | 0%            | 0%                                                  | 0%                                                                  | 0%           | 0%                                                                   | 0%                    | 0%                            | 0%                                 | 0%                     | 0%                                                | 0%                                    | 0%                                | 0%        | 100%                                    | 0%                           | 0%                       | 0%                                                                                                             | 0%   |
| 53        | 53 - Personal care workers                                                             | 100%                                  | 50%                  | 10%           | 10%                                                 | 10%                                                                 | 10%          | 0%                                                                   | 100%                  | 0%                            | 0%                                 | 25%                    | 25%                                               | 0%                                    | 0%                                | 0%        | 100%                                    | 0%                           | 100%                     | 0%                                                                                                             | 0%   |
| 54        | 54 - Protective services workers                                                       | 100%                                  | 50%                  | 10%           | 10%                                                 | 10%                                                                 | 10%          | 0%                                                                   | 0%                    | 0%                            | 0%                                 | 25%                    | 25%                                               | 0%                                    | 0%                                | 0%        | 100%                                    | 0%                           | 100%                     | 0%                                                                                                             | 0%   |
| 61        | 61 - Market-oriented skilled agricultural workers                                      | 100%                                  | 50%                  | 10%           | 10%                                                 | 10%                                                                 | 10%          | 0%                                                                   | 0%                    | 0%                            | 0%                                 | 25%                    | 25%                                               | 100%                                  | 100%                              | 100%      | 100%                                    | 0%                           | 0%                       | 100%                                                                                                           | 100% |
| 62        | 62 - Market-oriented skilled forestry, fishery and hunting workers                     | 100%                                  | 50%                  | 10%           | 10%                                                 | 10%                                                                 | 10%          | 0%                                                                   | 0%                    | 0%                            | 0%                                 | 25%                    | 25%                                               | 0%                                    | 0%                                | 0%        | 100%                                    | 0%                           | 0%                       | 0%                                                                                                             | 0%   |
| 63        | 63 - Subsistence farmers, fishers, hunters and gatherers                               | 100%                                  | 100%                 | 100%          | 100%                                                | 100%                                                                | 100%         | 100%                                                                 | 100%                  | 100%                          | 100%                               | 100%                   | 100%                                              | 100%                                  | 100%                              | 100%      | 100%                                    | 100%                         | 100%                     | 100%                                                                                                           | 100% |
| 71        | 71 - Building and related trades workers, excluding electricians                       | 100%                                  | 50%                  | 10%           | 10%                                                 | 10%                                                                 | 10%          | 0%                                                                   | 0%                    | 0%                            | 0%                                 | 25%                    | 25%                                               | 0%                                    | 0%                                | 0%        | 100%                                    | 0%                           | 0%                       | 0%                                                                                                             | 0%   |
| 72        | 72 - Metal, machinery and related trades workers                                       | 100%                                  | 50%                  | 10%           | 10%                                                 | 10%                                                                 | 10%          | 0%                                                                   | 0%                    | 0%                            | 0%                                 | 25%                    | 25%                                               | 0%                                    | 0%                                | 0%        | 100%                                    | 0%                           | 0%                       | 0%                                                                                                             | 0%   |
| 73        | 73 - Handicraft and printing workers                                                   | 100%                                  | 50%                  | 10%           | 10%                                                 | 10%                                                                 | 10%          | 0%                                                                   | 0%                    | 0%                            | 0%                                 | 25%                    | 25%                                               | 0%                                    | 0%                                | 0%        | 100%                                    | 0%                           | 0%                       | 0%                                                                                                             | 0%   |
| 74        | 74 - Electrical and electronic trades workers                                          | 100%                                  | 50%                  | 10%           | 10%                                                 | 10%                                                                 | 10%          | 0%                                                                   | 0%                    | 0%                            | 0%                                 | 25%                    | 25%                                               | 0%                                    | 0%                                | 0%        | 100%                                    | 0%                           | 100%                     | 0%                                                                                                             | 0%   |
| 75        | 75 - Food processing, wood working, garment and other craft and related trades workers | 100%                                  | 50%                  | 10%           | 10%                                                 | 10%                                                                 | 10%          | 0%                                                                   | 0%                    | 0%                            | 0%                                 | 25%                    | 25%                                               | 0%                                    | 0%                                | 0%        | 100%                                    | 0%                           | 0%                       | 0%                                                                                                             | 0%   |
| 81        | 81 - Stationary plant and machine operators                                            | 100%                                  | 50%                  | 10%           | 10%                                                 | 10%                                                                 | 10%          | 0%                                                                   | 0%                    | 0%                            | 0%                                 | 25%                    | 25%                                               | 0%                                    | 0%                                | 0%        | 100%                                    | 0%                           | 0%                       | 0%                                                                                                             | 0%   |
| 82        | 82 - Assemblers                                                                        | 100%                                  | 50%                  | 10%           | 10%                                                 | 10%                                                                 | 10%          | 0%                                                                   | 0%                    | 0%                            | 0%                                 | 25%                    | 25%                                               | 0%                                    | 0%                                | 0%        | 100%                                    | 0%                           | 0%                       | 0%                                                                                                             | 0%   |
| 83        | 83 - Drivers and mobile plant operators                                                | 100%                                  | 50%                  | 10%           | 10%                                                 | 10%                                                                 | 10%          | 0%                                                                   | 0%                    | 50%                           | 25%                                | 25%                    | 25%                                               | 0%                                    | 0%                                | 0%        | 100%                                    | 0%                           | 50%                      | 0%                                                                                                             | 0%   |
| 91        | 91 - Cleaners and helpers                                                              | 100%                                  | 50%                  | 10%           | 10%                                                 | 10%                                                                 | 10%          | 0%                                                                   | 0%                    | 0%                            | 0%                                 | 25%                    | 25%                                               | 0%                                    | 0%                                | 0%        | 100%                                    | 0%                           | 100%                     | 0%                                                                                                             | 0%   |
| 92        | 92 - Agricultural, forestry and fishery labourers                                      | 100%                                  | 50%                  | 10%           | 10%                                                 | 10%                                                                 | 10%          | 0%                                                                   | 0%                    | 50%                           | 0%                                 | 25%                    | 25%                                               | 0%                                    | 0%                                | 0%        | 100%                                    | 0%                           | 0%                       | 0%                                                                                                             | 0%   |
| 93        | 93 - Labourers in mining, construction, manufacturing and transport                    | 100%                                  | 50%                  | 10%           | 10%                                                 | 10%                                                                 | 10%          | 0%                                                                   | 0%                    | 25%                           | 0%                                 | 25%                    | 25%                                               | 0%                                    | 0%                                | 0%        | 100%                                    | 0%                           | 0%                       | 0%                                                                                                             | 0%   |
| 94        | 94 - Food preparation assistants                                                       | 100%                                  | 50%                  | 10%           | 10%                                                 | 10%                                                                 | 10%          | 0%                                                                   | 100%                  | 25%                           | 25%                                | 25%                    | 25%                                               | 0%                                    | 0%                                | 0%        | 100%                                    | 0%                           | 100%                     | 0%                                                                                                             | 0%   |
| 95        | 95 - Street and related sales and service workers                                      | 100%                                  | 50%                  | 10%           | 10%                                                 | 10%                                                                 | 10%          | 0%                                                                   | 0%                    | 0%                            | 0%                                 | 25%                    | 25%                                               | 0%                                    | 0%                                | 0%        | 100%                                    | 0%                           | 100%                     | 0%                                                                                                             | 0%   |
| 96        | 96 - Refuse workers and other elementary workers                                       | 100%                                  | 50%                  | 10%           | 10%                                                 | 10%                                                                 | 10%          | 0%                                                                   | 0%                    | 0%                            | 0%                                 | 25%                    | 25%                                               | 0%                                    | 0%                                | 0%        | 100%                                    | 0%                           | 100%                     | 0%                                                                                                             | 0%   |

## South Africa

## Percent of jobs that were closed during lockdown

| Isc0 | Nace | Occupation description                                                            | A.                                    | B. Mining     | C.            | D.                              | E. Water supply;                           | F.           | G. Wholesale and                           | H.                         | I.                             | J.                                       | K. Financial                       | L. Real                | M.                                                | N.                                    | O. Public                  | P. Education                            | Q. Human                           | R. Arts,                 | S. Other                                                                                         | T. Activities of households |
|------|------|-----------------------------------------------------------------------------------|---------------------------------------|---------------|---------------|---------------------------------|--------------------------------------------|--------------|--------------------------------------------|----------------------------|--------------------------------|------------------------------------------|------------------------------------|------------------------|---------------------------------------------------|---------------------------------------|----------------------------|-----------------------------------------|------------------------------------|--------------------------|--------------------------------------------------------------------------------------------------|-----------------------------|
|      |      |                                                                                   | Agriculture; and forestry and fishing | and quarrying | Manufacturing | Electricity; gas, steam and air | sewerage, waste management and remediation | Construction | retail trade; repair of motor vehicles and | Transportation and storage | Accommodation and food service | Information and communication activities | Insurance and financial activities | Real estate activities | Professional, scientific and technical activities | Administrative and support activities | Administration and defence | Human health and social work activities | Arts, entertainment and recreation | Other service activities | Activities of households as employers; undifferentiated goods- and services-producing activities |                             |
|      |      |                                                                                   | A                                     | B             | C             | D                               | E                                          | F            | G                                          | H                          | I                              | J                                        | K                                  | L                      | M                                                 | N                                     | O                          | P                                       | Q                                  | R                        | S                                                                                                | T                           |
| 11   | 11   | Chief executives, senior officials and legislators                                | 0%                                    | 0%            | 0%            | 0%                              | 0%                                         | 0%           | 0%                                         | 100%                       | 0%                             | 100%                                     | 0%                                 | 0%                     | 0%                                                | 0%                                    | 0%                         | 0%                                      | 0%                                 | 0%                       | 100%                                                                                             | 100%                        |
| 12   | 12   | Administrative and commercial managers                                            | 0%                                    | 0%            | 0%            | 0%                              | 0%                                         | 0%           | 0%                                         | 100%                       | 0%                             | 100%                                     | 0%                                 | 0%                     | 0%                                                | 0%                                    | 0%                         | 0%                                      | 0%                                 | 0%                       | 100%                                                                                             | 100%                        |
| 13   | 13   | Production and specialised services managers                                      | 0%                                    | 0%            | 0%            | 0%                              | 0%                                         | 0%           | 0%                                         | 100%                       | 0%                             | 100%                                     | 0%                                 | 0%                     | 0%                                                | 0%                                    | 0%                         | 0%                                      | 0%                                 | 0%                       | 100%                                                                                             | 100%                        |
| 14   | 14   | Hospitality, retail and other services managers                                   | 0%                                    | 0%            | 0%            | 0%                              | 0%                                         | 0%           | 0%                                         | 100%                       | 0%                             | 100%                                     | 0%                                 | 0%                     | 0%                                                | 0%                                    | 0%                         | 0%                                      | 0%                                 | 0%                       | 100%                                                                                             | 100%                        |
| 21   | 21   | Science and engineering professionals                                             | 0%                                    | 0%            | 0%            | 0%                              | 0%                                         | 0%           | 0%                                         | 100%                       | 0%                             | 100%                                     | 0%                                 | 0%                     | 0%                                                | 0%                                    | 0%                         | 0%                                      | 0%                                 | 0%                       | 100%                                                                                             | 100%                        |
| 22   | 22   | Health professionals                                                              | 0%                                    | 0%            | 0%            | 0%                              | 0%                                         | 0%           | 0%                                         | 0%                         | 0%                             | 0%                                       | 0%                                 | 0%                     | 0%                                                | 0%                                    | 0%                         | 0%                                      | 0%                                 | 0%                       | 0%                                                                                               | 0%                          |
| 23   | 23   | Teaching professionals                                                            | 0%                                    | 0%            | 0%            | 0%                              | 0%                                         | 0%           | 0%                                         | 100%                       | 0%                             | 100%                                     | 0%                                 | 0%                     | 0%                                                | 0%                                    | 0%                         | 0%                                      | 0%                                 | 0%                       | 100%                                                                                             | 100%                        |
| 24   | 24   | Business and administration professionals                                         | 0%                                    | 0%            | 0%            | 0%                              | 0%                                         | 0%           | 0%                                         | 100%                       | 0%                             | 100%                                     | 0%                                 | 0%                     | 0%                                                | 0%                                    | 0%                         | 0%                                      | 0%                                 | 0%                       | 100%                                                                                             | 100%                        |
| 25   | 25   | Information and communications technology professionals                           | 0%                                    | 0%            | 0%            | 0%                              | 0%                                         | 0%           | 0%                                         | 100%                       | 0%                             | 100%                                     | 0%                                 | 0%                     | 0%                                                | 0%                                    | 0%                         | 0%                                      | 0%                                 | 0%                       | 100%                                                                                             | 100%                        |
| 26   | 26   | Legal, social and cultural professionals                                          | 0%                                    | 50%           | 75%           | 75%                             | 75%                                        | 75%          | 75%                                        | 75%                        | 75%                            | 100%                                     | 75%                                | 75%                    | 75%                                               | 75%                                   | 75%                        | 0%                                      | 75%                                | 0%                       | 100%                                                                                             | 100%                        |
| 31   | 31   | Science and engineering associate professionals                                   | 0%                                    | 0%            | 0%            | 0%                              | 0%                                         | 0%           | 0%                                         | 100%                       | 0%                             | 100%                                     | 0%                                 | 0%                     | 0%                                                | 0%                                    | 0%                         | 0%                                      | 0%                                 | 0%                       | 100%                                                                                             | 100%                        |
| 32   | 32   | Health associate professionals                                                    | 0%                                    | 0%            | 0%            | 0%                              | 0%                                         | 0%           | 0%                                         | 0%                         | 0%                             | 0%                                       | 0%                                 | 0%                     | 0%                                                | 0%                                    | 0%                         | 0%                                      | 0%                                 | 0%                       | 0%                                                                                               | 0%                          |
| 33   | 33   | Business and administration associate professionals                               | 0%                                    | 0%            | 0%            | 0%                              | 0%                                         | 0%           | 0%                                         | 100%                       | 0%                             | 100%                                     | 0%                                 | 0%                     | 0%                                                | 0%                                    | 0%                         | 0%                                      | 0%                                 | 0%                       | 100%                                                                                             | 100%                        |
| 34   | 34   | Legal, social, cultural and related associate professionals                       | 0%                                    | 50%           | 75%           | 75%                             | 75%                                        | 75%          | 75%                                        | 75%                        | 75%                            | 100%                                     | 75%                                | 75%                    | 75%                                               | 75%                                   | 75%                        | 0%                                      | 75%                                | 0%                       | 100%                                                                                             | 100%                        |
| 35   | 35   | Information and communications technicians                                        | 0%                                    | 0%            | 0%            | 0%                              | 0%                                         | 0%           | 0%                                         | 100%                       | 0%                             | 100%                                     | 0%                                 | 0%                     | 0%                                                | 0%                                    | 0%                         | 0%                                      | 0%                                 | 0%                       | 100%                                                                                             | 100%                        |
| 41   | 41   | General and keyboard clerks                                                       | 0%                                    | 0%            | 0%            | 0%                              | 0%                                         | 0%           | 0%                                         | 100%                       | 0%                             | 100%                                     | 0%                                 | 0%                     | 0%                                                | 0%                                    | 0%                         | 0%                                      | 0%                                 | 0%                       | 100%                                                                                             | 100%                        |
| 42   | 42   | Customer services clerks                                                          | 0%                                    | 0%            | 0%            | 0%                              | 0%                                         | 0%           | 0%                                         | 100%                       | 0%                             | 100%                                     | 0%                                 | 0%                     | 0%                                                | 0%                                    | 0%                         | 0%                                      | 0%                                 | 0%                       | 100%                                                                                             | 100%                        |
| 43   | 43   | Numerical and material recording clerks                                           | 0%                                    | 0%            | 0%            | 0%                              | 0%                                         | 0%           | 0%                                         | 100%                       | 0%                             | 100%                                     | 0%                                 | 0%                     | 0%                                                | 0%                                    | 0%                         | 0%                                      | 0%                                 | 0%                       | 100%                                                                                             | 100%                        |
| 44   | 44   | Other clerical support workers                                                    | 0%                                    | 0%            | 0%            | 0%                              | 0%                                         | 0%           | 0%                                         | 100%                       | 0%                             | 100%                                     | 0%                                 | 0%                     | 0%                                                | 0%                                    | 0%                         | 0%                                      | 0%                                 | 0%                       | 100%                                                                                             | 100%                        |
| 51   | 51   | Personal service workers                                                          | 0%                                    | 0%            | 100%          | 100%                            | 100%                                       | 100%         | 100%                                       | 100%                       | 100%                           | 100%                                     | 100%                               | 100%                   | 100%                                              | 100%                                  | 100%                       | 0%                                      | 100%                               | 0%                       | 100%                                                                                             | 100%                        |
| 52   | 52   | Sales workers                                                                     | 0%                                    | 0%            | 75%           | 75%                             | 75%                                        | 75%          | 75%                                        | 75%                        | 75%                            | 0%                                       | 0%                                 | 0%                     | 100%                                              | 100%                                  | 100%                       | 0%                                      | 75%                                | 0%                       | 100%                                                                                             | 100%                        |
| 53   | 53   | Personal care workers                                                             | 0%                                    | 0%            | 0%            | 0%                              | 0%                                         | 0%           | 0%                                         | 0%                         | 0%                             | 100%                                     | 0%                                 | 0%                     | 0%                                                | 0%                                    | 0%                         | 0%                                      | 0%                                 | 0%                       | 100%                                                                                             | 100%                        |
| 54   | 54   | Protective services workers                                                       | 0%                                    | 0%            | 0%            | 0%                              | 0%                                         | 0%           | 0%                                         | 100%                       | 0%                             | 100%                                     | 0%                                 | 0%                     | 0%                                                | 0%                                    | 0%                         | 0%                                      | 0%                                 | 0%                       | 100%                                                                                             | 100%                        |
| 61   | 61   | Market-oriented skilled agricultural workers                                      | 0%                                    | 0%            | 0%            | 0%                              | 0%                                         | 0%           | 0%                                         | 100%                       | 0%                             | 100%                                     | 0%                                 | 0%                     | 0%                                                | 0%                                    | 0%                         | 0%                                      | 0%                                 | 0%                       | 0%                                                                                               | 0%                          |
| 62   | 62   | Market-oriented skilled forestry, fishery and hunting workers                     | 0%                                    | 0%            | 0%            | 0%                              | 0%                                         | 0%           | 0%                                         | 100%                       | 0%                             | 100%                                     | 0%                                 | 0%                     | 0%                                                | 0%                                    | 0%                         | 0%                                      | 0%                                 | 0%                       | 100%                                                                                             | 100%                        |
| 63   | 63   | Subsistence farmers, fishers, hunters and gatherers                               | 0%                                    | 0%            | 0%            | 0%                              | 0%                                         | 0%           | 0%                                         | 0%                         | 0%                             | 0%                                       | 0%                                 | 0%                     | 0%                                                | 0%                                    | 0%                         | 0%                                      | 0%                                 | 0%                       | 0%                                                                                               | 0%                          |
| 71   | 71   | Building and related trades workers, excluding electricians                       | 0%                                    | 0%            | 0%            | 0%                              | 0%                                         | 0%           | 0%                                         | 100%                       | 0%                             | 100%                                     | 0%                                 | 0%                     | 0%                                                | 0%                                    | 0%                         | 0%                                      | 0%                                 | 0%                       | 100%                                                                                             | 100%                        |
| 72   | 72   | Metal, machinery and related trades workers                                       | 0%                                    | 0%            | 0%            | 0%                              | 0%                                         | 0%           | 0%                                         | 100%                       | 0%                             | 100%                                     | 0%                                 | 0%                     | 0%                                                | 0%                                    | 0%                         | 0%                                      | 0%                                 | 0%                       | 100%                                                                                             | 100%                        |
| 73   | 73   | Handicraft and printing workers                                                   | 0%                                    | 0%            | 0%            | 0%                              | 0%                                         | 0%           | 0%                                         | 100%                       | 0%                             | 100%                                     | 0%                                 | 0%                     | 0%                                                | 0%                                    | 0%                         | 0%                                      | 0%                                 | 0%                       | 100%                                                                                             | 100%                        |
| 74   | 74   | Electrical and electronic trades workers                                          | 0%                                    | 0%            | 0%            | 0%                              | 0%                                         | 0%           | 0%                                         | 100%                       | 0%                             | 100%                                     | 0%                                 | 0%                     | 0%                                                | 0%                                    | 0%                         | 0%                                      | 0%                                 | 0%                       | 100%                                                                                             | 100%                        |
| 75   | 75   | Food processing, wood working, garment and other craft and related trades workers | 0%                                    | 0%            | 0%            | 0%                              | 0%                                         | 0%           | 0%                                         | 100%                       | 0%                             | 0%                                       | 0%                                 | 0%                     | 0%                                                | 0%                                    | 0%                         | 100%                                    | 0%                                 | 100%                     | 100%                                                                                             | 100%                        |
| 81   | 81   | Stationary plant and machine operators                                            | 0%                                    | 0%            | 0%            | 0%                              | 0%                                         | 0%           | 0%                                         | 100%                       | 0%                             | 100%                                     | 0%                                 | 0%                     | 0%                                                | 0%                                    | 0%                         | 0%                                      | 0%                                 | 0%                       | 100%                                                                                             | 100%                        |
| 82   | 82   | Assemblers                                                                        | 0%                                    | 0%            | 0%            | 0%                              | 0%                                         | 0%           | 0%                                         | 100%                       | 0%                             | 100%                                     | 0%                                 | 0%                     | 0%                                                | 0%                                    | 0%                         | 0%                                      | 0%                                 | 0%                       | 100%                                                                                             | 100%                        |
| 83   | 83   | Drivers and mobile plant operators                                                | 0%                                    | 0%            | 0%            | 0%                              | 0%                                         | 0%           | 0%                                         | 100%                       | 0%                             | 0%                                       | 0%                                 | 0%                     | 0%                                                | 0%                                    | 0%                         | 0%                                      | 0%                                 | 0%                       | 100%                                                                                             | 100%                        |
| 91   | 91   | Cleaners and helpers                                                              | 0%                                    | 0%            | 0%            | 0%                              | 0%                                         | 0%           | 0%                                         | 100%                       | 0%                             | 100%                                     | 0%                                 | 0%                     | 0%                                                | 0%                                    | 0%                         | 100%                                    | 0%                                 | 100%                     | 100%                                                                                             | 100%                        |
| 92   | 92   | Agricultural, forestry and fishery labourers                                      | 0%                                    | 0%            | 0%            | 0%                              | 0%                                         | 0%           | 0%                                         | 100%                       | 0%                             | 100%                                     | 0%                                 | 0%                     | 0%                                                | 0%                                    | 0%                         | 0%                                      | 0%                                 | 0%                       | 100%                                                                                             | 100%                        |
| 93   | 93   | Labourers in mining, construction, manufacturing and transport                    | 0%                                    | 0%            | 0%            | 0%                              | 0%                                         | 0%           | 0%                                         | 100%                       | 0%                             | 100%                                     | 0%                                 | 0%                     | 0%                                                | 0%                                    | 0%                         | 0%                                      | 0%                                 | 0%                       | 100%                                                                                             | 100%                        |
| 94   | 94   | Food preparation assistants                                                       | 0%                                    | 0%            | 0%            | 0%                              | 0%                                         | 0%           | 0%                                         | 0%                         | 0%                             | 0%                                       | 0%                                 | 0%                     | 0%                                                | 0%                                    | 0%                         | 0%                                      | 0%                                 | 0%                       | 100%                                                                                             | 100%                        |
| 95   | 95   | Street and related sales and service workers                                      | 0%                                    | 0%            | 0%            | 0%                              | 0%                                         | 0%           | 0%                                         | 100%                       | 0%                             | 100%                                     | 0%                                 | 0%                     | 0%                                                | 0%                                    | 0%                         | 0%                                      | 0%                                 | 0%                       | 100%                                                                                             | 100%                        |
| 96   | 96   | Refuse workers and other elementary workers                                       | 0%                                    | 0%            | 0%            | 0%                              | 0%                                         | 0%           | 0%                                         | 100%                       | 0%                             | 100%                                     | 0%                                 | 0%                     | 0%                                                | 0%                                    | 0%                         | 0%                                      | 0%                                 | 0%                       | 100%                                                                                             | 100%                        |

## South Africa

## Percent of jobs subject to teleworking during lockdown

| Isc0 | Nace | Occupation description                                                            | A.                                    | B. Mining     | C.            | D.                              | E. Water supply;                           | F.           | G. Wholesale and                           | H.                         | I.                             | J.                            | K. Financial                       | L. Real                | M.                                     | N.                         | O. Public                   | P. Education | Q. Human                                | R. Arts,                     | S. Other           | T. Activities of households                                             |
|------|------|-----------------------------------------------------------------------------------|---------------------------------------|---------------|---------------|---------------------------------|--------------------------------------------|--------------|--------------------------------------------|----------------------------|--------------------------------|-------------------------------|------------------------------------|------------------------|----------------------------------------|----------------------------|-----------------------------|--------------|-----------------------------------------|------------------------------|--------------------|-------------------------------------------------------------------------|
|      |      |                                                                                   | Agriculture; and forestry and fishing | and quarrying | Manufacturing | Electricity; gas, steam and air | sewerage, waste management and remediation | Construction | retail trade; repair of motor vehicles and | Transportation and storage | Accommodation and food service | Information and communication | Insurance and financial activities | Real estate activities | Professional, scientific and technical | Administrative and support | administration and defence; |              | Human health and social work activities | entertainment and recreation | service activities | as employers; undifferentiated goods- and services-producing activities |
|      |      |                                                                                   | A                                     | B             | C             | D                               | E                                          | F            | G                                          | H                          | I                              | J                             | K                                  | L                      | M                                      | N                          | O                           | P            | Q                                       | R                            | S                  | T                                                                       |
| 11   | 11   | Chief executives, senior officials and legislators                                | 0%                                    | 50%           | 90%           | 90%                             | 90%                                        | 100%         | 100%                                       | 0%                         | 50%                            | 0%                            | 75%                                | 75%                    | 100%                                   | 100%                       | 100%                        | 0%           | 100%                                    | 0%                           | 0%                 | 0%                                                                      |
| 12   | 12   | Administrative and commercial managers                                            | 0%                                    | 50%           | 90%           | 90%                             | 90%                                        | 100%         | 100%                                       | 0%                         | 50%                            | 0%                            | 75%                                | 75%                    | 100%                                   | 100%                       | 100%                        | 0%           | 100%                                    | 0%                           | 0%                 | 0%                                                                      |
| 13   | 13   | Production and specialised services managers                                      | 0%                                    | 50%           | 90%           | 90%                             | 90%                                        | 100%         | 100%                                       | 0%                         | 50%                            | 0%                            | 75%                                | 75%                    | 100%                                   | 100%                       | 100%                        | 0%           | 100%                                    | 0%                           | 0%                 | 0%                                                                      |
| 14   | 14   | Hospitality, retail and other services managers                                   | 0%                                    | 50%           | 90%           | 90%                             | 90%                                        | 100%         | 100%                                       | 0%                         | 50%                            | 0%                            | 75%                                | 75%                    | 100%                                   | 100%                       | 100%                        | 0%           | 100%                                    | 0%                           | 0%                 | 0%                                                                      |
| 21   | 21   | Science and engineering professionals                                             | 0%                                    | 50%           | 90%           | 90%                             | 90%                                        | 100%         | 100%                                       | 0%                         | 50%                            | 0%                            | 75%                                | 75%                    | 100%                                   | 100%                       | 100%                        | 0%           | 100%                                    | 0%                           | 0%                 | 0%                                                                      |
| 22   | 22   | Health professionals                                                              | 0%                                    | 0%            | 0%            | 0%                              | 0%                                         | 0%           | 0%                                         | 0%                         | 0%                             | 0%                            | 0%                                 | 0%                     | 0%                                     | 0%                         | 0%                          | 0%           | 0%                                      | 0%                           | 0%                 | 0%                                                                      |
| 23   | 23   | Teaching professionals                                                            | 0%                                    | 50%           | 90%           | 90%                             | 90%                                        | 100%         | 100%                                       | 0%                         | 100%                           | 0%                            | 75%                                | 75%                    | 100%                                   | 100%                       | 100%                        | 0%           | 100%                                    | 100%                         | 0%                 | 0%                                                                      |
| 24   | 24   | Business and administration professionals                                         | 0%                                    | 50%           | 90%           | 90%                             | 90%                                        | 100%         | 100%                                       | 0%                         | 50%                            | 0%                            | 75%                                | 75%                    | 100%                                   | 100%                       | 100%                        | 0%           | 100%                                    | 0%                           | 0%                 | 0%                                                                      |
| 25   | 25   | Information and communications technology professionals                           | 0%                                    | 50%           | 90%           | 90%                             | 90%                                        | 100%         | 100%                                       | 0%                         | 100%                           | 0%                            | 75%                                | 75%                    | 100%                                   | 100%                       | 100%                        | 0%           | 100%                                    | 0%                           | 0%                 | 0%                                                                      |
| 26   | 26   | Legal, social and cultural professionals                                          | 0%                                    | 0%            | 25%           | 25%                             | 25%                                        | 25%          | 25%                                        | 25%                        | 25%                            | 0%                            | 25%                                | 25%                    | 25%                                    | 25%                        | 25%                         | 0%           | 25%                                     | 100%                         | 0%                 | 0%                                                                      |
| 31   | 31   | Science and engineering associate professionals                                   | 0%                                    | 50%           | 90%           | 90%                             | 90%                                        | 100%         | 100%                                       | 0%                         | 50%                            | 0%                            | 75%                                | 75%                    | 100%                                   | 100%                       | 100%                        | 0%           | 100%                                    | 0%                           | 0%                 | 0%                                                                      |
| 32   | 32   | Health associate professionals                                                    | 0%                                    | 0%            | 0%            | 0%                              | 0%                                         | 0%           | 0%                                         | 0%                         | 0%                             | 0%                            | 0%                                 | 0%                     | 0%                                     | 0%                         | 0%                          | 0%           | 0%                                      | 0%                           | 0%                 | 0%                                                                      |
| 33   | 33   | Business and administration associate professionals                               | 0%                                    | 50%           | 90%           | 90%                             | 90%                                        | 100%         | 100%                                       | 0%                         | 50%                            | 0%                            | 75%                                | 75%                    | 100%                                   | 100%                       | 100%                        | 0%           | 100%                                    | 0%                           | 0%                 | 0%                                                                      |
| 34   | 34   | Legal, social, cultural and related associate professionals                       | 0%                                    | 0%            | 25%           | 25%                             | 25%                                        | 25%          | 25%                                        | 25%                        | 25%                            | 0%                            | 25%                                | 25%                    | 25%                                    | 25%                        | 25%                         | 0%           | 25%                                     | 0%                           | 0%                 | 0%                                                                      |
| 35   | 35   | Information and communications technicians                                        | 0%                                    | 50%           | 90%           | 90%                             | 90%                                        | 100%         | 100%                                       | 0%                         | 50%                            | 0%                            | 75%                                | 75%                    | 100%                                   | 100%                       | 100%                        | 0%           | 100%                                    | 0%                           | 0%                 | 0%                                                                      |
| 41   | 41   | General and keyboard clerks                                                       | 0%                                    | 50%           | 90%           | 90%                             | 90%                                        | 100%         | 100%                                       | 0%                         | 50%                            | 0%                            | 75%                                | 75%                    | 100%                                   | 100%                       | 100%                        | 0%           | 100%                                    | 0%                           | 0%                 | 0%                                                                      |
| 42   | 42   | Customer services clerks                                                          | 0%                                    | 50%           | 90%           | 90%                             | 90%                                        | 100%         | 100%                                       | 0%                         | 100%                           | 0%                            | 75%                                | 75%                    | 100%                                   | 100%                       | 100%                        | 0%           | 100%                                    | 0%                           | 0%                 | 0%                                                                      |
| 43   | 43   | Numerical and material recording clerks                                           | 0%                                    | 50%           | 90%           | 90%                             | 90%                                        | 100%         | 100%                                       | 0%                         | 50%                            | 0%                            | 75%                                | 75%                    | 100%                                   | 100%                       | 100%                        | 0%           | 100%                                    | 0%                           | 0%                 | 0%                                                                      |
| 44   | 44   | Other clerical support workers                                                    | 0%                                    | 50%           | 90%           | 90%                             | 90%                                        | 100%         | 100%                                       | 0%                         | 100%                           | 0%                            | 75%                                | 75%                    | 100%                                   | 100%                       | 100%                        | 0%           | 100%                                    | 0%                           | 0%                 | 0%                                                                      |
| 51   | 51   | Personal service workers                                                          | 0%                                    | 50%           | 0%            | 0%                              | 0%                                         | 0%           | 0%                                         | 0%                         | 0%                             | 0%                            | 0%                                 | 0%                     | 0%                                     | 0%                         | 0%                          | 0%           | 0%                                      | 100%                         | 0%                 | 0%                                                                      |
| 52   | 52   | Sales workers                                                                     | 0%                                    | 50%           | 25%           | 25%                             | 25%                                        | 25%          | 25%                                        | 25%                        | 25%                            | 100%                          | 100%                               | 100%                   | 0%                                     | 0%                         | 0%                          | 0%           | 25%                                     | 100%                         | 0%                 | 0%                                                                      |
| 53   | 53   | Personal care workers                                                             | 0%                                    | 50%           | 90%           | 90%                             | 90%                                        | 100%         | 100%                                       | 0%                         | 100%                           | 0%                            | 75%                                | 75%                    | 100%                                   | 100%                       | 100%                        | 0%           | 100%                                    | 0%                           | 0%                 | 0%                                                                      |
| 54   | 54   | Protective services workers                                                       | 0%                                    | 50%           | 90%           | 90%                             | 90%                                        | 100%         | 100%                                       | 0%                         | 100%                           | 0%                            | 75%                                | 75%                    | 100%                                   | 100%                       | 100%                        | 0%           | 100%                                    | 0%                           | 0%                 | 0%                                                                      |
| 61   | 61   | Market-oriented skilled agricultural workers                                      | 0%                                    | 50%           | 90%           | 90%                             | 90%                                        | 100%         | 100%                                       | 0%                         | 100%                           | 0%                            | 75%                                | 75%                    | 0%                                     | 0%                         | 0%                          | 0%           | 100%                                    | 100%                         | 0%                 | 0%                                                                      |
| 62   | 62   | Market-oriented skilled forestry, fishery and hunting workers                     | 0%                                    | 50%           | 90%           | 90%                             | 90%                                        | 100%         | 100%                                       | 0%                         | 100%                           | 0%                            | 75%                                | 75%                    | 100%                                   | 100%                       | 100%                        | 0%           | 100%                                    | 100%                         | 0%                 | 0%                                                                      |
| 63   | 63   | Subsistence farmers, fishers, hunters and gatherers                               | 0%                                    | 0%            | 0%            | 0%                              | 0%                                         | 0%           | 0%                                         | 0%                         | 0%                             | 0%                            | 0%                                 | 0%                     | 0%                                     | 0%                         | 0%                          | 0%           | 0%                                      | 0%                           | 0%                 | 0%                                                                      |
| 71   | 71   | Building and related trades workers, excluding electricians                       | 0%                                    | 50%           | 90%           | 90%                             | 90%                                        | 100%         | 100%                                       | 0%                         | 100%                           | 0%                            | 75%                                | 75%                    | 100%                                   | 100%                       | 100%                        | 0%           | 100%                                    | 100%                         | 0%                 | 0%                                                                      |
| 72   | 72   | Metal, machinery and related trades workers                                       | 0%                                    | 50%           | 90%           | 90%                             | 90%                                        | 100%         | 100%                                       | 0%                         | 100%                           | 0%                            | 75%                                | 75%                    | 100%                                   | 100%                       | 100%                        | 0%           | 100%                                    | 100%                         | 0%                 | 0%                                                                      |
| 73   | 73   | Handicraft and printing workers                                                   | 0%                                    | 50%           | 90%           | 90%                             | 90%                                        | 100%         | 100%                                       | 0%                         | 100%                           | 0%                            | 75%                                | 75%                    | 100%                                   | 100%                       | 100%                        | 0%           | 100%                                    | 100%                         | 0%                 | 0%                                                                      |
| 74   | 74   | Electrical and electronic trades workers                                          | 0%                                    | 50%           | 90%           | 90%                             | 90%                                        | 100%         | 100%                                       | 0%                         | 100%                           | 0%                            | 75%                                | 75%                    | 100%                                   | 100%                       | 100%                        | 0%           | 100%                                    | 0%                           | 0%                 | 0%                                                                      |
| 75   | 75   | Food processing, wood working, garment and other craft and related trades workers | 0%                                    | 50%           | 90%           | 90%                             | 90%                                        | 100%         | 100%                                       | 0%                         | 100%                           | 75%                           | 75%                                | 75%                    | 100%                                   | 100%                       | 100%                        | 0%           | 0%                                      | 100%                         | 0%                 | 0%                                                                      |
| 81   | 81   | Stationary plant and machine operators                                            | 0%                                    | 50%           | 90%           | 90%                             | 90%                                        | 100%         | 100%                                       | 0%                         | 100%                           | 0%                            | 75%                                | 75%                    | 100%                                   | 100%                       | 100%                        | 0%           | 100%                                    | 100%                         | 0%                 | 0%                                                                      |
| 82   | 82   | Assemblers                                                                        | 0%                                    | 50%           | 90%           | 90%                             | 90%                                        | 100%         | 100%                                       | 0%                         | 100%                           | 0%                            | 75%                                | 75%                    | 100%                                   | 100%                       | 100%                        | 0%           | 100%                                    | 100%                         | 0%                 | 0%                                                                      |
| 83   | 83   | Drivers and mobile plant operators                                                | 0%                                    | 50%           | 90%           | 90%                             | 90%                                        | 100%         | 100%                                       | 0%                         | 50%                            | 75%                           | 75%                                | 75%                    | 100%                                   | 100%                       | 100%                        | 0%           | 100%                                    | 50%                          | 0%                 | 0%                                                                      |
| 91   | 91   | Cleaners and helpers                                                              | 0%                                    | 50%           | 90%           | 90%                             | 90%                                        | 100%         | 100%                                       | 0%                         | 100%                           | 0%                            | 75%                                | 75%                    | 100%                                   | 100%                       | 100%                        | 0%           | 0%                                      | 0%                           | 0%                 | 0%                                                                      |
| 92   | 92   | Agricultural, forestry and fishery labourers                                      | 0%                                    | 50%           | 90%           | 90%                             | 90%                                        | 100%         | 100%                                       | 0%                         | 50%                            | 0%                            | 75%                                | 75%                    | 100%                                   | 100%                       | 100%                        | 0%           | 100%                                    | 100%                         | 0%                 | 0%                                                                      |
| 93   | 93   | Labourers in mining, construction, manufacturing and transport                    | 0%                                    | 50%           | 90%           | 90%                             | 90%                                        | 100%         | 100%                                       | 0%                         | 75%                            | 0%                            | 75%                                | 75%                    | 100%                                   | 100%                       | 100%                        | 0%           | 100%                                    | 100%                         | 0%                 | 0%                                                                      |
| 94   | 94   | Food preparation assistants                                                       | 0%                                    | 50%           | 90%           | 90%                             | 90%                                        | 100%         | 100%                                       | 0%                         | 75%                            | 75%                           | 75%                                | 75%                    | 100%                                   | 100%                       | 100%                        | 0%           | 100%                                    | 0%                           | 0%                 | 0%                                                                      |
| 95   | 95   | Street and related sales and service workers                                      | 0%                                    | 50%           | 90%           | 90%                             | 90%                                        | 100%         | 100%                                       | 0%                         | 100%                           | 0%                            | 75%                                | 75%                    | 100%                                   | 100%                       | 100%                        | 0%           | 100%                                    | 0%                           | 0%                 | 0%                                                                      |
| 96   | 96   | Refuse workers and other elementary workers                                       | 0%                                    | 50%           | 90%           | 90%                             | 90%                                        | 100%         | 100%                                       | 0%                         | 100%                           | 0%                            | 75%                                | 75%                    | 100%                                   | 100%                       | 100%                        | 0%           | 100%                                    | 0%                           | 0%                 | 0%                                                                      |

## Pakistan

The first two COVID cases were recorded in Pakistan on 26th February 2020. Starting on March 23, both the federal and provincial governments implemented measures to contain and mitigate the spread of the virus. These included selective quarantines, border closures with neighbouring countries, international and domestic travel restrictions, school and university closures, banning of public events, social distancing measures, and varying levels of lockdown across the country.

Since mid-April, the federal government, in coordination with provinces, has gradually eased lockdown arrangements, by allowing 'low-risk industries' to restart operation and 'small retail shops' to reopen with newly developed Standard Operating Procedures (SOPs). In addition, restrictions on domestic and international movements have been lifted (e.g. domestic flights, train services, and international flights have resumed).

## Percent of jobs that were essential during lockdown

| Isco | Nace | Occupation description                                                            | A    | B    | C    | D    | E    | F    | G    | H    | I    | J    | K    | L    | M    | N    | O    | P    | Q    | R    | S    | T    |
|------|------|-----------------------------------------------------------------------------------|------|------|------|------|------|------|------|------|------|------|------|------|------|------|------|------|------|------|------|------|
| 11   | 11   | Chief executives, senior officials and legislators                                | 100% | 10%  | 10%  | 10%  | 10%  | 10%  | 0%   | 0%   | 50%  | 0%   | 25%  | 25%  | 0%   | 0%   | 100% | 0%   | 100% | 0%   | 0%   | 0%   |
| 12   | 12   | Administrative and commercial managers                                            | 100% | 10%  | 10%  | 10%  | 10%  | 10%  | 0%   | 0%   | 50%  | 0%   | 25%  | 25%  | 0%   | 0%   | 100% | 0%   | 100% | 0%   | 0%   | 0%   |
| 13   | 13   | Production and specialised services managers                                      | 100% | 10%  | 10%  | 10%  | 10%  | 10%  | 0%   | 0%   | 50%  | 0%   | 25%  | 25%  | 0%   | 0%   | 100% | 0%   | 100% | 0%   | 0%   | 0%   |
| 14   | 14   | Hospitality, retail and other services managers                                   | 100% | 10%  | 10%  | 10%  | 10%  | 10%  | 0%   | 0%   | 50%  | 0%   | 25%  | 25%  | 0%   | 0%   | 100% | 0%   | 100% | 0%   | 0%   | 0%   |
| 21   | 21   | Science and engineering professionals                                             | 100% | 10%  | 10%  | 10%  | 10%  | 10%  | 0%   | 0%   | 50%  | 0%   | 25%  | 25%  | 0%   | 0%   | 100% | 0%   | 100% | 0%   | 0%   | 0%   |
| 22   | 22   | Health professionals                                                              | 100% | 100% | 100% | 100% | 100% | 100% | 100% | 100% | 100% | 100% | 100% | 100% | 100% | 100% | 100% | 100% | 100% | 100% | 100% | 100% |
| 23   | 23   | Teaching professionals                                                            | 100% | 10%  | 10%  | 10%  | 10%  | 10%  | 0%   | 0%   | 0%   | 0%   | 25%  | 25%  | 0%   | 0%   | 100% | 0%   | 0%   | 0%   | 0%   | 0%   |
| 24   | 24   | Business and administration professionals                                         | 100% | 10%  | 10%  | 10%  | 10%  | 10%  | 0%   | 0%   | 50%  | 0%   | 25%  | 25%  | 0%   | 0%   | 100% | 0%   | 100% | 0%   | 0%   | 0%   |
| 25   | 25   | Information and communications technology professionals                           | 100% | 10%  | 10%  | 10%  | 10%  | 10%  | 0%   | 0%   | 0%   | 0%   | 25%  | 25%  | 0%   | 0%   | 100% | 0%   | 100% | 0%   | 0%   | 0%   |
| 26   | 26   | Legal, social and cultural professionals                                          | 100% | 0%   | 0%   | 0%   | 0%   | 0%   | 0%   | 0%   | 0%   | 0%   | 0%   | 0%   | 0%   | 0%   | 100% | 0%   | 0%   | 0%   | 0%   | 0%   |
| 31   | 31   | Science and engineering associate professionals                                   | 100% | 10%  | 10%  | 10%  | 10%  | 10%  | 0%   | 0%   | 50%  | 0%   | 25%  | 25%  | 0%   | 0%   | 100% | 0%   | 100% | 0%   | 0%   | 0%   |
| 32   | 32   | Health associate professionals                                                    | 100% | 100% | 100% | 100% | 100% | 100% | 100% | 100% | 100% | 100% | 100% | 100% | 100% | 100% | 100% | 100% | 100% | 100% | 100% | 100% |
| 33   | 33   | Business and administration associate professionals                               | 100% | 10%  | 10%  | 10%  | 10%  | 10%  | 0%   | 0%   | 50%  | 0%   | 25%  | 25%  | 0%   | 0%   | 100% | 0%   | 100% | 0%   | 0%   | 0%   |
| 34   | 34   | Legal, social, cultural and related associate professionals                       | 100% | 0%   | 0%   | 0%   | 0%   | 0%   | 0%   | 0%   | 0%   | 0%   | 0%   | 0%   | 0%   | 0%   | 100% | 0%   | 100% | 0%   | 0%   | 0%   |
| 35   | 35   | Information and communications technicians                                        | 100% | 10%  | 10%  | 10%  | 10%  | 10%  | 0%   | 0%   | 50%  | 0%   | 25%  | 25%  | 0%   | 0%   | 100% | 0%   | 100% | 0%   | 0%   | 0%   |
| 41   | 41   | General and keyboard clerks                                                       | 100% | 10%  | 10%  | 10%  | 10%  | 10%  | 0%   | 0%   | 50%  | 0%   | 25%  | 25%  | 0%   | 0%   | 100% | 0%   | 100% | 0%   | 0%   | 0%   |
| 42   | 42   | Customer services clerks                                                          | 100% | 10%  | 10%  | 10%  | 10%  | 10%  | 0%   | 0%   | 0%   | 0%   | 25%  | 25%  | 0%   | 0%   | 100% | 0%   | 100% | 0%   | 0%   | 0%   |
| 43   | 43   | Numerical and material recording clerks                                           | 100% | 10%  | 10%  | 10%  | 10%  | 10%  | 0%   | 0%   | 50%  | 0%   | 25%  | 25%  | 0%   | 0%   | 100% | 0%   | 100% | 0%   | 0%   | 0%   |
| 44   | 44   | Other clerical support workers                                                    | 100% | 10%  | 10%  | 10%  | 10%  | 10%  | 0%   | 0%   | 0%   | 0%   | 25%  | 25%  | 0%   | 0%   | 100% | 0%   | 100% | 0%   | 0%   | 0%   |
| 51   | 51   | Personal service workers                                                          | 100% | 0%   | 0%   | 0%   | 0%   | 0%   | 0%   | 0%   | 0%   | 0%   | 0%   | 0%   | 0%   | 0%   | 100% | 0%   | 0%   | 0%   | 0%   | 0%   |
| 52   | 52   | Sales workers                                                                     | 100% | 0%   | 0%   | 0%   | 0%   | 0%   | 0%   | 0%   | 0%   | 0%   | 0%   | 0%   | 0%   | 0%   | 100% | 0%   | 0%   | 0%   | 0%   | 0%   |
| 53   | 53   | Personal care workers                                                             | 100% | 10%  | 10%  | 10%  | 10%  | 10%  | 0%   | 0%   | 100% | 0%   | 25%  | 25%  | 0%   | 0%   | 100% | 0%   | 100% | 0%   | 0%   | 0%   |
| 54   | 54   | Protective services workers                                                       | 100% | 10%  | 10%  | 10%  | 10%  | 10%  | 0%   | 0%   | 0%   | 0%   | 25%  | 25%  | 0%   | 0%   | 100% | 0%   | 100% | 0%   | 0%   | 0%   |
| 61   | 61   | Market-oriented skilled agricultural workers                                      | 100% | 10%  | 10%  | 10%  | 10%  | 10%  | 0%   | 0%   | 0%   | 0%   | 25%  | 25%  | 100% | 100% | 100% | 0%   | 0%   | 100% | 100% | 100% |
| 62   | 62   | Market-oriented skilled forestry, fishery and hunting workers                     | 100% | 10%  | 10%  | 10%  | 10%  | 10%  | 0%   | 0%   | 0%   | 0%   | 25%  | 25%  | 0%   | 0%   | 100% | 0%   | 0%   | 0%   | 0%   | 0%   |
| 63   | 63   | Subsistence farmers, fishers, hunters and gatherers                               | 100% | 100% | 100% | 100% | 100% | 100% | 100% | 100% | 100% | 100% | 100% | 100% | 100% | 100% | 100% | 100% | 100% | 100% | 100% | 100% |
| 71   | 71   | Building and related trades workers, excluding electricians                       | 100% | 10%  | 10%  | 10%  | 10%  | 10%  | 0%   | 0%   | 0%   | 0%   | 25%  | 25%  | 0%   | 0%   | 100% | 0%   | 0%   | 0%   | 0%   | 0%   |
| 72   | 72   | Metal, machinery and related trades workers                                       | 100% | 10%  | 10%  | 10%  | 10%  | 10%  | 0%   | 0%   | 0%   | 0%   | 25%  | 25%  | 0%   | 0%   | 100% | 0%   | 0%   | 0%   | 0%   | 0%   |
| 73   | 73   | Handicraft and printing workers                                                   | 100% | 10%  | 10%  | 10%  | 10%  | 10%  | 0%   | 0%   | 0%   | 0%   | 25%  | 25%  | 0%   | 0%   | 100% | 0%   | 0%   | 0%   | 0%   | 0%   |
| 74   | 74   | Electrical and electronic trades workers                                          | 100% | 10%  | 10%  | 10%  | 10%  | 10%  | 0%   | 0%   | 0%   | 0%   | 25%  | 25%  | 0%   | 0%   | 100% | 0%   | 100% | 0%   | 0%   | 0%   |
| 75   | 75   | Food processing, wood working, garment and other craft and related trades workers | 100% | 10%  | 10%  | 10%  | 10%  | 10%  | 0%   | 0%   | 0%   | 25%  | 25%  | 25%  | 0%   | 0%   | 100% | 0%   | 0%   | 0%   | 0%   | 0%   |
| 81   | 81   | Stationary plant and machine operators                                            | 100% | 10%  | 10%  | 10%  | 10%  | 10%  | 0%   | 0%   | 0%   | 0%   | 25%  | 25%  | 0%   | 0%   | 100% | 0%   | 0%   | 0%   | 0%   | 0%   |
| 82   | 82   | Assemblers                                                                        | 100% | 10%  | 10%  | 10%  | 10%  | 10%  | 0%   | 0%   | 0%   | 0%   | 25%  | 25%  | 0%   | 0%   | 100% | 0%   | 0%   | 0%   | 0%   | 0%   |
| 83   | 83   | Drivers and mobile plant operators                                                | 100% | 10%  | 10%  | 10%  | 10%  | 10%  | 0%   | 0%   | 50%  | 25%  | 25%  | 25%  | 0%   | 0%   | 100% | 0%   | 50%  | 0%   | 0%   | 0%   |
| 91   | 91   | Cleaners and helpers                                                              | 100% | 10%  | 10%  | 10%  | 10%  | 10%  | 0%   | 0%   | 0%   | 0%   | 25%  | 25%  | 0%   | 0%   | 100% | 0%   | 100% | 0%   | 0%   | 0%   |
| 92   | 92   | Agricultural, forestry and fishery labourers                                      | 100% | 10%  | 10%  | 10%  | 10%  | 10%  | 0%   | 0%   | 50%  | 0%   | 25%  | 25%  | 0%   | 0%   | 100% | 0%   | 0%   | 0%   | 0%   | 0%   |
| 93   | 93   | Labourers in mining, construction, manufacturing and transport                    | 100% | 10%  | 10%  | 10%  | 10%  | 10%  | 0%   | 0%   | 25%  | 0%   | 25%  | 25%  | 0%   | 0%   | 100% | 0%   | 0%   | 0%   | 0%   | 0%   |
| 94   | 94   | Food preparation assistants                                                       | 100% | 10%  | 10%  | 10%  | 10%  | 10%  | 0%   | 100% | 25%  | 25%  | 25%  | 25%  | 0%   | 0%   | 100% | 0%   | 100% | 0%   | 0%   | 0%   |
| 95   | 95   | Street and related sales and service workers                                      | 100% | 10%  | 10%  | 10%  | 10%  | 10%  | 0%   | 0%   | 0%   | 0%   | 25%  | 25%  | 0%   | 0%   | 100% | 0%   | 100% | 0%   | 0%   | 0%   |
| 96   | 96   | Refuse workers and other elementary workers                                       | 100% | 10%  | 10%  | 10%  | 10%  | 10%  | 0%   | 0%   | 0%   | 0%   | 25%  | 25%  | 0%   | 0%   | 100% | 0%   | 100% | 0%   | 0%   | 0%   |



## Pakistan

## Percent of jobs that were closed during lockdown

| Isc0 | Nace | Occupation description                                                            | A.                                                    | B. Mining                                | C.            | D.                                    | E. Water supply;                                 | F.           | G. Wholesale and                                 | H.                            | I.                                | J.                                             | K. Financial                                | L. Real                   | M.                                                            | N.                                          | O. Public                      | P. Education | Q. Human                                      | R. Arts,                        | S. Other                    | T. Activities of households                                                                               |
|------|------|-----------------------------------------------------------------------------------|-------------------------------------------------------|------------------------------------------|---------------|---------------------------------------|--------------------------------------------------|--------------|--------------------------------------------------|-------------------------------|-----------------------------------|------------------------------------------------|---------------------------------------------|---------------------------|---------------------------------------------------------------|---------------------------------------------|--------------------------------|--------------|-----------------------------------------------|---------------------------------|-----------------------------|-----------------------------------------------------------------------------------------------------------|
|      |      |                                                                                   | Agriculture; and<br>forestry and quarrying<br>fishing | and<br>forestry and quarrying<br>fishing | Manufacturing | Electricity;<br>gas, steam<br>and air | sewerage, waste<br>management and<br>remediation | Construction | retail trade;<br>repair of motor<br>vehicles and | Transportation and<br>storage | Accommodation and<br>food service | Information and<br>communication<br>activities | Insurance<br>and<br>financial<br>activities | Real estate<br>activities | Professional,<br>scientific<br>and<br>technical<br>activities | Administrative and<br>support<br>activities | Administration and<br>defence; |              | Human health and<br>social work<br>activities | Arts, culture and<br>recreation | Other service<br>activities | Activities of households<br>as employers;<br>undifferentiated goods-<br>and services-producing activities |
|      |      |                                                                                   | A                                                     | B                                        | C             | D                                     | E                                                | F            | G                                                | H                             | I                                 | J                                              | K                                           | L                         | M                                                             | N                                           | O                              | P            | Q                                             | R                               | S                           | T                                                                                                         |
| 11   | 11   | Chief executives, senior officials and legislators                                | 0%                                                    | 0%                                       | 0%            | 0%                                    | 0%                                               | 0%           | 0%                                               | 100%                          | 0%                                | 100%                                           | 0%                                          | 0%                        | 0%                                                            | 0%                                          | 0%                             | 0%           | 0%                                            | 0%                              | 100%                        | 100%                                                                                                      |
| 12   | 12   | Administrative and commercial managers                                            | 0%                                                    | 0%                                       | 0%            | 0%                                    | 0%                                               | 0%           | 0%                                               | 100%                          | 0%                                | 100%                                           | 0%                                          | 0%                        | 0%                                                            | 0%                                          | 0%                             | 0%           | 0%                                            | 0%                              | 0%                          | 100%                                                                                                      |
| 13   | 13   | Production and specialised services managers                                      | 0%                                                    | 0%                                       | 0%            | 0%                                    | 0%                                               | 0%           | 0%                                               | 100%                          | 0%                                | 100%                                           | 0%                                          | 0%                        | 0%                                                            | 0%                                          | 0%                             | 0%           | 0%                                            | 0%                              | 100%                        | 100%                                                                                                      |
| 14   | 14   | Hospitality, retail and other services managers                                   | 0%                                                    | 0%                                       | 0%            | 0%                                    | 0%                                               | 0%           | 0%                                               | 100%                          | 0%                                | 100%                                           | 0%                                          | 0%                        | 0%                                                            | 0%                                          | 0%                             | 0%           | 0%                                            | 0%                              | 100%                        | 100%                                                                                                      |
| 21   | 21   | Science and engineering professionals                                             | 0%                                                    | 0%                                       | 0%            | 0%                                    | 0%                                               | 0%           | 0%                                               | 100%                          | 0%                                | 100%                                           | 0%                                          | 0%                        | 0%                                                            | 0%                                          | 0%                             | 0%           | 0%                                            | 0%                              | 100%                        | 100%                                                                                                      |
| 22   | 22   | Health professionals                                                              | 0%                                                    | 0%                                       | 0%            | 0%                                    | 0%                                               | 0%           | 0%                                               | 0%                            | 0%                                | 0%                                             | 0%                                          | 0%                        | 0%                                                            | 0%                                          | 0%                             | 0%           | 0%                                            | 0%                              | 0%                          | 0%                                                                                                        |
| 23   | 23   | Teaching professionals                                                            | 0%                                                    | 0%                                       | 0%            | 0%                                    | 0%                                               | 0%           | 0%                                               | 100%                          | 0%                                | 100%                                           | 0%                                          | 0%                        | 0%                                                            | 0%                                          | 0%                             | 0%           | 0%                                            | 0%                              | 100%                        | 100%                                                                                                      |
| 24   | 24   | Business and administration professionals                                         | 0%                                                    | 0%                                       | 0%            | 0%                                    | 0%                                               | 0%           | 0%                                               | 100%                          | 0%                                | 100%                                           | 0%                                          | 0%                        | 0%                                                            | 0%                                          | 0%                             | 0%           | 0%                                            | 0%                              | 100%                        | 100%                                                                                                      |
| 25   | 25   | Information and communications technology professionals                           | 0%                                                    | 0%                                       | 0%            | 0%                                    | 0%                                               | 0%           | 0%                                               | 100%                          | 0%                                | 100%                                           | 0%                                          | 0%                        | 0%                                                            | 0%                                          | 0%                             | 0%           | 0%                                            | 0%                              | 100%                        | 100%                                                                                                      |
| 26   | 26   | Legal, social and cultural professionals                                          | 0%                                                    | 75%                                      | 75%           | 75%                                   | 75%                                              | 75%          | 75%                                              | 75%                           | 75%                               | 100%                                           | 75%                                         | 75%                       | 75%                                                           | 75%                                         | 75%                            | 0%           | 75%                                           | 0%                              | 100%                        | 100%                                                                                                      |
| 31   | 31   | Science and engineering associate professionals                                   | 0%                                                    | 0%                                       | 0%            | 0%                                    | 0%                                               | 0%           | 0%                                               | 100%                          | 0%                                | 100%                                           | 0%                                          | 0%                        | 0%                                                            | 0%                                          | 0%                             | 0%           | 0%                                            | 0%                              | 100%                        | 100%                                                                                                      |
| 32   | 32   | Health associate professionals                                                    | 0%                                                    | 0%                                       | 0%            | 0%                                    | 0%                                               | 0%           | 0%                                               | 0%                            | 0%                                | 0%                                             | 0%                                          | 0%                        | 0%                                                            | 0%                                          | 0%                             | 0%           | 0%                                            | 0%                              | 0%                          | 0%                                                                                                        |
| 33   | 33   | Business and administration associate professionals                               | 0%                                                    | 0%                                       | 0%            | 0%                                    | 0%                                               | 0%           | 0%                                               | 100%                          | 0%                                | 100%                                           | 0%                                          | 0%                        | 0%                                                            | 0%                                          | 0%                             | 0%           | 0%                                            | 0%                              | 100%                        | 100%                                                                                                      |
| 34   | 34   | Legal, social, cultural and related associate professionals                       | 0%                                                    | 75%                                      | 75%           | 75%                                   | 75%                                              | 75%          | 75%                                              | 75%                           | 75%                               | 100%                                           | 75%                                         | 75%                       | 75%                                                           | 75%                                         | 75%                            | 0%           | 75%                                           | 0%                              | 100%                        | 100%                                                                                                      |
| 35   | 35   | Information and communications technicians                                        | 0%                                                    | 0%                                       | 0%            | 0%                                    | 0%                                               | 0%           | 0%                                               | 100%                          | 0%                                | 100%                                           | 0%                                          | 0%                        | 0%                                                            | 0%                                          | 0%                             | 0%           | 0%                                            | 0%                              | 100%                        | 100%                                                                                                      |
| 41   | 41   | General and keyboard clerks                                                       | 0%                                                    | 0%                                       | 0%            | 0%                                    | 0%                                               | 0%           | 0%                                               | 100%                          | 0%                                | 100%                                           | 0%                                          | 0%                        | 0%                                                            | 0%                                          | 0%                             | 0%           | 0%                                            | 0%                              | 100%                        | 100%                                                                                                      |
| 42   | 42   | Customer services clerks                                                          | 0%                                                    | 0%                                       | 0%            | 0%                                    | 0%                                               | 0%           | 0%                                               | 100%                          | 0%                                | 100%                                           | 0%                                          | 0%                        | 0%                                                            | 0%                                          | 0%                             | 0%           | 0%                                            | 0%                              | 100%                        | 100%                                                                                                      |
| 43   | 43   | Numerical and material recording clerks                                           | 0%                                                    | 0%                                       | 0%            | 0%                                    | 0%                                               | 0%           | 0%                                               | 100%                          | 0%                                | 100%                                           | 0%                                          | 0%                        | 0%                                                            | 0%                                          | 0%                             | 0%           | 0%                                            | 0%                              | 100%                        | 100%                                                                                                      |
| 44   | 44   | Other clerical support workers                                                    | 0%                                                    | 0%                                       | 0%            | 0%                                    | 0%                                               | 0%           | 0%                                               | 100%                          | 0%                                | 100%                                           | 0%                                          | 0%                        | 0%                                                            | 0%                                          | 0%                             | 0%           | 0%                                            | 0%                              | 100%                        | 100%                                                                                                      |
| 51   | 51   | Personal service workers                                                          | 0%                                                    | 100%                                     | 100%          | 100%                                  | 100%                                             | 100%         | 100%                                             | 100%                          | 100%                              | 100%                                           | 100%                                        | 100%                      | 100%                                                          | 100%                                        | 100%                           | 0%           | 100%                                          | 0%                              | 100%                        | 100%                                                                                                      |
| 52   | 52   | Sales workers                                                                     | 0%                                                    | 75%                                      | 75%           | 75%                                   | 75%                                              | 75%          | 75%                                              | 75%                           | 75%                               | 0%                                             | 0%                                          | 0%                        | 100%                                                          | 100%                                        | 100%                           | 0%           | 75%                                           | 0%                              | 100%                        | 100%                                                                                                      |
| 53   | 53   | Personal care workers                                                             | 0%                                                    | 0%                                       | 0%            | 0%                                    | 0%                                               | 0%           | 0%                                               | 0%                            | 0%                                | 100%                                           | 0%                                          | 0%                        | 0%                                                            | 0%                                          | 0%                             | 0%           | 0%                                            | 0%                              | 100%                        | 100%                                                                                                      |
| 54   | 54   | Protective services workers                                                       | 0%                                                    | 0%                                       | 0%            | 0%                                    | 0%                                               | 0%           | 0%                                               | 100%                          | 0%                                | 100%                                           | 0%                                          | 0%                        | 0%                                                            | 0%                                          | 0%                             | 0%           | 0%                                            | 0%                              | 100%                        | 100%                                                                                                      |
| 61   | 61   | Market-oriented skilled agricultural workers                                      | 0%                                                    | 0%                                       | 0%            | 0%                                    | 0%                                               | 0%           | 0%                                               | 100%                          | 0%                                | 100%                                           | 0%                                          | 0%                        | 0%                                                            | 0%                                          | 0%                             | 0%           | 0%                                            | 0%                              | 0%                          | 0%                                                                                                        |
| 62   | 62   | Market-oriented skilled forestry, fishery and hunting workers                     | 0%                                                    | 0%                                       | 0%            | 0%                                    | 0%                                               | 0%           | 0%                                               | 100%                          | 0%                                | 100%                                           | 0%                                          | 0%                        | 0%                                                            | 0%                                          | 0%                             | 0%           | 0%                                            | 0%                              | 100%                        | 100%                                                                                                      |
| 63   | 63   | Subsistence farmers, fishers, hunters and gatherers                               | 0%                                                    | 0%                                       | 0%            | 0%                                    | 0%                                               | 0%           | 0%                                               | 0%                            | 0%                                | 0%                                             | 0%                                          | 0%                        | 0%                                                            | 0%                                          | 0%                             | 0%           | 0%                                            | 0%                              | 0%                          | 0%                                                                                                        |
| 71   | 71   | Building and related trades workers, excluding electricians                       | 0%                                                    | 0%                                       | 0%            | 0%                                    | 0%                                               | 0%           | 0%                                               | 100%                          | 0%                                | 100%                                           | 0%                                          | 0%                        | 0%                                                            | 0%                                          | 0%                             | 0%           | 0%                                            | 0%                              | 100%                        | 100%                                                                                                      |
| 72   | 72   | Metal, machinery and related trades workers                                       | 0%                                                    | 0%                                       | 0%            | 0%                                    | 0%                                               | 0%           | 0%                                               | 100%                          | 0%                                | 100%                                           | 0%                                          | 0%                        | 0%                                                            | 0%                                          | 0%                             | 0%           | 0%                                            | 0%                              | 100%                        | 100%                                                                                                      |
| 73   | 73   | Handicraft and printing workers                                                   | 0%                                                    | 0%                                       | 0%            | 0%                                    | 0%                                               | 0%           | 0%                                               | 100%                          | 0%                                | 100%                                           | 0%                                          | 0%                        | 0%                                                            | 0%                                          | 0%                             | 0%           | 0%                                            | 0%                              | 100%                        | 100%                                                                                                      |
| 74   | 74   | Electrical and electronic trades workers                                          | 0%                                                    | 0%                                       | 0%            | 0%                                    | 0%                                               | 0%           | 0%                                               | 100%                          | 0%                                | 100%                                           | 0%                                          | 0%                        | 0%                                                            | 0%                                          | 0%                             | 0%           | 0%                                            | 0%                              | 100%                        | 100%                                                                                                      |
| 75   | 75   | Food processing, wood working, garment and other craft and related trades workers | 0%                                                    | 0%                                       | 0%            | 0%                                    | 0%                                               | 0%           | 0%                                               | 100%                          | 0%                                | 0%                                             | 0%                                          | 0%                        | 0%                                                            | 0%                                          | 0%                             | 100%         | 0%                                            | 100%                            | 100%                        | 100%                                                                                                      |
| 81   | 81   | Stationary plant and machine operators                                            | 0%                                                    | 0%                                       | 0%            | 0%                                    | 0%                                               | 0%           | 0%                                               | 100%                          | 0%                                | 100%                                           | 0%                                          | 0%                        | 0%                                                            | 0%                                          | 0%                             | 0%           | 0%                                            | 0%                              | 100%                        | 100%                                                                                                      |
| 82   | 82   | Assemblers                                                                        | 0%                                                    | 0%                                       | 0%            | 0%                                    | 0%                                               | 0%           | 0%                                               | 100%                          | 0%                                | 100%                                           | 0%                                          | 0%                        | 0%                                                            | 0%                                          | 0%                             | 0%           | 0%                                            | 0%                              | 100%                        | 100%                                                                                                      |
| 83   | 83   | Drivers and mobile plant operators                                                | 0%                                                    | 0%                                       | 0%            | 0%                                    | 0%                                               | 0%           | 0%                                               | 100%                          | 0%                                | 0%                                             | 0%                                          | 0%                        | 0%                                                            | 0%                                          | 0%                             | 0%           | 0%                                            | 0%                              | 100%                        | 100%                                                                                                      |
| 91   | 91   | Cleaners and helpers                                                              | 0%                                                    | 0%                                       | 0%            | 0%                                    | 0%                                               | 0%           | 0%                                               | 100%                          | 0%                                | 100%                                           | 0%                                          | 0%                        | 0%                                                            | 0%                                          | 0%                             | 100%         | 0%                                            | 100%                            | 100%                        | 100%                                                                                                      |
| 92   | 92   | Agricultural, forestry and fishery labourers                                      | 0%                                                    | 0%                                       | 0%            | 0%                                    | 0%                                               | 0%           | 0%                                               | 100%                          | 0%                                | 100%                                           | 0%                                          | 0%                        | 0%                                                            | 0%                                          | 0%                             | 0%           | 0%                                            | 0%                              | 100%                        | 100%                                                                                                      |
| 93   | 93   | Labourers in mining, construction, manufacturing and transport                    | 0%                                                    | 0%                                       | 0%            | 0%                                    | 0%                                               | 0%           | 0%                                               | 100%                          | 0%                                | 100%                                           | 0%                                          | 0%                        | 0%                                                            | 0%                                          | 0%                             | 0%           | 0%                                            | 0%                              | 100%                        | 100%                                                                                                      |
| 94   | 94   | Food preparation assistants                                                       | 0%                                                    | 0%                                       | 0%            | 0%                                    | 0%                                               | 0%           | 0%                                               | 0%                            | 0%                                | 0%                                             | 0%                                          | 0%                        | 0%                                                            | 0%                                          | 0%                             | 0%           | 0%                                            | 0%                              | 100%                        | 100%                                                                                                      |
| 95   | 95   | Street and related sales and service workers                                      | 0%                                                    | 0%                                       | 0%            | 0%                                    | 0%                                               | 0%           | 0%                                               | 100%                          | 0%                                | 100%                                           | 0%                                          | 0%                        | 0%                                                            | 0%                                          | 0%                             | 0%           | 0%                                            | 0%                              | 100%                        | 100%                                                                                                      |
| 96   | 96   | Refuse workers and other elementary workers                                       | 0%                                                    | 0%                                       | 0%            | 0%                                    | 0%                                               | 0%           | 0%                                               | 100%                          | 0%                                | 100%                                           | 0%                                          | 0%                        | 0%                                                            | 0%                                          | 0%                             | 0%           | 0%                                            | 0%                              | 100%                        | 100%                                                                                                      |

## Pakistan

## Percent of jobs subject to teleworking during lockdown

| Isc0 | Nace | Occupation description                                                            | A.                                    | B. Mining     | C.            | D.                              | E. Water supply;                           | F.           | G. Wholesale and                           | H.                         | I.                             | J.                            | K. Financial                       | L. Real                | M.                                     | N.                         | O. Public                   | P. Education | Q. Human                                | R. Arts,                     | S. Other           | T. Activities of households                                             |    |
|------|------|-----------------------------------------------------------------------------------|---------------------------------------|---------------|---------------|---------------------------------|--------------------------------------------|--------------|--------------------------------------------|----------------------------|--------------------------------|-------------------------------|------------------------------------|------------------------|----------------------------------------|----------------------------|-----------------------------|--------------|-----------------------------------------|------------------------------|--------------------|-------------------------------------------------------------------------|----|
|      |      |                                                                                   | Agriculture; and forestry and fishing | and quarrying | Manufacturing | Electricity; gas, steam and air | sewerage, waste management and remediation | Construction | retail trade; repair of motor vehicles and | Transportation and storage | Accommodation and food service | Information and communication | Insurance and financial activities | Real estate activities | Professional, scientific and technical | Administrative and support | administration and defence; |              | Human health and social work activities | entertainment and recreation | service activities | as employers; undifferentiated goods- and services-producing activities |    |
|      |      |                                                                                   | A                                     | B             | C             | D                               | E                                          | F            | G                                          | H                          | I                              | J                             | K                                  | L                      | M                                      | N                          | O                           | P            | Q                                       | R                            | S                  | T                                                                       |    |
| 11   | 11   | Chief executives, senior officials and legislators                                | 0%                                    | 90%           | 90%           | 90%                             | 90%                                        | 90%          | 100%                                       | 0%                         | 50%                            | 0%                            | 75%                                | 75%                    | 100%                                   | 100%                       | 100%                        | 0%           | 100%                                    | 0%                           | 0%                 | 0%                                                                      | 0% |
| 12   | 12   | Administrative and commercial managers                                            | 0%                                    | 90%           | 90%           | 90%                             | 90%                                        | 90%          | 100%                                       | 0%                         | 50%                            | 0%                            | 75%                                | 75%                    | 100%                                   | 100%                       | 100%                        | 0%           | 100%                                    | 0%                           | 0%                 | 0%                                                                      | 0% |
| 13   | 13   | Production and specialised services managers                                      | 0%                                    | 90%           | 90%           | 90%                             | 90%                                        | 90%          | 100%                                       | 0%                         | 50%                            | 0%                            | 75%                                | 75%                    | 100%                                   | 100%                       | 100%                        | 0%           | 100%                                    | 0%                           | 0%                 | 0%                                                                      | 0% |
| 14   | 14   | Hospitality, retail and other services managers                                   | 0%                                    | 90%           | 90%           | 90%                             | 90%                                        | 90%          | 100%                                       | 0%                         | 50%                            | 0%                            | 75%                                | 75%                    | 100%                                   | 100%                       | 100%                        | 0%           | 100%                                    | 0%                           | 0%                 | 0%                                                                      | 0% |
| 21   | 21   | Science and engineering professionals                                             | 0%                                    | 90%           | 90%           | 90%                             | 90%                                        | 90%          | 100%                                       | 0%                         | 50%                            | 0%                            | 75%                                | 75%                    | 100%                                   | 100%                       | 100%                        | 0%           | 100%                                    | 0%                           | 0%                 | 0%                                                                      | 0% |
| 22   | 22   | Health professionals                                                              | 0%                                    | 0%            | 0%            | 0%                              | 0%                                         | 0%           | 0%                                         | 0%                         | 0%                             | 0%                            | 0%                                 | 0%                     | 0%                                     | 0%                         | 0%                          | 0%           | 0%                                      | 0%                           | 0%                 | 0%                                                                      | 0% |
| 23   | 23   | Teaching professionals                                                            | 0%                                    | 90%           | 90%           | 90%                             | 90%                                        | 90%          | 100%                                       | 0%                         | 100%                           | 0%                            | 75%                                | 75%                    | 100%                                   | 100%                       | 100%                        | 0%           | 100%                                    | 100%                         | 0%                 | 0%                                                                      | 0% |
| 24   | 24   | Business and administration professionals                                         | 0%                                    | 90%           | 90%           | 90%                             | 90%                                        | 90%          | 100%                                       | 0%                         | 50%                            | 0%                            | 75%                                | 75%                    | 100%                                   | 100%                       | 100%                        | 0%           | 100%                                    | 0%                           | 0%                 | 0%                                                                      | 0% |
| 25   | 25   | Information and communications technology professionals                           | 0%                                    | 90%           | 90%           | 90%                             | 90%                                        | 90%          | 100%                                       | 0%                         | 100%                           | 0%                            | 75%                                | 75%                    | 100%                                   | 100%                       | 100%                        | 0%           | 100%                                    | 0%                           | 0%                 | 0%                                                                      | 0% |
| 26   | 26   | Legal, social and cultural professionals                                          | 0%                                    | 25%           | 25%           | 25%                             | 25%                                        | 25%          | 25%                                        | 25%                        | 25%                            | 0%                            | 25%                                | 25%                    | 25%                                    | 25%                        | 25%                         | 0%           | 25%                                     | 100%                         | 0%                 | 0%                                                                      | 0% |
| 31   | 31   | Science and engineering associate professionals                                   | 0%                                    | 90%           | 90%           | 90%                             | 90%                                        | 90%          | 100%                                       | 0%                         | 50%                            | 0%                            | 75%                                | 75%                    | 100%                                   | 100%                       | 100%                        | 0%           | 100%                                    | 0%                           | 0%                 | 0%                                                                      | 0% |
| 32   | 32   | Health associate professionals                                                    | 0%                                    | 0%            | 0%            | 0%                              | 0%                                         | 0%           | 0%                                         | 0%                         | 0%                             | 0%                            | 0%                                 | 0%                     | 0%                                     | 0%                         | 0%                          | 0%           | 0%                                      | 0%                           | 0%                 | 0%                                                                      | 0% |
| 33   | 33   | Business and administration associate professionals                               | 0%                                    | 90%           | 90%           | 90%                             | 90%                                        | 90%          | 100%                                       | 0%                         | 50%                            | 0%                            | 75%                                | 75%                    | 100%                                   | 100%                       | 100%                        | 0%           | 100%                                    | 0%                           | 0%                 | 0%                                                                      | 0% |
| 34   | 34   | Legal, social, cultural and related associate professionals                       | 0%                                    | 25%           | 25%           | 25%                             | 25%                                        | 25%          | 25%                                        | 25%                        | 25%                            | 0%                            | 25%                                | 25%                    | 25%                                    | 25%                        | 25%                         | 0%           | 25%                                     | 0%                           | 0%                 | 0%                                                                      | 0% |
| 35   | 35   | Information and communications technicians                                        | 0%                                    | 90%           | 90%           | 90%                             | 90%                                        | 90%          | 100%                                       | 0%                         | 50%                            | 0%                            | 75%                                | 75%                    | 100%                                   | 100%                       | 100%                        | 0%           | 100%                                    | 0%                           | 0%                 | 0%                                                                      | 0% |
| 41   | 41   | General and keyboard clerks                                                       | 0%                                    | 90%           | 90%           | 90%                             | 90%                                        | 90%          | 100%                                       | 0%                         | 50%                            | 0%                            | 75%                                | 75%                    | 100%                                   | 100%                       | 100%                        | 0%           | 100%                                    | 0%                           | 0%                 | 0%                                                                      | 0% |
| 42   | 42   | Customer services clerks                                                          | 0%                                    | 90%           | 90%           | 90%                             | 90%                                        | 90%          | 100%                                       | 0%                         | 100%                           | 0%                            | 75%                                | 75%                    | 100%                                   | 100%                       | 100%                        | 0%           | 100%                                    | 0%                           | 0%                 | 0%                                                                      | 0% |
| 43   | 43   | Numerical and material recording clerks                                           | 0%                                    | 90%           | 90%           | 90%                             | 90%                                        | 90%          | 100%                                       | 0%                         | 50%                            | 0%                            | 75%                                | 75%                    | 100%                                   | 100%                       | 100%                        | 0%           | 100%                                    | 0%                           | 0%                 | 0%                                                                      | 0% |
| 44   | 44   | Other clerical support workers                                                    | 0%                                    | 90%           | 90%           | 90%                             | 90%                                        | 90%          | 100%                                       | 0%                         | 100%                           | 0%                            | 75%                                | 75%                    | 100%                                   | 100%                       | 100%                        | 0%           | 100%                                    | 0%                           | 0%                 | 0%                                                                      | 0% |
| 51   | 51   | Personal service workers                                                          | 0%                                    | 0%            | 0%            | 0%                              | 0%                                         | 0%           | 0%                                         | 0%                         | 0%                             | 0%                            | 0%                                 | 0%                     | 0%                                     | 0%                         | 0%                          | 0%           | 0%                                      | 100%                         | 0%                 | 0%                                                                      | 0% |
| 52   | 52   | Sales workers                                                                     | 0%                                    | 25%           | 25%           | 25%                             | 25%                                        | 25%          | 25%                                        | 25%                        | 25%                            | 100%                          | 100%                               | 100%                   | 0%                                     | 0%                         | 0%                          | 0%           | 25%                                     | 100%                         | 0%                 | 0%                                                                      | 0% |
| 53   | 53   | Personal care workers                                                             | 0%                                    | 90%           | 90%           | 90%                             | 90%                                        | 90%          | 100%                                       | 0%                         | 100%                           | 0%                            | 75%                                | 75%                    | 100%                                   | 100%                       | 100%                        | 0%           | 100%                                    | 0%                           | 0%                 | 0%                                                                      | 0% |
| 54   | 54   | Protective services workers                                                       | 0%                                    | 90%           | 90%           | 90%                             | 90%                                        | 90%          | 100%                                       | 0%                         | 100%                           | 0%                            | 75%                                | 75%                    | 100%                                   | 100%                       | 100%                        | 0%           | 100%                                    | 0%                           | 0%                 | 0%                                                                      | 0% |
| 61   | 61   | Market-oriented skilled agricultural workers                                      | 0%                                    | 90%           | 90%           | 90%                             | 90%                                        | 90%          | 100%                                       | 0%                         | 100%                           | 0%                            | 75%                                | 75%                    | 0%                                     | 0%                         | 0%                          | 0%           | 100%                                    | 100%                         | 0%                 | 0%                                                                      | 0% |
| 62   | 62   | Market-oriented skilled forestry, fishery and hunting workers                     | 0%                                    | 90%           | 90%           | 90%                             | 90%                                        | 90%          | 100%                                       | 0%                         | 100%                           | 0%                            | 75%                                | 75%                    | 100%                                   | 100%                       | 100%                        | 0%           | 100%                                    | 100%                         | 0%                 | 0%                                                                      | 0% |
| 63   | 63   | Subsistence farmers, fishers, hunters and gatherers                               | 0%                                    | 0%            | 0%            | 0%                              | 0%                                         | 0%           | 0%                                         | 0%                         | 0%                             | 0%                            | 0%                                 | 0%                     | 0%                                     | 0%                         | 0%                          | 0%           | 0%                                      | 0%                           | 0%                 | 0%                                                                      | 0% |
| 71   | 71   | Building and related trades workers, excluding electricians                       | 0%                                    | 90%           | 90%           | 90%                             | 90%                                        | 90%          | 100%                                       | 0%                         | 100%                           | 0%                            | 75%                                | 75%                    | 100%                                   | 100%                       | 100%                        | 0%           | 100%                                    | 100%                         | 0%                 | 0%                                                                      | 0% |
| 72   | 72   | Metal, machinery and related trades workers                                       | 0%                                    | 90%           | 90%           | 90%                             | 90%                                        | 90%          | 100%                                       | 0%                         | 100%                           | 0%                            | 75%                                | 75%                    | 100%                                   | 100%                       | 100%                        | 0%           | 100%                                    | 100%                         | 0%                 | 0%                                                                      | 0% |
| 73   | 73   | Handicraft and printing workers                                                   | 0%                                    | 90%           | 90%           | 90%                             | 90%                                        | 90%          | 100%                                       | 0%                         | 100%                           | 0%                            | 75%                                | 75%                    | 100%                                   | 100%                       | 100%                        | 0%           | 100%                                    | 100%                         | 0%                 | 0%                                                                      | 0% |
| 74   | 74   | Electrical and electronic trades workers                                          | 0%                                    | 90%           | 90%           | 90%                             | 90%                                        | 90%          | 100%                                       | 0%                         | 100%                           | 0%                            | 75%                                | 75%                    | 100%                                   | 100%                       | 100%                        | 0%           | 100%                                    | 0%                           | 0%                 | 0%                                                                      | 0% |
| 75   | 75   | Food processing, wood working, garment and other craft and related trades workers | 0%                                    | 90%           | 90%           | 90%                             | 90%                                        | 90%          | 100%                                       | 0%                         | 100%                           | 75%                           | 75%                                | 75%                    | 100%                                   | 100%                       | 100%                        | 0%           | 0%                                      | 100%                         | 0%                 | 0%                                                                      | 0% |
| 81   | 81   | Stationary plant and machine operators                                            | 0%                                    | 90%           | 90%           | 90%                             | 90%                                        | 90%          | 100%                                       | 0%                         | 100%                           | 0%                            | 75%                                | 75%                    | 100%                                   | 100%                       | 100%                        | 0%           | 100%                                    | 100%                         | 0%                 | 0%                                                                      | 0% |
| 82   | 82   | Assemblers                                                                        | 0%                                    | 90%           | 90%           | 90%                             | 90%                                        | 90%          | 100%                                       | 0%                         | 100%                           | 0%                            | 75%                                | 75%                    | 100%                                   | 100%                       | 100%                        | 0%           | 100%                                    | 100%                         | 0%                 | 0%                                                                      | 0% |
| 83   | 83   | Drivers and mobile plant operators                                                | 0%                                    | 90%           | 90%           | 90%                             | 90%                                        | 90%          | 100%                                       | 0%                         | 50%                            | 75%                           | 75%                                | 75%                    | 100%                                   | 100%                       | 100%                        | 0%           | 100%                                    | 50%                          | 0%                 | 0%                                                                      | 0% |
| 91   | 91   | Cleaners and helpers                                                              | 0%                                    | 90%           | 90%           | 90%                             | 90%                                        | 90%          | 100%                                       | 0%                         | 100%                           | 0%                            | 75%                                | 75%                    | 100%                                   | 100%                       | 100%                        | 0%           | 0%                                      | 0%                           | 0%                 | 0%                                                                      | 0% |
| 92   | 92   | Agricultural, forestry and fishery labourers                                      | 0%                                    | 90%           | 90%           | 90%                             | 90%                                        | 90%          | 100%                                       | 0%                         | 50%                            | 0%                            | 75%                                | 75%                    | 100%                                   | 100%                       | 100%                        | 0%           | 100%                                    | 100%                         | 0%                 | 0%                                                                      | 0% |
| 93   | 93   | Labourers in mining, construction, manufacturing and transport                    | 0%                                    | 90%           | 90%           | 90%                             | 90%                                        | 90%          | 100%                                       | 0%                         | 75%                            | 0%                            | 75%                                | 75%                    | 100%                                   | 100%                       | 100%                        | 0%           | 100%                                    | 100%                         | 0%                 | 0%                                                                      | 0% |
| 94   | 94   | Food preparation assistants                                                       | 0%                                    | 90%           | 90%           | 90%                             | 90%                                        | 90%          | 100%                                       | 0%                         | 75%                            | 75%                           | 75%                                | 75%                    | 100%                                   | 100%                       | 100%                        | 0%           | 100%                                    | 0%                           | 0%                 | 0%                                                                      | 0% |
| 95   | 95   | Street and related sales and service workers                                      | 0%                                    | 90%           | 90%           | 90%                             | 90%                                        | 90%          | 100%                                       | 0%                         | 100%                           | 0%                            | 75%                                | 75%                    | 100%                                   | 100%                       | 100%                        | 0%           | 100%                                    | 0%                           | 0%                 | 0%                                                                      | 0% |
| 96   | 96   | Refuse workers and other elementary workers                                       | 0%                                    | 90%           | 90%           | 90%                             | 90%                                        | 90%          | 100%                                       | 0%                         | 100%                           | 0%                            | 75%                                | 75%                    | 100%                                   | 100%                       | 100%                        | 0%           | 100%                                    | 0%                           | 0%                 | 0%                                                                      | 0% |
